# Supplementary material for: Precisely timed dopamine signals establish distinct kinematic representations of skilled movements
Source: eLife. 2020 Nov 27;9:e61591. doi: 10.7554/eLife.61591 (PMC7861618; doi:10.7554/eLife.61591)
Supplement: Figure 1—figure supplement 2—source data 1. — Virus 1 = ‘ChR2 During’; Virus 2 = ‘ChR2 Between’; Virus 3 = ‘Arch During’; Virus 4 = ‘Arch Between’; Virus 5 = ‘EYFP’. [file elife-61591-fig1-figsupp2-data1.xlsx]

## Sheet: histo_coords
Rat	Virus	ML	DV	AP
160	3	2.2	7.5	-5.6
169	5	-2.1	7.7	-5.3
170	3	-1.8	8	-5.2
183	3	-2.4	7.2	-5.2
184	3	1.9	8.2	-5.3
186	1	-2.5	7.5	-5.2
187	1	2	8	-5.4
189	1	-1.9	7.9	-5.7
190	3	1.8	8	-5.2
191	1	1.9	7.7	-5.2
192	3	2.5	7.8	-5
193	1	-2.3	7.8	-5.2
195	1	-2.4	8	-5.2
196	5	1.9	7.7	-5.1
197	2	2.1	7.6	-5.9
198	5	-2.4	7.9	-4.6
216	2	-2.4	7.6	-4.8
218	2	1.9	8.2	-5
219	5	1.9	8.3	-5.1
220	5	-2.1	7.9	-5.7
221	2	2.2	7.5	-5.4
225	2	1.4	7.9	-5.6
227	5	1.4	8.3	-6
229	2	1.9	8.1	-5.4
230	2	1.9	7.7	-6.1
235	2	2.4	7.5	-5.4
309	4	1.9	7.8	-4.8
310	4	1.9	7.9	-5.3
311	4	2.4	7.3	-5.4
312	4	2.1	7.5	-6
