# Supplementary material for: Precisely timed dopamine signals establish distinct kinematic representations of skilled movements
Source: eLife. 2020 Nov 27;9:e61591. doi: 10.7554/eLife.61591 (PMC7861618; doi:10.7554/eLife.61591)
Supplement: Figure 2—figure supplement 2—source data 3. — A .xlsx file containing the statistical output of linear mixed-effects models run for each outcome type (Figure 2—figure supplement 2E). Statistics are reported for effects of laser and interactions between laser and session number. [file elife-61591-fig2-figsupp2-data3.xlsx]

## Sheet: Sheet1
Group	Outcome	Effect	df	t	p
ChR2 During	no pellet	laser	607	0.581	0.562
ChR2 During	no pellet	interaction: laser and session	612	-0.736	0.462
ChR2 During	first success	laser	106	-3.947	0.000143
ChR2 During	first success	interaction: laser and session	587	-1.752	0.08
ChR2 During	multi try success	laser	627	1.601	0.114
ChR2 During	multi try success	interaction: laser and session	587	0.41	0.682
ChR2 During	drop in box	laser	365	0.518	0.605
ChR2 During	drop in box	interaction: laser and session	612	-0.671	0.503
ChR2 During	pellet knocked off	laser	64	1.559	0.124
ChR2 During	pellet knocked off	interaction: laser and session	587	0.67	0.503
ChR2 During	used tongue	laser	NA	NA	NA
ChR2 During	used tongue	interaction: laser and session	NA	NA	NA
ChR2 During	trigger error	laser	600	-0.287	0.774
ChR2 During	trigger error	interaction: laser and session	612	0.509	0.611
ChR2 During	pellet remained	laser	46	1.757	0.086
ChR2 During	pellet remained	interaction: laser and session	612	2.094	0.037
ChR2 During	ipsilateral paw	laser	58	-1.766	0.083
ChR2 During	ipsilateral paw	interaction: laser and session	612	5.904	5.87e-09
ChR2 During	laser error	laser	389	0	1
ChR2 During	laser error	interaction: laser and session	612	0	1
ChR2 During	tongue and paw	laser	NA	NA	NA
ChR2 During	tongue and paw	interaction: laser and session	NA	NA	NA
ChR2 During	paw through slot	laser	273	0.64	0.523
ChR2 During	paw through slot	interaction: laser and session	587	2.069	0.039
EYFP	no pellet	laser	607	-1.965	0.169
EYFP	no pellet	interaction: laser and session	612	1.698	0.09
EYFP	first success	laser	106	0.754	0.09
EYFP	first success	interaction: laser and session	587	-0.474	0.636
EYFP	multi try success	laser	627	-1.101	0.275
EYFP	multi try success	interaction: laser and session	587	0.927	0.354
EYFP	drop in box	laser	365	-0.329	0.742
EYFP	drop in box	interaction: laser and session	612	0.51	0.61
EYFP	pellet knocked off	laser	64	0.509	0.612
EYFP	pellet knocked off	interaction: laser and session	587	-0.813	0.416
EYFP	used tongue	laser	NA	NA	NA
EYFP	used tongue	interaction: laser and session	NA	NA	NA
EYFP	trigger error	laser	600	0.113	0.91
EYFP	trigger error	interaction: laser and session	612	-0.089	0.929
EYFP	pellet remained	laser	46	0.008	0.993
EYFP	pellet remained	interaction: laser and session	612	-0.059	0.953
EYFP	ipsilateral paw	laser	58	0	1
EYFP	ipsilateral paw	interaction: laser and session	612	0	1
EYFP	laser error	laser	389	0	1
EYFP	laser error	interaction: laser and session	612	0	1
EYFP	tongue and paw	laser	NA	NA	NA
EYFP	tongue and paw	interaction: laser and session	NA	NA	NA
EYFP	paw through slot	laser	273	-1.489	0.138
EYFP	paw through slot	interaction: laser and session	587	0.77	0.442
