# Supplementary material for: Precisely timed dopamine signals establish distinct kinematic representations of skilled movements
Source: eLife. 2020 Nov 27;9:e61591. doi: 10.7554/eLife.61591 (PMC7861618; doi:10.7554/eLife.61591)
Supplement: Figure 2—source data 3. — A.xlsx file containing the statistical output of Wilcoxon ranksum tests for comparisons between ChR2 During and EYFP group averages in Figure 2G. [file elife-61591-fig2-data3.xlsx]

## Sheet: Sheet1
session	bin_number	z-value	p-value
R10	1	-1.00287	0.314219
R10	2	-1.10762	0.270396
R10	3	-1.05644	0.290754
R10	4	-0.528615	0.591142
R10	5	-0.31788	0.748873
R10	6	-0.897976	0.365346
R10	7	-0.740613	0.454856
R10	8	-1.27152	0.200777
R10	9	-1.26962	0.20202
R10	10	-1.32351	0.183372
R10	11	-1.37542	0.168143
R10	12	-1.11175	0.276301
R10	13	-1.37955	0.163947
R10	14	-1.44129	0.142036
R10	15	-1.4468	0.140482
R10	16	-1.32252	0.18244
R10	17	-1.27057	0.197824
R10	18	-1.00587	0.307071
R10	19	-0.848953	0.391453
R10	20	-1.33685	0.180886
R10	21	-1.27988	0.19798
R10	22	-1.10835	0.26791
R10	23	-0.291144	0.766434
R10	24	0	0.979332
R10	25	-0.116353	0.887335
R10	26	-0.232705	0.798757
R10	27	-0.46541	0.629992
R10	28	-0.194506	0.837163
R10	29	0.389444	0.679321
R10	30	0.453847	0.667999
L1	1	-1.85662	0.0568765
L1	2	-1.91464	0.0500389
L1	3	-2.2107	0.020202
L1	4	-2.33126	0.0164724
L1	5	-2.28753	0.0180264
L1	6	-2.46576	0.00870241
L1	7	-2.40484	0.0118104
L1	8	-2.33762	0.0142968
L1	9	-1.69478	0.0895105
L1	10	-1.23175	0.213209
L1	11	-0.934199	0.359285
L1	12	-1.16563	0.242113
L1	13	-1.1124	0.269153
L1	14	-1.16353	0.241803
L1	15	-1.80346	0.0665113
L1	16	-1.45836	0.141725
L1	17	-1.52223	0.131779
L1	18	-1.35208	0.170163
L1	19	-1.5487	0.114219
L1	20	-1.80479	0.0693473
L1	21	-2.1247	0.0320513
L1	22	-2.26105	0.0157343
L1	23	-2.12708	0.0291375
L1	24	-2.18908	0.0227273
L1	25	-1.92939	0.0472028
L1	26	-1.99371	0.0407925
L1	27	-2.06725	0.0361305
L1	28	-2.4439	0.00990676
L1	29	-2.58927	0.00582751
L1	30	-2.60382	0.00582751
L2	1	-2.75172	0.0034188
L2	2	-3.04446	0.000932401
L2	3	-2.96967	0.000932401
L2	4	-2.79246	0.0027972
L2	5	-2.85064	0.0024864
L2	6	-2.98047	0.0012432
L2	7	-2.86359	0.0018648
L2	8	-2.86098	0.0021756
L2	9	-2.74421	0.0034188
L2	10	-2.97776	0.0012432
L2	11	-3.0052	0.0012432
L2	12	-2.83368	0.0021756
L2	13	-3.01359	0.0012432
L2	14	-3.07268	0.000932401
L2	15	-3.07841	0.000932401
L2	16	-3.0164	0.000932401
L2	17	-3.19086	0.000621601
L2	18	-3.07841	0.000932401
L2	19	-3.18255	0.000621601
L2	20	-3.15238	0.000621601
L2	21	-3.10301	0.000621601
L2	22	-3.13469	0.000621601
L2	23	-3.01257	0.0011655
L2	24	-3.00909	0.0011655
L2	25	-3.00909	0.0011655
L2	26	-3.00909	0.0011655
L2	27	-2.82878	0.002331
L2	28	-2.80505	0.002331
L2	29	-2.74077	0.0034965
L2	30	-2.75236	0.0034965
L3	1	-3.15669	0.000621601
L3	2	-3.20287	0.0004662
L3	3	-3.15669	0.000621601
L3	4	-3.1591	0.000621601
L3	5	-3.10319	0.000932401
L3	6	-3.01078	0.0012432
L3	7	-3.01078	0.0012432
L3	8	-3.01359	0.0012432
L3	9	-3.02204	0.0012432
L3	10	-3.07268	0.000932401
L3	11	-3.06982	0.000932401
L3	12	-3.07841	0.000932401
L3	13	-3.13761	0.000621601
L3	14	-3.12885	0.000621601
L3	15	-3.19086	0.000621601
L3	16	-3.23328	0.000621601
L3	17	-3.13469	0.000932401
L3	18	-3.06982	0.000932401
L3	19	-3.17026	0.000621601
L3	20	-3.17026	0.000621601
L3	21	-3.16155	0.000621601
L3	22	-3.04446	0.000932401
L3	23	-2.82255	0.002664
L3	24	-2.81935	0.002664
L3	25	-2.42595	0.011988
L3	26	-2.31862	0.0151515
L3	27	-2.40581	0.0151515
L3	28	-2.40143	0.0126263
L3	29	-2.47973	0.010101
L3	30	-2.47973	0.010101
L4	1	-3.19597	0.000621601
L4	2	-3.15669	0.000621601
L4	3	-3.20287	0.0004662
L4	4	-3.10556	0.0010878
L4	5	-2.88258	0.0020202
L4	6	-2.83135	0.0021756
L4	7	-2.99162	0.0013986
L4	8	-3.04272	0.000932401
L4	9	-2.88258	0.0020202
L4	10	-2.71561	0.0040404
L4	11	-2.83368	0.0024864
L4	12	-2.94901	0.001554
L4	13	-2.77207	0.0034188
L4	14	-2.95175	0.001554
L4	15	-2.9311	0.0018648
L4	16	-2.9311	0.0018648
L4	17	-2.81147	0.0027972
L4	18	-2.75428	0.003108
L4	19	-2.6166	0.00524476
L4	20	-2.68511	0.00407925
L4	21	-2.74743	0.0034965
L4	22	-2.75379	0.00407925
L4	23	-2.48377	0.0104895
L4	24	-2.46263	0.011655
L4	25	-2.45571	0.0104895
L4	26	-2.26165	0.0151515
L4	27	-2.25365	0.0194805
L4	28	-2.26165	0.017316
L4	29	-2.18868	0.021645
L4	30	-2.18477	0.021645
L5	1	-2.9382	0.0017094
L5	2	-3.04968	0.0010878
L5	3	-3.05201	0.0010878
L5	4	-3.09611	0.000777001
L5	5	-3.04272	0.0010878
L5	6	-2.99847	0.001554
L5	7	-3.06611	0.0010878
L5	8	-2.97805	0.0013986
L5	9	-3.03581	0.000777001
L5	10	-2.99413	0.0012432
L5	11	-3.04725	0.000932401
L5	12	-3.05004	0.000932401
L5	13	-3.04725	0.000932401
L5	14	-3.04725	0.000932401
L5	15	-3.06982	0.000932401
L5	16	-3.00799	0.0012432
L5	17	-2.91145	0.001998
L5	18	-3.02695	0.001332
L5	19	-3.02695	0.001332
L5	20	-2.96322	0.001998
L5	21	-2.96322	0.001998
L5	22	-2.96322	0.001998
L5	23	-2.69384	0.004662
L5	24	-2.62336	0.00599401
L5	25	-2.62336	0.00599401
L5	26	-2.62964	0.00666001
L5	27	-2.69062	0.004662
L5	28	-2.62964	0.00666001
L5	29	-2.55609	0.00666001
L5	30	-2.35809	0.011655
O1	1	-2.50321	0.00823621
O1	2	-2.23185	0.0223776
O1	3	-2.01024	0.0393162
O1	4	-1.91735	0.0498834
O1	5	-1.69409	0.0846931
O1	6	-1.74703	0.0815851
O1	7	-1.84877	0.0612277
O1	8	-1.51669	0.12432
O1	9	-1.86501	0.0578089
O1	10	-1.28219	0.207304
O1	11	-1.63188	0.0963481
O1	12	-1.74371	0.0814297
O1	13	-1.63041	0.0994561
O1	14	-1.27757	0.199223
O1	15	-1.68256	0.0870241
O1	16	-1.62894	0.0991453
O1	17	-1.39246	0.158819
O1	18	-1.27757	0.198601
O1	19	-0.756975	0.439782
O1	20	-1.04907	0.283761
O1	21	-0.812271	0.415229
O1	22	-0.582288	0.552292
O1	23	-0.93082	0.348718
O1	24	-0.75493	0.447863
O1	25	-1.10535	0.266356
O1	26	-1.16039	0.243978
O1	27	-1.10237	0.26791
O1	28	-0.580715	0.553225
O1	29	-0.466252	0.632479
O1	30	-0.465831	0.633411
O2	1	-2.16894	0.0247086
O2	2	-1.98517	0.0456876
O2	3	-1.8684	0.0556333
O2	4	-1.69016	0.0916861
O2	5	-1.62894	0.0966589
O2	6	-1.51122	0.123388
O2	7	-1.62747	0.0957265
O2	8	-1.62894	0.0966589
O2	9	-1.86332	0.0547009
O2	10	-1.80673	0.0640249
O2	11	-1.75162	0.0764569
O2	12	-1.92329	0.0525253
O2	13	-1.92155	0.0503497
O2	14	-1.62088	0.0985681
O2	15	-1.55605	0.11322
O2	16	-1.29527	0.184482
O2	17	-1.16704	0.240426
O2	18	-0.779755	0.434898
O2	19	-0.452844	0.639361
O2	20	-0.454351	0.628705
O2	21	-0.454857	0.638029
O2	22	-0.454857	0.638029
O2	23	-0.574594	0.559441
O2	24	-0.788972	0.421911
O2	25	-1.1476	0.244755
O2	26	-1.29826	0.198135
O2	27	-1.00835	0.305361
O2	28	-1.21764	0.214452
O2	29	-0.935015	0.343823
O2	30	-0.787882	0.428904
O3	1	-2.22683	0.0220668
O3	2	-2.06468	0.0354312
O3	3	-1.91014	0.0564103
O3	4	-2.02387	0.0376068
O3	5	-1.9588	0.0470862
O3	6	-1.92504	0.04662
O3	7	-1.81331	0.0689977
O3	8	-1.80673	0.0634033
O3	9	-1.69324	0.0860917
O3	10	-1.46235	0.148563
O3	11	-0.650521	0.500167
O3	12	-1.03852	0.287712
O3	13	-1.11716	0.26973
O3	14	-1.08799	0.27972
O3	15	-1.08493	0.272727
O3	16	-1.08493	0.272727
O3	17	-0.978203	0.348485
O3	18	-1.28311	0.22028
O3	19	-1.43187	0.171329
O3	20	-1.38205	0.159674
O3	21	-1.59347	0.11655
O3	22	-1.38302	0.155844
O3	23	-1.53197	0.12987
O3	24	-0.643412	0.52381
O3	25	-0.65561	0.484848
O3	26	-0.65561	0.484848
O3	27	-0.551496	0.549784
O3	28	-0.551496	0.549784
O3	29	-0.65561	0.484848
O3	30	-0.461712	0.623377
O4	1	-2.58828	0.00652681
O4	2	-2.377	0.013209
O4	3	-2.33287	0.0149184
O4	4	-2.34877	0.0144522
O4	5	-2.00575	0.0391608
O4	6	-1.95733	0.0459984
O4	7	-1.8081	0.0629371
O4	8	-1.85988	0.0571873
O4	9	-1.91014	0.0536131
O4	10	-1.96764	0.048174
O4	11	-1.70174	0.0878011
O4	12	-2.11762	0.0285936
O4	13	-1.53527	0.121212
O4	14	-1.86834	0.0638695
O4	15	-1.92165	0.0525253
O4	16	-1.49809	0.136131
O4	17	-1.79863	0.0669775
O4	18	-1.85292	0.0612277
O4	19	-1.85569	0.0592075
O4	20	-1.42832	0.148563
O4	21	-1.43153	0.148407
O4	22	-1.48012	0.142657
O4	23	-1.40003	0.156022
O4	24	-1.33685	0.17871
O4	25	-1.16458	0.23683
O4	26	-1.05002	0.298057
O4	27	-1.30241	0.205439
O4	28	-1.2195	0.215695
O4	29	-1.27757	0.193939
O4	30	-1.51122	0.127117
O5	1	-1.27057	0.198757
O5	2	-0.914454	0.336286
O5	3	-1.11092	0.26418
O5	4	-1.10926	0.2662
O5	5	-1.00889	0.3108
O5	6	-0.848316	0.385237
O5	7	-0.796491	0.418337
O5	8	-0.848316	0.390521
O5	9	-0.741721	0.447708
O5	10	-0.900661	0.358974
O5	11	-0.899988	0.368454
O5	12	-1.16122	0.243046
O5	13	-0.897976	0.367521
O5	14	-1.16819	0.234033
O5	15	-0.950092	0.340016
O5	16	-1.05566	0.288423
O5	17	-0.897309	0.367677
O5	18	-1.05881	0.282051
O5	19	-1.16469	0.242735
O5	20	-1.79595	0.0700855
O5	21	-1.43153	0.151049
O5	22	-1.37032	0.166123
O5	23	-1.47902	0.137218
O5	24	-1.21763	0.223621
O5	25	-1.1068	0.282517
O5	26	-1.31762	0.193784
O5	27	-1.56793	0.112821
O5	28	-1.34169	0.187413
O5	29	-1.34169	0.179021
O5	30	-1.2217	0.219425
