# Supplementary material for: Precisely timed dopamine signals establish distinct kinematic representations of skilled movements
Source: eLife. 2020 Nov 27;9:e61591. doi: 10.7554/eLife.61591 (PMC7861618; doi:10.7554/eLife.61591)
Supplement: Figure 3—figure supplement 2—source data 3. — A .xlsx file containing the statistical output of linear mixed-effects models run for each outcome type (Figure 3—figure supplement 2C). Statistics are reported for effects of laser and interactions between laser and session number. [file elife-61591-fig3-figsupp2-data3.xlsx]

## Sheet: Sheet1
Group	Outcome	Effect	df	t	p
ChR2 Between	no pellet	laser	607	2.854	0.00446
ChR2 Between	no pellet	interaction: laser and session	612	-2.845	0.00459
ChR2 Between	first success	laser	106	-0.66	0.511
ChR2 Between	first success	interaction: laser and session	587	-0.34	0.734
ChR2 Between	multi try success	laser	627	0.805	0.424
ChR2 Between	multi try success	interaction: laser and session	587	-0.166	0.868
ChR2 Between	drop in box	laser	365	-0.227	0.821
ChR2 Between	drop in box	interaction: laser and session	612	-0.169	0.866
ChR2 Between	pellet knocked off	laser	64	-0.83	0.409
ChR2 Between	pellet knocked off	interaction: laser and session	587	1.711	0.088
ChR2 Between	used tongue	laser	NA	NA	NA
ChR2 Between	used tongue	interaction: laser and session	NA	NA	NA
ChR2 Between	trigger error	laser	600	-1.268	0.205
ChR2 Between	trigger error	interaction: laser and session	612	1.834	0.067
ChR2 Between	pellet remained	laser	46	0.607	0.547
ChR2 Between	pellet remained	interaction: laser and session	612	-0.599	0.549
ChR2 Between	ipsilateral paw	laser	58	0.059	0.953
ChR2 Between	ipsilateral paw	interaction: laser and session	612	0.171	0.864
ChR2 Between	laser error	laser	389	-0.939	0.349
ChR2 Between	laser error	interaction: laser and session	612	2.147	0.032
ChR2 Between	tongue and paw	laser	NA	NA	NA
ChR2 Between	tongue and paw	interaction: laser and session	NA	NA	NA
ChR2 Between	paw through slot	laser	273	0.603	0.547
ChR2 Between	paw through slot	interaction: laser and session	587	0.021	0.983
