# Supplementary material for: Precisely timed dopamine signals establish distinct kinematic representations of skilled movements
Source: eLife. 2020 Nov 27;9:e61591. doi: 10.7554/eLife.61591 (PMC7861618; doi:10.7554/eLife.61591)
Supplement: Figure 3—source data 3. — A .xlsx file containing the statistical output of Wilcoxon ranksum tests for comparisons between ChR2 During and ChR2 Between group averages in Figure 3C. [file elife-61591-fig3-data3.xlsx]

## Sheet: Sheet1
session	bin_number	z-value	p-value
R10	1	-0.895979	0.370264
R10	2	-0.950092	0.342066
R10	3	-0.531795	0.594868
R10	4	-0.425115	0.670753
R10	5	-0.211762	0.832293
R10	6	-0.370306	0.711154
R10	7	-0.316697	0.751473
R10	8	-0.737865	0.460597
R10	9	-0.36948	0.71177
R10	10	-0.527829	0.597618
R10	11	-0.421637	0.67329
R10	12	-0.158349	0.874182
R10	13	-0.633866	0.526168
R10	14	-0.263914	0.791846
R10	15	0	1
R10	16	0	1
R10	17	0.263914	0.791846
R10	18	0.742277	0.45792
R10	19	0.106359	0.915298
R10	20	0.317169	0.751115
R10	21	0	1
R10	22	-0.267109	0.789386
R10	23	0.0528221	0.957874
R10	24	0.159418	0.873339
R10	25	0.264111	0.791695
R10	26	0.264111	0.791695
R10	27	0	1
R10	28	0	1
R10	29	0.817424	0.413686
R10	30	0	1
L1	1	-1.16775	0.242908
L1	2	-1.22725	0.219728
L1	3	-1.39246	0.163782
L1	4	-1.4531	0.146197
L1	5	-1.34906	0.177319
L1	6	-1.57646	0.11492
L1	7	-1.57646	0.11492
L1	8	-1.63041	0.103015
L1	9	-1.5736	0.11558
L1	10	-1.04907	0.294147
L1	11	-0.701287	0.483124
L1	12	-0.875811	0.381133
L1	13	-1.10835	0.267709
L1	14	-0.936757	0.348884
L1	15	-1.28452	0.198959
L1	16	-1.05675	0.290624
L1	17	-0.876609	0.380699
L1	18	-0.840765	0.40048
L1	19	-0.781388	0.434574
L1	20	-0.965773	0.334158
L1	21	-1.48417	0.137764
L1	22	-1.49595	0.134666
L1	23	-1.37231	0.169968
L1	24	-0.942928	0.345718
L1	25	-0.942928	0.345718
L1	26	-1.15725	0.247169
L1	27	-1.66355	0.096202
L1	28	-1.51041	0.130939
L1	29	-1.94202	0.0521351
L1	30	-1.95286	0.0508357
L2	1	-2.57608	0.00745921
L2	2	-2.74921	0.0034188
L2	3	-2.51524	0.00777001
L2	4	-2.62505	0.00559441
L2	5	-2.44561	0.0111888
L2	6	-2.28126	0.0164724
L2	7	-2.51294	0.00839161
L2	8	-2.51066	0.00839161
L2	9	-2.62983	0.004662
L2	10	-2.57139	0.00683761
L2	11	-2.71309	0.003108
L2	12	-2.65411	0.00528361
L2	13	-2.94901	0.001554
L2	14	-2.95175	0.001554
L2	15	-3.00799	0.0012432
L2	16	-3.01078	0.0012432
L2	17	-3.0052	0.0012432
L2	18	-3.00799	0.0012432
L2	19	-3.07268	0.000932401
L2	20	-3.01359	0.001554
L2	21	-2.93543	0.0021756
L2	22	-2.83105	0.0021756
L2	23	-2.74903	0.0034188
L2	24	-2.6295	0.00559441
L2	25	-2.75165	0.0037296
L2	26	-2.59336	0.00641026
L2	27	-2.4247	0.011655
L2	28	-2.31777	0.0151515
L2	29	-2.31777	0.0151515
L2	30	-2.17291	0.02331
L3	1	-2.16337	0.0270396
L3	2	-2.48401	0.011655
L3	3	-2.13954	0.0285936
L3	4	-2.13954	0.0285936
L3	5	-2.02982	0.0394716
L3	6	-2.0282	0.0405594
L3	7	-2.0282	0.0405594
L3	8	-2.03145	0.0362082
L3	9	-2.14126	0.0285936
L3	10	-2.24746	0.0220668
L3	11	-2.25107	0.0198912
L3	12	-2.24746	0.0220668
L3	13	-2.70001	0.004662
L3	14	-2.69791	0.0045066
L3	15	-2.69791	0.0045066
L3	16	-2.74301	0.0043512
L3	17	-2.53998	0.00808081
L3	18	-2.53998	0.00916861
L3	19	-2.4725	0.00979021
L3	20	-2.4706	0.0104118
L3	21	-2.40765	0.0135198
L3	22	-2.53615	0.00808081
L3	23	-2.53615	0.00808081
L3	24	-2.53615	0.00808081
L3	25	-2.5385	0.00777001
L3	26	-2.48577	0.00990676
L3	27	-2.48864	0.00932401
L3	28	-2.71632	0.0034965
L3	29	-2.78413	0.00291375
L3	30	-2.78413	0.0034965
L4	1	-2.86647	0.0020202
L4	2	-2.56815	0.00683761
L4	3	-2.8292	0.0024864
L4	4	-2.66703	0.004662
L4	5	-2.50701	0.00916861
L4	6	-2.56229	0.00699301
L4	7	-2.51465	0.00885781
L4	8	-2.61766	0.00543901
L4	9	-2.32926	0.0158508
L4	10	-2.32201	0.0180264
L4	11	-2.4319	0.011655
L4	12	-2.53998	0.00854701
L4	13	-2.8292	0.0021756
L4	14	-2.88477	0.0020202
L4	15	-2.86201	0.0017094
L4	16	-2.41384	0.0122766
L4	17	-2.35898	0.0133644
L4	18	-2.08468	0.0307692
L4	19	-2.15346	0.0251748
L4	20	-2.27964	0.0177156
L4	21	-2.63958	0.00745921
L4	22	-2.52202	0.00963481
L4	23	-2.26137	0.018648
L4	24	-2.09457	0.032634
L4	25	-2.24218	0.020979
L4	26	-2.22655	0.016317
L4	27	-2.15473	0.025641
L4	28	-2.59652	0.00582751
L4	29	-2.24218	0.0174825
L4	30	-2.11548	0.0244755
L5	1	-2.94944	0.0017094
L5	2	-2.99162	0.0013986
L5	3	-2.8292	0.0024864
L5	4	-2.93596	0.0017094
L5	5	-2.8936	0.0020202
L5	6	-2.48401	0.00979021
L5	7	-2.88477	0.0021756
L5	8	-2.87169	0.0021756
L5	9	-2.87169	0.002331
L5	10	-2.92047	0.001554
L5	11	-2.92708	0.001554
L5	12	-2.86953	0.0021756
L5	13	-2.86953	0.0021756
L5	14	-2.86953	0.0021756
L5	15	-2.9382	0.0017094
L5	16	-2.88039	0.0020202
L5	17	-2.70001	0.004662
L5	18	-2.69464	0.00668221
L5	19	-2.74521	0.0043512
L5	20	-2.52763	0.00901321
L5	21	-2.52559	0.00901321
L5	22	-2.52559	0.00901321
L5	23	-2.4687	0.0111888
L5	24	-2.35709	0.0144522
L5	25	-2.46673	0.0111888
L5	26	-2.52559	0.010101
L5	27	-2.58466	0.00901321
L5	28	-2.6354	0.00668221
L5	29	-2.5805	0.00792541
L5	30	-2.33738	0.0158508
O1	1	-2.23861	0.0216006
O1	2	-2.12878	0.0281274
O1	3	-1.59059	0.10878
O1	4	-1.59418	0.108314
O1	5	-1.53642	0.117793
O1	6	-1.64732	0.0960373
O1	7	-1.90871	0.0547009
O1	8	-1.34169	0.175602
O1	9	-1.57218	0.110956
O1	10	-1.45704	0.150427
O1	11	-1.57076	0.111267
O1	12	-1.28103	0.194561
O1	13	-1.27988	0.198291
O1	14	-1.22502	0.220668
O1	15	-1.10735	0.277545
O1	16	-1.41019	0.152681
O1	17	-1.41019	0.152681
O1	18	-1.41489	0.152098
O1	19	-1.41489	0.152098
O1	20	-1.41964	0.159674
O1	21	-1.28199	0.19697
O1	22	-0.960428	0.335082
O1	23	-1.21924	0.220862
O1	24	-1.0909	0.272145
O1	25	-1.53838	0.121212
O1	26	-1.41019	0.153263
O1	27	-1.47428	0.139277
O1	28	-1.28057	0.19289
O1	29	-1.02673	0.300699
O1	30	-1.08849	0.269231
O2	1	-1.23175	0.217249
O2	2	-1.16942	0.240093
O2	3	-1.16283	0.238928
O2	4	-1.03595	0.310023
O2	5	-1.03362	0.297203
O2	6	-0.771757	0.437063
O2	7	-0.971208	0.331002
O2	8	-0.584044	0.544289
O2	9	-1.10571	0.268648
O2	10	-1.17747	0.217366
O2	11	-1.10445	0.262238
O2	12	-1.1007	0.265152
O2	13	-0.776966	0.438811
O2	14	-0.432148	0.65035
O2	15	-0.575394	0.55711
O2	16	-0.360123	0.713287
O2	17	-0.288907	0.731935
O2	18	-0.360627	0.701632
O2	19	-0.144861	0.840326
O2	20	-0.0722267	0.94289
O2	21	-0.288099	0.741259
O2	22	-0.0719243	0.903263
O2	23	-0.645039	0.517316
O2	24	-1.04634	0.285714
O2	25	-0.724386	0.461039
O2	26	-1.04819	0.316017
O2	27	-0.803455	0.417749
O2	28	-1.04449	0.287879
O2	29	-1.20518	0.220779
O2	30	-0.8838	0.380952
O3	1	-1.2372	0.208081
O3	2	-1.06279	0.295726
O3	3	-1.01194	0.307226
O3	4	-0.856052	0.38446
O3	5	-0.907479	0.366434
O3	6	-0.70842	0.472416
O3	7	-1.11138	0.261383
O3	8	-0.842665	0.388695
O3	9	-0.776966	0.418998
O3	10	-0.45323	0.645688
O3	11	-0.323669	0.720779
O3	12	-0.483779	0.621212
O3	13	-0.482924	0.621212
O3	14	-0.567436	0.545455
O3	15	-0.324249	0.755411
O3	16	-0.16126	0.852814
O3	17	0.0812079	0.935065
O3	18	0.0813544	0.915584
O3	19	0	0.961039
O3	20	-0.0836508	0.935065
O3	21	-0.0836508	0.935065
O3	22	0	0.961039
O3	23	-0.0812079	0.935065
O3	24	0.108465	0.793651
O3	25	0.108821	0.793651
O3	26	0.320206	0.690476
O3	27	0.212798	0.833333
O3	28	0	1
O3	29	0.317208	0.753968
O3	30	0.317208	0.753968
O4	1	-2.08399	0.032634
O4	2	-1.88651	0.0506161
O4	3	-1.96699	0.042624
O4	4	-1.84003	0.0579421
O4	5	-1.89286	0.0519481
O4	6	-1.23737	0.219114
O4	7	-1.31133	0.18315
O4	8	-1.36915	0.165834
O4	9	-1.10961	0.259074
O4	10	-1.17225	0.227106
O4	11	-0.779755	0.435564
O4	12	-0.714775	0.470196
O4	13	-0.390312	0.687313
O4	14	-0.390312	0.672661
O4	15	-1.10836	0.26307
O4	16	-1.30104	0.18981
O4	17	-1.36609	0.173826
O4	18	-1.4962	0.132534
O4	19	-1.57538	0.114552
O4	20	-1.18288	0.234432
O4	21	-0.985733	0.342324
O4	22	-0.911747	0.37296
O4	23	-0.854302	0.402264
O4	24	-0.908703	0.361638
O4	25	-0.32526	0.731935
O4	26	-0.327461	0.727273
O4	27	-0.65271	0.515485
O4	28	-0.585469	0.548119
O4	29	-0.648353	0.509491
O4	30	-0.589429	0.546121
O5	1	-0.266098	0.799378
O5	2	0	0.965812
O5	3	-0.105409	0.900233
O5	4	-0.105644	0.88951
O5	5	0	0.971873
O5	6	-0.105566	0.899301
O5	7	0.105566	0.896037
O5	8	-0.426725	0.667599
O5	9	-0.158821	0.858586
O5	10	-0.0527046	0.932556
O5	11	-0.263719	0.769386
O5	12	-0.317406	0.734266
O5	13	-0.318119	0.735664
O5	14	-0.264307	0.776068
O5	15	-0.158466	0.860451
O5	16	-0.158231	0.857964
O5	17	0.232705	0.795649
O5	18	0.782373	0.430236
O5	19	0.778888	0.42957
O5	20	0.454857	0.638695
O5	21	0.392509	0.679987
O5	22	0.196476	0.823843
O5	23	0.0650521	0.923077
O5	24	-0.454351	0.633367
O5	25	-0.584166	0.549451
O5	26	-0.324537	0.727273
O5	27	-0.324177	0.753247
O5	28	-0.390312	0.669997
O5	29	-0.783252	0.428238
O5	30	-0.650521	0.506827
