# Supplementary material for: Precisely timed dopamine signals establish distinct kinematic representations of skilled movements
Source: eLife. 2020 Nov 27;9:e61591. doi: 10.7554/eLife.61591 (PMC7861618; doi:10.7554/eLife.61591)
Supplement: Figure 4—figure supplement 1—source data 2. — A .xlsx file containing the statistical output of Wilcoxon ranksum tests for comparisons between Arch During and Arch Between group averages in Figure 4—figure supplement 1. [file elife-61591-fig4-figsupp1-data2.xlsx]

## Sheet: Sheet1
session	bin_number	z-value	p-value
R10	1	-1.51532	0.123699
R10	2	-1.93206	0.0463092
R10	3	-2.34189	0.0142968
R10	4	-2.39606	0.0114996
R10	5	-2.39606	0.0114996
R10	6	-2.04729	0.0344988
R10	7	-1.92155	0.0487956
R10	8	-1.62894	0.100699
R10	9	-1.33805	0.175602
R10	10	-1.74686	0.0804973
R10	11	-1.50986	0.126496
R10	12	-1.68711	0.0845377
R10	13	-1.6917	0.0860917
R10	14	-1.69324	0.0879565
R10	15	-1.68864	0.0842269
R10	16	-1.28199	0.19697
R10	17	-1.36656	0.170163
R10	18	-1.29284	0.185315
R10	19	-1.50622	0.129371
R10	20	-1.43649	0.146853
R10	21	-1.65426	0.0944056
R10	22	-1.38008	0.164336
R10	23	-1.14919	0.254079
R10	24	-1.22101	0.223776
R10	25	-1.36466	0.168998
R10	26	-1.29464	0.19697
R10	27	-1.50831	0.128205
R10	28	-1.45912	0.145022
R10	29	-1.38302	0.170996
R10	30	-1.14102	0.261905
L1	1	-1.2206	0.219425
L1	2	-1.45441	0.141725
L1	3	-1.57503	0.110023
L1	4	-1.75412	0.0757576
L1	5	-1.80681	0.0681818
L1	6	-2.11762	0.0291375
L1	7	-2.22655	0.0198135
L1	8	-2.30801	0.016317
L1	9	-2.52086	0.00815851
L1	10	-2.3735	0.013986
L1	11	-2.3735	0.013986
L1	12	-2.22372	0.0277778
L1	13	-2.19842	0.0242424
L1	14	-2.37855	0.0121212
L1	15	-2.37855	0.0121212
L1	16	-2.37309	0.0121212
L1	17	-2.37855	0.0121212
L1	18	-2.37309	0.0121212
L1	19	-2.29936	0.0181818
L1	20	-2.37855	0.0121212
L1	21	-2.37855	0.0121212
L1	22	-2.30022	0.0166667
L1	23	-2.29315	0.0166667
L1	24	-2.19198	0.0333333
L1	25	-2.19198	0.0333333
L1	26	-2.19198	0.0333333
L1	27	-2.19198	0.0333333
L1	28	-2.19198	0.0333333
L1	29	-2.30022	0.0166667
L1	30	-2.29315	0.0166667
L2	1	-1.63336	0.0966589
L2	2	-1.57503	0.115929
L2	3	-1.51395	0.127739
L2	4	-1.28804	0.201709
L2	5	-1.67214	0.0885781
L2	6	-1.48583	0.137529
L2	7	-1.29203	0.188228
L2	8	-1.29348	0.210956
L2	9	-1.15893	0.247086
L2	10	-1.16022	0.245338
L2	11	-0.772618	0.426573
L2	12	-0.773482	0.449883
L2	13	-0.451198	0.635198
L2	14	-0.648204	0.52972
L2	15	-0.712219	0.465035
L2	16	-0.712219	0.465035
L2	17	-0.905439	0.371795
L2	18	-0.725329	0.4662
L2	19	-0.724304	0.455711
L2	20	-0.86672	0.410256
L2	21	-0.937631	0.355478
L2	22	-0.937631	0.355478
L2	23	-1.08493	0.269231
L2	24	-1.22101	0.216783
L2	25	-0.984782	0.308081
L2	26	-0.81629	0.409091
L2	27	-0.820652	0.393939
L2	28	-0.822121	0.409091
L2	29	-0.89792	0.376263
L2	30	-0.822121	0.378788
L3	1	-1.27988	0.197047
L3	2	-1.45572	0.144522
L3	3	-1.63188	0.0975913
L3	4	-1.68533	0.0821678
L3	5	-1.54696	0.119464
L3	6	-1.23298	0.227273
L3	7	-0.905439	0.371795
L3	8	-0.917928	0.363636
L3	9	-1.10571	0.272145
L3	10	-1.36587	0.172494
L3	11	-1.35816	0.187063
L3	12	-1.29203	0.198718
L3	13	-0.507013	0.601399
L3	14	-0.359621	0.700466
L3	15	-0.577813	0.596737
L3	16	-0.718243	0.473193
L3	17	-0.871631	0.377622
L3	18	-1.24011	0.22028
L3	19	-1.08493	0.272727
L3	20	-0.865505	0.377622
L3	21	-1.00976	0.299534
L3	22	-0.93632	0.346154
L3	23	-1.22613	0.22028
L3	24	-1.51252	0.122378
L3	25	-1.65196	0.0932401
L3	26	-1.39015	0.164141
L3	27	-1.55095	0.113636
L3	28	-1.14483	0.247475
L3	29	-1.14483	0.247475
L3	30	-1.14483	0.247475
L4	1	-1.68407	0.0864025
L4	2	-1.80022	0.0680653
L4	3	-1.68864	0.0854701
L4	4	-1.35208	0.171329
L4	5	-1.35511	0.173077
L4	6	-1.16022	0.241259
L4	7	-1.08188	0.287879
L4	8	-1.15239	0.250583
L4	9	-1.07736	0.277389
L4	10	-1.00554	0.307692
L4	11	-0.861892	0.390443
L4	12	-0.933716	0.341492
L4	13	-1.00835	0.310023
L4	14	-1.00835	0.305361
L4	15	-1.0126	0.304196
L4	16	-1.08188	0.286713
L4	17	-0.937631	0.346154
L4	18	-1.07886	0.282051
L4	19	-1.08037	0.277389
L4	20	-1.15079	0.242424
L4	21	-1.0126	0.293706
L4	22	-1.0126	0.297203
L4	23	-0.865505	0.362471
L4	24	-0.792271	0.423077
L4	25	-0.865505	0.362471
L4	26	-0.93632	0.350816
L4	27	-0.79338	0.439394
L4	28	-0.865505	0.402098
L4	29	-0.792271	0.409091
L4	30	-0.577004	0.539627
L5	1	-0.36682	0.69697
L5	2	-0.748474	0.428571
L5	3	-0.748474	0.428571
L5	4	-0.858019	0.4
L5	5	-0.750766	0.457143
L5	6	-0.750766	0.457143
L5	7	-0.75308	0.447619
L5	8	-0.643514	0.514286
L5	9	-0.645497	0.533333
L5	10	-0.860663	0.428571
L5	11	-0.858019	0.380952
L5	12	-0.748474	0.428571
L5	13	-0.750766	0.466667
L5	14	-0.750766	0.466667
L5	15	-0.858019	0.4
L5	16	-1.07252	0.27619
L5	17	-0.858019	0.380952
L5	18	-0.858019	0.380952
L5	19	-0.858019	0.380952
L5	20	-0.755415	0.447619
L5	21	-1.07252	0.27619
L5	22	-1.17978	0.219048
L5	23	-1.29099	0.209524
L5	24	-1.41171	0.161905
L5	25	-1.29099	0.209524
L5	26	-1.39428	0.142857
L5	27	-1.60879	0.0952381
L5	28	-1.60879	0.0952381
L5	29	-1.60387	0.104762
L5	30	-1.50153	0.114286
O1	1	-1.65196	0.0979021
O1	2	-1.73101	0.0827506
O1	3	-2.16376	0.027972
O1	4	-1.80062	0.0641026
O1	5	-1.65196	0.0920746
O1	6	-1.87003	0.0547786
O1	7	-2.01951	0.0384615
O1	8	-2.08002	0.032634
O1	9	-2.0829	0.030303
O1	10	-2.20789	0.0227273
O1	11	-2.29373	0.0151515
O1	12	-1.99101	0.0454545
O1	13	-2.13369	0.0277778
O1	14	-2.13369	0.0277778
O1	15	-2.28966	0.0151515
O1	16	-2.29783	0.0151515
O1	17	-2.29783	0.0176768
O1	18	-1.96956	0.0454545
O1	19	-2.21181	0.0176768
O1	20	-2.13369	0.0277778
O1	21	-2.20398	0.020202
O1	22	-2.28561	0.0151515
O1	23	-1.9591	0.0454545
O1	24	-1.97309	0.0479798
O1	25	-1.9591	0.0454545
O1	26	-1.96257	0.0454545
O1	27	-1.99101	0.0454545
O1	28	-2.28561	0.0151515
O1	29	-2.28561	0.0151515
O1	30	-2.20789	0.0227273
O2	1	-2.16033	0.0270396
O2	2	-1.91982	0.049728
O2	3	-1.80509	0.0671329
O2	4	-1.51395	0.126807
O2	5	-1.45441	0.141725
O2	6	-1.45179	0.139239
O2	7	-1.33805	0.186791
O2	8	-1.51258	0.126807
O2	9	-1.67028	0.0856643
O2	10	-1.67214	0.0897436
O2	11	-1.34907	0.167832
O2	12	-1.41805	0.150932
O2	13	-1.74817	0.0815851
O2	14	-1.94739	0.0477855
O2	15	-1.94467	0.0501166
O2	16	-2.04798	0.0429293
O2	17	-2.12989	0.0252525
O2	18	-2.13752	0.0277778
O2	19	-1.96956	0.0454545
O2	20	-2.0553	0.0328283
O2	21	-1.92062	0.0424242
O2	22	-1.81609	0.0666667
O2	23	-1.81609	0.0666667
O2	24	-2.01666	0.0424242
O2	25	-1.82033	0.0727273
O2	26	-1.82033	0.0727273
O2	27	-1.82033	0.0727273
O2	28	-1.74136	0.1
O2	29	-1.74136	0.1
O2	30	-1.74136	0.1
O3	1	-1.16143	0.239938
O3	2	-1.04907	0.294949
O3	3	-1.47725	0.141103
O3	4	-1.34659	0.173737
O3	5	-1.92329	0.0519037
O3	6	-2.2107	0.0242424
O3	7	-1.73839	0.0815851
O3	8	-1.86716	0.0536131
O3	9	-1.87134	0.0553613
O3	10	-1.42444	0.163753
O3	11	-1.49937	0.138695
O3	12	-1.68153	0.0850816
O3	13	-1.80884	0.0617716
O3	14	-2.16376	0.0221445
O3	15	-1.80062	0.0617716
O3	16	-1.65657	0.0885781
O3	17	-1.87264	0.0547786
O3	18	-1.87264	0.0571096
O3	19	-1.55095	0.116162
O3	20	-1.55095	0.116162
O3	21	-1.47193	0.133838
O3	22	-1.3107	0.181818
O3	23	-1.23318	0.244949
O3	24	-0.81919	0.393939
O3	25	-0.825084	0.411616
O3	26	-0.738587	0.449495
O3	27	-0.660067	0.489899
O3	28	-0.738587	0.449495
O3	29	-0.670646	0.478788
O3	30	-0.670646	0.50303
O4	1	-1.28804	0.194561
O4	2	-1.39749	0.156954
O4	3	-1.04529	0.294328
O4	4	-0.873432	0.380109
O4	5	-0.761115	0.430458
O4	6	-0.994396	0.316084
O4	7	-1.06362	0.282207
O4	8	-1.23288	0.222222
O4	9	-1.409	0.157576
O4	10	-1.409	0.157576
O4	11	-1.45969	0.136131
O4	12	-1.33685	0.18244
O4	13	-1.40257	0.147319
O4	14	-1.28452	0.200777
O4	15	-1.16775	0.240559
O4	16	-1.10535	0.262937
O4	17	-0.873432	0.377933
O4	18	-0.759036	0.439472
O4	19	-0.817424	0.410256
O4	20	-1.10535	0.263559
O4	21	-1.16143	0.244289
O4	22	-1.02901	0.299534
O4	23	-0.864296	0.374126
O4	24	-0.937631	0.350816
O4	25	-1.23481	0.207459
O4	26	-1.38769	0.15404
O4	27	-1.38769	0.15404
O4	28	-1.5537	0.108586
O4	29	-1.5537	0.108586
O4	30	-1.55095	0.113636
O5	1	-0.815204	0.416783
O5	2	-0.761115	0.436674
O5	3	-0.758347	0.441958
O5	4	-0.815204	0.4115
O5	5	-1.16775	0.240559
O5	6	-1.22502	0.217249
O5	7	-1.45441	0.140482
O5	8	-1.45441	0.141725
O5	9	-1.45179	0.142347
O5	10	-1.80184	0.0755245
O5	11	-1.74845	0.0767677
O5	12	-1.92504	0.0478632
O5	13	-1.97443	0.0441336
O5	14	-2.0325	0.037296
O5	15	-1.97443	0.0438228
O5	16	-1.98708	0.0413753
O5	17	-1.86484	0.0524476
O5	18	-2.36692	0.011655
O5	19	-2.15174	0.0268065
O5	20	-1.79561	0.0722611
O5	21	-2.01669	0.037296
O5	22	-2.29838	0.016317
O5	23	-1.93657	0.0477855
O5	24	-1.65889	0.0967366
O5	25	-1.72618	0.0815851
O5	26	-1.67063	0.0862471
O5	27	-1.80062	0.0606061
O5	28	-1.45479	0.13986
O5	29	-1.52535	0.130536
O5	30	-1.58676	0.109557
