# Supplementary material for: Precisely timed dopamine signals establish distinct kinematic representations of skilled movements
Source: eLife. 2020 Nov 27;9:e61591. doi: 10.7554/eLife.61591 (PMC7861618; doi:10.7554/eLife.61591)
Supplement: Figure 4—figure supplement 3—source data 3. — A. xlsx file containing the statistical output of linear mixed-effects models run for each outcome type (Figure 4—figure supplement 3E). Statistics are reported for effects of laser and interactions between laser and session number. [file elife-61591-fig4-figsupp3-data3.xlsx]

## Sheet: Sheet1
Group	Outcome	Effect	df	t	p
Arch During	no pellet	laser	607	0.831	0.406
Arch During	no pellet	interaction: laser and session	612	-0.692	0.489
Arch During	first success	laser	106	0.567	0.572
Arch During	first success	interaction: laser and session	587	-0.263	0.793
Arch During	multi try success	laser	628	-0.805	0.424
Arch During	multi try success	interaction: laser and session	587	0.027	0.978
Arch During	drop in box	laser	366	0.269	0.788
Arch During	drop in box	interaction: laser and session	612	-0.689	0.491
Arch During	pellet knocked off	laser	64	-0.638	0.526
Arch During	pellet knocked off	interaction: laser and session	587	0.789	0.431
Arch During	used tongue	laser	NA	NA	NA
Arch During	used tongue	interaction: laser and session	NA	NA	NA
Arch During	trigger error	laser	600	-0.08	0.9363
Arch During	trigger error	interaction: laser and session	612	0.062	0.95
Arch During	pellet remained	laser	46	0.036	0.971
Arch During	pellet remained	interaction: laser and session	612	0.04	0.968
Arch During	ipsilateral paw	laser	58	0	1
Arch During	ipsilateral paw	interaction: laser and session	612	0	1
Arch During	laser error	laser	389	0	1
Arch During	laser error	interaction: laser and session	612	0	1
Arch During	tongue and paw	laser	NA	NA	NA
Arch During	tongue and paw	interaction: laser and session	NA	NA	NA
Arch During	paw through slot	laser	274	1.013	0.312
Arch During	paw through slot	interaction: laser and session	587	-0.161	0.872
Arch Between	no pellet	laser	607	1.373	0.17
Arch Between	no pellet	interaction: laser and session	612	-1.156	0.248
Arch Between	first success	laser	106	-0.679	0.498
Arch Between	first success	interaction: laser and session	587	-0.023	0.981
Arch Between	multi try success	laser	629	1.317	0.193
Arch Between	multi try success	interaction: laser and session	587	-1.474	0.141
Arch Between	drop in box	laser	366	0.343	0.732
Arch Between	drop in box	interaction: laser and session	612	-0.345	0.73
Arch Between	pellet knocked off	laser	64	-0.427	0.671
Arch Between	pellet knocked off	interaction: laser and session	587	1.15	0.251
Arch Between	used tongue	laser	NA	NA	NA
Arch Between	used tongue	interaction: laser and session	NA	NA	NA
Arch Between	trigger error	laser	600	-0.072	0.943
Arch Between	trigger error	interaction: laser and session	612	0.056	0.955
Arch Between	pellet remained	laser	46	-0.055	0.956
Arch Between	pellet remained	interaction: laser and session	612	0.204	0.839
Arch Between	ipsilateral paw	laser	58	0	1
Arch Between	ipsilateral paw	interaction: laser and session	612	0	1
Arch Between	laser error	laser	389	0.038	0.9697
Arch Between	laser error	interaction: laser and session	612	-0.104	0.917
Arch Between	tongue and paw	laser	NA	NA	NA
Arch Between	tongue and paw	interaction: laser and session	NA	NA	NA
Arch Between	paw through slot	laser	274	1.398	0.163
Arch Between	paw through slot	interaction: laser and session	587	-0.962	0.336
