# Supplementary material for: Precisely timed dopamine signals establish distinct kinematic representations of skilled movements
Source: eLife. 2020 Nov 27;9:e61591. doi: 10.7554/eLife.61591 (PMC7861618; doi:10.7554/eLife.61591)
Supplement: Figure 6—figure supplement 2—source data 3. — A .xlsx file containing the statistical output of Wilcoxon ranksum tests for comparisons between ChR2 During and ChR2 Between group averages in Figure 6—figure supplement 2 panels D, F, H, and J. [file elife-61591-fig6-figsupp2-data3.xlsx]

## Sheet: Sheet1
analysis	session	bin_number	z-value	p-value
final-z	R10	1	-0.868732	0.38073
final-z	R10	2	-0.868732	0.38073
final-z	R10	3	-0.521239	0.588967
final-z	R10	4	-0.63707	0.514685
final-z	R10	5	-0.752901	0.444444
final-z	R10	6	-0.63707	0.514685
final-z	R10	7	-0.752901	0.444444
final-z	R10	8	-0.752901	0.444444
final-z	R10	9	-0.984563	0.321368
final-z	R10	10	-0.984563	0.321368
final-z	R10	11	-0.868732	0.38073
final-z	R10	12	-0.868732	0.38073
final-z	R10	13	-1.21623	0.222222
final-z	R10	14	-0.868732	0.38073
final-z	R10	15	-0.63707	0.514685
final-z	R10	16	-0.63707	0.514685
final-z	R10	17	-0.521239	0.588967
final-z	R10	18	-0.173746	0.838539
final-z	R10	19	-0.0579155	0.925874
final-z	R10	20	-0.173746	0.838539
final-z	R10	21	-1.10039	0.269464
final-z	R10	22	-1.10039	0.269464
final-z	R10	23	-1.21623	0.222222
final-z	R10	24	-0.752901	0.444444
final-z	R10	25	-0.868732	0.38073
final-z	R10	26	-0.63707	0.514685
final-z	R10	27	-0.752901	0.444444
final-z	R10	28	-0.405408	0.669153
final-z	R10	29	-1.44789	0.146076
final-z	R10	30	-1.79538	0.0699301
final-z	L1	1	-1.10039	0.266667
final-z	L1	2	-1.10039	0.266667
final-z	L1	3	-0.984563	0.319503
final-z	L1	4	-1.10039	0.266667
final-z	L1	5	-1.10039	0.266667
final-z	L1	6	-0.984563	0.318881
final-z	L1	7	-0.868732	0.378555
final-z	L1	8	-0.868732	0.378555
final-z	L1	9	-0.63707	0.512199
final-z	L1	10	-0.868732	0.377933
final-z	L1	11	-0.521239	0.587413
final-z	L1	12	-0.63707	0.512199
final-z	L1	13	-0.521239	0.587413
final-z	L1	14	-0.521239	0.587413
final-z	L1	15	-1.44789	0.144522
final-z	L1	16	-1.67955	0.0895105
final-z	L1	17	-1.79538	0.0686869
final-z	L1	18	-2.02704	0.0385392
final-z	L1	19	-2.14287	0.0273504
final-z	L1	20	-2.72203	0.0037296
final-z	L1	21	-2.6062	0.00559441
final-z	L1	22	-2.6062	0.00559441
final-z	L1	23	-2.72203	0.0037296
final-z	L1	24	-2.72203	0.0037296
final-z	L1	25	-2.14287	0.0273504
final-z	L1	26	-2.37454	0.0133644
final-z	L1	27	-2.14287	0.0273504
final-z	L1	28	-2.37454	0.0133644
final-z	L1	29	-2.2587	0.0195804
final-z	L1	30	-2.14287	0.0273504
final-z	L2	1	-2.95369	0.0012432
final-z	L2	2	-3.18535	0.0003108
final-z	L2	3	-3.06952	0.000621601
final-z	L2	4	-2.95369	0.0012432
final-z	L2	5	-3.06952	0.000621601
final-z	L2	6	-3.06952	0.000621601
final-z	L2	7	-2.95369	0.0012432
final-z	L2	8	-2.95369	0.0012432
final-z	L2	9	-2.95369	0.0012432
final-z	L2	10	-2.83786	0.0021756
final-z	L2	11	-2.83786	0.0021756
final-z	L2	12	-2.72203	0.0037296
final-z	L2	13	-2.6062	0.00590521
final-z	L2	14	-2.72203	0.0037296
final-z	L2	15	-2.6062	0.00590521
final-z	L2	16	-2.6062	0.00590521
final-z	L2	17	-2.49037	0.00901321
final-z	L2	18	-2.2587	0.0198912
final-z	L2	19	-2.2587	0.0198912
final-z	L2	20	-2.37454	0.0136752
final-z	L2	21	-2.49037	0.00901321
final-z	L2	22	-2.6062	0.00590521
final-z	L2	23	-2.49037	0.00901321
final-z	L2	24	-2.37454	0.0136752
final-z	L2	25	-2.49037	0.00901321
final-z	L2	26	-2.6062	0.00590521
final-z	L2	27	-2.72203	0.0037296
final-z	L2	28	-2.72203	0.0037296
final-z	L2	29	-2.83786	0.0021756
final-z	L2	30	-2.83786	0.0021756
final-z	L3	1	-3.3106	0.0001554
final-z	L3	2	-3.3106	0.0001554
final-z	L3	3	-3.3106	0.0001554
final-z	L3	4	-3.3106	0.0001554
final-z	L3	5	-3.3106	0.0001554
final-z	L3	6	-3.3106	0.0001554
final-z	L3	7	-3.3106	0.0001554
final-z	L3	8	-3.3106	0.0001554
final-z	L3	9	-3.3106	0.0001554
final-z	L3	10	-3.3106	0.0001554
final-z	L3	11	-3.3106	0.0001554
final-z	L3	12	-3.3106	0.0001554
final-z	L3	13	-3.3106	0.0001554
final-z	L3	14	-3.3106	0.0001554
final-z	L3	15	-3.2055	0.0003108
final-z	L3	16	-3.3106	0.0001554
final-z	L3	17	-3.2055	0.0003108
final-z	L3	18	-3.2055	0.0003108
final-z	L3	19	-3.3106	0.0001554
final-z	L3	20	-3.3106	0.0001554
final-z	L3	21	-3.3106	0.0001554
final-z	L3	22	-3.3106	0.0001554
final-z	L3	23	-3.3106	0.0001554
final-z	L3	24	-3.3106	0.0001554
final-z	L3	25	-3.3106	0.0001554
final-z	L3	26	-3.3106	0.0001554
final-z	L3	27	-3.3106	0.0001554
final-z	L3	28	-3.3106	0.0001554
final-z	L3	29	-3.3106	0.0001554
final-z	L3	30	-3.3106	0.0001554
final-z	L4	1	-3.2055	0.0003108
final-z	L4	2	-3.3106	0.0001554
final-z	L4	3	-3.2055	0.0003108
final-z	L4	4	-3.2055	0.0003108
final-z	L4	5	-3.2055	0.0003108
final-z	L4	6	-3.1004	0.000621601
final-z	L4	7	-2.9953	0.0010878
final-z	L4	8	-2.9953	0.0010878
final-z	L4	9	-2.9953	0.0010878
final-z	L4	10	-2.9953	0.0010878
final-z	L4	11	-3.1004	0.000621601
final-z	L4	12	-3.1004	0.000621601
final-z	L4	13	-3.2055	0.0003108
final-z	L4	14	-3.1004	0.000621601
final-z	L4	15	-3.2055	0.0003108
final-z	L4	16	-3.2055	0.0003108
final-z	L4	17	-3.3106	0.0001554
final-z	L4	18	-3.3106	0.0001554
final-z	L4	19	-3.3106	0.0001554
final-z	L4	20	-3.1004	0.000621601
final-z	L4	21	-3.1004	0.000621601
final-z	L4	22	-2.9953	0.0010878
final-z	L4	23	-2.9953	0.0010878
final-z	L4	24	-3.1004	0.000621601
final-z	L4	25	-2.9953	0.0010878
final-z	L4	26	-2.9953	0.0010878
final-z	L4	27	-2.9953	0.0010878
final-z	L4	28	-2.9953	0.0010878
final-z	L4	29	-2.9953	0.0010878
final-z	L4	30	-3.1004	0.000621601
final-z	L5	1	-2.83786	0.0021756
final-z	L5	2	-2.95369	0.0012432
final-z	L5	3	-2.95369	0.0012432
final-z	L5	4	-3.06952	0.000621601
final-z	L5	5	-3.06952	0.000621601
final-z	L5	6	-3.06952	0.000621601
final-z	L5	7	-3.06952	0.000621601
final-z	L5	8	-3.06952	0.000621601
final-z	L5	9	-3.06952	0.000621601
final-z	L5	10	-2.95369	0.0012432
final-z	L5	11	-3.06952	0.000621601
final-z	L5	12	-2.95369	0.0012432
final-z	L5	13	-2.83786	0.0021756
final-z	L5	14	-2.83786	0.0021756
final-z	L5	15	-2.83786	0.0021756
final-z	L5	16	-2.83786	0.0021756
final-z	L5	17	-2.83786	0.0021756
final-z	L5	18	-2.83786	0.0021756
final-z	L5	19	-2.95369	0.0012432
final-z	L5	20	-2.95369	0.0012432
final-z	L5	21	-2.95369	0.0012432
final-z	L5	22	-2.83786	0.0021756
final-z	L5	23	-2.83786	0.0021756
final-z	L5	24	-2.95369	0.0012432
final-z	L5	25	-2.95369	0.0012432
final-z	L5	26	-2.95369	0.0012432
final-z	L5	27	-2.95369	0.0012432
final-z	L5	28	-2.95369	0.0012432
final-z	L5	29	-2.95369	0.0012432
final-z	L5	30	-2.95369	0.0012432
final-z	L6	1	-3.3106	0.0001554
final-z	L6	2	-3.3106	0.0001554
final-z	L6	3	-3.3106	0.0001554
final-z	L6	4	-3.3106	0.0001554
final-z	L6	5	-3.3106	0.0001554
final-z	L6	6	-3.3106	0.0001554
final-z	L6	7	-3.3106	0.0001554
final-z	L6	8	-3.3106	0.0001554
final-z	L6	9	-3.3106	0.0001554
final-z	L6	10	-3.3106	0.0001554
final-z	L6	11	-3.3106	0.0001554
final-z	L6	12	-3.3106	0.0001554
final-z	L6	13	-3.3106	0.0001554
final-z	L6	14	-3.3106	0.0001554
final-z	L6	15	-3.3106	0.0001554
final-z	L6	16	-3.3106	0.0001554
final-z	L6	17	-3.3106	0.0001554
final-z	L6	18	-3.3106	0.0001554
final-z	L6	19	-3.3106	0.0001554
final-z	L6	20	-3.3106	0.0001554
final-z	L6	21	-3.3106	0.0001554
final-z	L6	22	-3.3106	0.0001554
final-z	L6	23	-3.3106	0.0001554
final-z	L6	24	-3.2055	0.0003108
final-z	L6	25	-3.2055	0.0003108
final-z	L6	26	-3.1004	0.000621601
final-z	L6	27	-3.1004	0.000621601
final-z	L6	28	-3.2055	0.0003108
final-z	L6	29	-3.2055	0.0003108
final-z	L6	30	-3.2055	0.0003108
final-z	O1	1	-3.2055	0.0003108
final-z	O1	2	-3.2055	0.0003108
final-z	O1	3	-2.9953	0.0010878
final-z	O1	4	-3.2055	0.0003108
final-z	O1	5	-3.1004	0.000621601
final-z	O1	6	-3.2055	0.0003108
final-z	O1	7	-3.1004	0.000621601
final-z	O1	8	-3.1004	0.000621601
final-z	O1	9	-3.1004	0.000621601
final-z	O1	10	-2.9953	0.0010878
final-z	O1	11	-2.9953	0.0010878
final-z	O1	12	-2.8902	0.0018648
final-z	O1	13	-2.9953	0.0010878
final-z	O1	14	-2.9953	0.0010878
final-z	O1	15	-2.78511	0.0029526
final-z	O1	16	-2.78511	0.0029526
final-z	O1	17	-2.57491	0.00683761
final-z	O1	18	-2.57491	0.00683761
final-z	O1	19	-2.57491	0.00683761
final-z	O1	20	-2.57491	0.00683761
final-z	O1	21	-2.68001	0.0045066
final-z	O1	22	-2.25961	0.0198912
final-z	O1	23	-2.25961	0.0198912
final-z	O1	24	-2.15452	0.0270396
final-z	O1	25	-2.25961	0.0198912
final-z	O1	26	-2.25961	0.0198912
final-z	O1	27	-2.46981	0.010101
final-z	O1	28	-2.36471	0.0142968
final-z	O1	29	-2.46981	0.010101
final-z	O1	30	-2.57491	0.00683761
final-z	O2	1	-2.26173	0.019314
final-z	O2	2	-2.26173	0.019314
final-z	O2	3	-2.26173	0.019314
final-z	O2	4	-2.00324	0.041292
final-z	O2	5	-2.00324	0.041292
final-z	O2	6	-2.00324	0.041292
final-z	O2	7	-1.74476	0.0779221
final-z	O2	8	-1.74476	0.0779221
final-z	O2	9	-2.00324	0.041958
final-z	O2	10	-1.874	0.0579421
final-z	O2	11	-1.74476	0.0779221
final-z	O2	12	-1.874	0.0579421
final-z	O2	13	-1.874	0.0579421
final-z	O2	14	-2.13249	0.028638
final-z	O2	15	-2.13249	0.028638
final-z	O2	16	-2.13249	0.028638
final-z	O2	17	-2.13249	0.028638
final-z	O2	18	-2.13249	0.028638
final-z	O2	19	-2.13249	0.028638
final-z	O2	20	-2.13249	0.028638
final-z	O2	21	-2.00324	0.041958
final-z	O2	22	-2.00324	0.041958
final-z	O2	23	-2.13249	0.028638
final-z	O2	24	-1.874	0.0579421
final-z	O2	25	-1.874	0.0579421
final-z	O2	26	-1.61552	0.104562
final-z	O2	27	-1.874	0.0579421
final-z	O2	28	-2.00324	0.041958
final-z	O2	29	-1.61552	0.104562
final-z	O2	30	-1.74476	0.0792541
final-z	O3	1	-2.68624	0.00407925
final-z	O3	2	-2.55832	0.00699301
final-z	O3	3	-2.55832	0.00699301
final-z	O3	4	-2.30249	0.0168998
final-z	O3	5	-2.30249	0.0168998
final-z	O3	6	-2.55832	0.00699301
final-z	O3	7	-2.68624	0.00407925
final-z	O3	8	-2.68624	0.00407925
final-z	O3	9	-2.55832	0.00699301
final-z	O3	10	-2.4304	0.0110723
final-z	O3	11	-2.30249	0.0168998
final-z	O3	12	-2.30249	0.0168998
final-z	O3	13	-2.04666	0.0367133
final-z	O3	14	-2.04666	0.0367133
final-z	O3	15	-2.17457	0.025641
final-z	O3	16	-2.17457	0.025641
final-z	O3	17	-2.17457	0.025641
final-z	O3	18	-2.17457	0.025641
final-z	O3	19	-2.55832	0.00699301
final-z	O3	20	-2.55832	0.00699301
final-z	O3	21	-2.55832	0.00699301
final-z	O3	22	-2.55832	0.00699301
final-z	O3	23	-2.55832	0.00699301
final-z	O3	24	-2.55832	0.00699301
final-z	O3	25	-2.55832	0.00699301
final-z	O3	26	-2.4304	0.0110723
final-z	O3	27	-2.30249	0.0168998
final-z	O3	28	-2.17457	0.025641
final-z	O3	29	-1.79082	0.0699301
final-z	O3	30	-1.79082	0.0699301
final-z	O4	1	-2.52021	0.00799201
final-z	O4	2	-2.00324	0.041958
final-z	O4	3	-2.00324	0.041958
final-z	O4	4	-1.874	0.0579421
final-z	O4	5	-1.874	0.0579421
final-z	O4	6	-1.61552	0.104562
final-z	O4	7	-1.61552	0.104562
final-z	O4	8	-1.35704	0.174492
final-z	O4	9	-1.22779	0.21978
final-z	O4	10	-1.22779	0.21978
final-z	O4	11	-1.22779	0.21978
final-z	O4	12	-1.09855	0.271062
final-z	O4	13	-1.22779	0.21978
final-z	O4	14	-1.22779	0.21978
final-z	O4	15	-1.22779	0.21978
final-z	O4	16	-1.09855	0.271062
final-z	O4	17	-1.22779	0.21978
final-z	O4	18	-1.22779	0.21978
final-z	O4	19	-1.22779	0.21978
final-z	O4	20	-1.09855	0.271062
final-z	O4	21	-1.09855	0.271062
final-z	O4	22	-1.09855	0.271062
final-z	O4	23	-0.969312	0.331002
final-z	O4	24	-1.09855	0.271062
final-z	O4	25	-0.969312	0.331002
final-z	O4	26	-1.09855	0.271062
final-z	O4	27	-1.09855	0.271062
final-z	O4	28	-0.84007	0.39627
final-z	O4	29	-0.969312	0.331002
final-z	O4	30	-0.969312	0.331002
final-z	O5	1	-0.998434	0.314685
final-z	O5	2	-0.788237	0.424398
final-z	O5	3	-0.998434	0.314685
final-z	O5	4	-1.10353	0.266977
final-z	O5	5	-1.31373	0.186636
final-z	O5	6	-1.52393	0.125097
final-z	O5	7	-1.52393	0.125097
final-z	O5	8	-1.62902	0.100855
final-z	O5	9	-1.62902	0.100855
final-z	O5	10	-1.52393	0.125097
final-z	O5	11	-1.62902	0.100855
final-z	O5	12	-1.41883	0.154002
final-z	O5	13	-1.62902	0.100855
final-z	O5	14	-1.52393	0.125097
final-z	O5	15	-1.52393	0.125097
final-z	O5	16	-1.41883	0.154002
final-z	O5	17	-1.41883	0.154002
final-z	O5	18	-1.41883	0.154002
final-z	O5	19	-1.41883	0.154002
final-z	O5	20	-1.41883	0.154002
final-z	O5	21	-1.41883	0.154002
final-z	O5	22	-1.62902	0.100855
final-z	O5	23	-1.20863	0.224709
final-z	O5	24	-1.31373	0.186636
final-z	O5	25	-1.31373	0.186636
final-z	O5	26	-1.31373	0.186636
final-z	O5	27	-1.10353	0.266977
final-z	O5	28	-0.998434	0.314685
final-z	O5	29	-0.998434	0.314685
final-z	O5	30	-0.893336	0.366744
aperture	R10	1	-0.752901	0.444444
aperture	R10	2	-0.868732	0.38073
aperture	R10	3	-1.10039	0.269464
aperture	R10	4	-0.868732	0.38073
aperture	R10	5	-1.10039	0.269464
aperture	R10	6	-1.10039	0.269464
aperture	R10	7	-1.44789	0.146076
aperture	R10	8	-1.33206	0.181818
aperture	R10	9	-1.33206	0.181818
aperture	R10	10	-1.21623	0.222222
aperture	R10	11	-1.21623	0.222222
aperture	R10	12	-1.21623	0.222222
aperture	R10	13	-1.21623	0.222222
aperture	R10	14	-1.33206	0.181818
aperture	R10	15	-1.33206	0.181818
aperture	R10	16	-1.10039	0.269464
aperture	R10	17	-1.10039	0.269464
aperture	R10	18	-1.10039	0.269464
aperture	R10	19	-0.984563	0.321368
aperture	R10	20	-0.984563	0.321368
aperture	R10	21	-0.868732	0.38073
aperture	R10	22	-0.868732	0.38073
aperture	R10	23	-0.984563	0.321368
aperture	R10	24	-0.868732	0.38073
aperture	R10	25	-0.984563	0.321368
aperture	R10	26	-0.984563	0.321368
aperture	R10	27	-0.984563	0.321368
aperture	R10	28	-0.984563	0.321368
aperture	R10	29	-1.21623	0.222222
aperture	R10	30	-1.21623	0.222222
aperture	L1	1	-1.21623	0.220357
aperture	L1	2	-1.33206	0.179643
aperture	L1	3	-1.21623	0.220357
aperture	L1	4	-1.10039	0.266667
aperture	L1	5	-1.44789	0.144522
aperture	L1	6	-1.44789	0.144522
aperture	L1	7	-1.44789	0.144522
aperture	L1	8	-1.44789	0.144522
aperture	L1	9	-1.44789	0.144522
aperture	L1	10	-1.33206	0.179643
aperture	L1	11	-1.10039	0.266667
aperture	L1	12	-1.10039	0.266667
aperture	L1	13	-1.10039	0.266667
aperture	L1	14	-1.10039	0.266667
aperture	L1	15	-1.44789	0.144522
aperture	L1	16	-1.44789	0.144522
aperture	L1	17	-1.44789	0.144522
aperture	L1	18	-1.44789	0.144522
aperture	L1	19	-1.56372	0.114685
aperture	L1	20	-1.56372	0.114685
aperture	L1	21	-1.79538	0.0686869
aperture	L1	22	-1.79538	0.0686869
aperture	L1	23	-1.67955	0.0895105
aperture	L1	24	-1.56372	0.114685
aperture	L1	25	-1.44789	0.144522
aperture	L1	26	-1.44789	0.144522
aperture	L1	27	-1.44789	0.144522
aperture	L1	28	-1.56372	0.114685
aperture	L1	29	-1.44789	0.144522
aperture	L1	30	-1.44789	0.144522
aperture	L2	1	-2.14287	0.027972
aperture	L2	2	-2.37454	0.0136752
aperture	L2	3	-2.49037	0.00901321
aperture	L2	4	-2.49037	0.00901321
aperture	L2	5	-2.37454	0.0136752
aperture	L2	6	-2.37454	0.0136752
aperture	L2	7	-2.37454	0.0136752
aperture	L2	8	-2.37454	0.0136752
aperture	L2	9	-2.02704	0.0385392
aperture	L2	10	-2.02704	0.0385392
aperture	L2	11	-2.02704	0.0385392
aperture	L2	12	-1.67955	0.0895105
aperture	L2	13	-1.79538	0.0686869
aperture	L2	14	-2.14287	0.027972
aperture	L2	15	-2.14287	0.027972
aperture	L2	16	-2.02704	0.0385392
aperture	L2	17	-2.37454	0.0136752
aperture	L2	18	-2.37454	0.0136752
aperture	L2	19	-2.49037	0.00901321
aperture	L2	20	-2.37454	0.0136752
aperture	L2	21	-2.49037	0.00901321
aperture	L2	22	-2.2587	0.0198912
aperture	L2	23	-2.49037	0.00901321
aperture	L2	24	-2.2587	0.0198912
aperture	L2	25	-2.14287	0.027972
aperture	L2	26	-1.91121	0.0519037
aperture	L2	27	-1.91121	0.0519037
aperture	L2	28	-2.02704	0.0385392
aperture	L2	29	-2.02704	0.0385392
aperture	L2	30	-2.14287	0.027972
aperture	L3	1	-1.94432	0.048174
aperture	L3	2	-1.83922	0.0626263
aperture	L3	3	-1.83922	0.0626263
aperture	L3	4	-1.94432	0.048174
aperture	L3	5	-1.83922	0.0626263
aperture	L3	6	-1.83922	0.0626263
aperture	L3	7	-1.73412	0.0798757
aperture	L3	8	-1.73412	0.0798757
aperture	L3	9	-1.62902	0.100855
aperture	L3	10	-1.73412	0.0798757
aperture	L3	11	-1.83922	0.0626263
aperture	L3	12	-1.83922	0.0626263
aperture	L3	13	-1.94432	0.048174
aperture	L3	14	-1.94432	0.048174
aperture	L3	15	-2.04942	0.0368298
aperture	L3	16	-1.94432	0.048174
aperture	L3	17	-1.83922	0.0626263
aperture	L3	18	-1.83922	0.0626263
aperture	L3	19	-2.04942	0.0368298
aperture	L3	20	-1.83922	0.0626263
aperture	L3	21	-1.41883	0.154002
aperture	L3	22	-1.31373	0.186636
aperture	L3	23	-1.41883	0.154002
aperture	L3	24	-1.73412	0.0798757
aperture	L3	25	-1.73412	0.0798757
aperture	L3	26	-1.62902	0.100855
aperture	L3	27	-1.41883	0.154002
aperture	L3	28	-1.41883	0.154002
aperture	L3	29	-1.73412	0.0798757
aperture	L3	30	-1.62902	0.100855
aperture	L4	1	-2.8902	0.0018648
aperture	L4	2	-2.8902	0.0018648
aperture	L4	3	-2.78511	0.0029526
aperture	L4	4	-2.8902	0.0018648
aperture	L4	5	-2.68001	0.004662
aperture	L4	6	-2.57491	0.00683761
aperture	L4	7	-2.36471	0.0144522
aperture	L4	8	-2.36471	0.0144522
aperture	L4	9	-2.46981	0.0102564
aperture	L4	10	-2.36471	0.0144522
aperture	L4	11	-2.36471	0.0144522
aperture	L4	12	-2.25961	0.020202
aperture	L4	13	-2.25961	0.020202
aperture	L4	14	-2.25961	0.020202
aperture	L4	15	-2.25961	0.020202
aperture	L4	16	-2.04942	0.0368298
aperture	L4	17	-2.25961	0.020202
aperture	L4	18	-2.15452	0.0273504
aperture	L4	19	-2.36471	0.0144522
aperture	L4	20	-2.36471	0.0144522
aperture	L4	21	-2.15452	0.0273504
aperture	L4	22	-2.25961	0.020202
aperture	L4	23	-2.25961	0.020202
aperture	L4	24	-2.15452	0.0273504
aperture	L4	25	-2.25961	0.020202
aperture	L4	26	-2.36471	0.0144522
aperture	L4	27	-2.15452	0.0273504
aperture	L4	28	-2.04942	0.0368298
aperture	L4	29	-2.04942	0.0368298
aperture	L4	30	-2.04942	0.0368298
aperture	L5	1	-2.37454	0.0136752
aperture	L5	2	-2.37454	0.0136752
aperture	L5	3	-2.6062	0.00590521
aperture	L5	4	-2.37454	0.0136752
aperture	L5	5	-2.6062	0.00590521
aperture	L5	6	-2.6062	0.00590521
aperture	L5	7	-2.6062	0.00590521
aperture	L5	8	-2.6062	0.00590521
aperture	L5	9	-2.49037	0.00932401
aperture	L5	10	-2.49037	0.00932401
aperture	L5	11	-2.37454	0.0136752
aperture	L5	12	-2.37454	0.0136752
aperture	L5	13	-2.37454	0.0136752
aperture	L5	14	-2.72203	0.0037296
aperture	L5	15	-2.37454	0.0136752
aperture	L5	16	-2.2587	0.020202
aperture	L5	17	-2.2587	0.020202
aperture	L5	18	-2.2587	0.020202
aperture	L5	19	-2.37454	0.0136752
aperture	L5	20	-2.37454	0.0136752
aperture	L5	21	-2.37454	0.0136752
aperture	L5	22	-2.37454	0.0136752
aperture	L5	23	-2.2587	0.020202
aperture	L5	24	-2.37454	0.0136752
aperture	L5	25	-2.37454	0.0136752
aperture	L5	26	-2.37454	0.0136752
aperture	L5	27	-2.37454	0.0136752
aperture	L5	28	-2.2587	0.020202
aperture	L5	29	-2.2587	0.020202
aperture	L5	30	-2.02704	0.0391608
aperture	L6	1	-2.57491	0.00683761
aperture	L6	2	-2.57491	0.00683761
aperture	L6	3	-2.46981	0.0102564
aperture	L6	4	-2.36471	0.0144522
aperture	L6	5	-2.36471	0.0144522
aperture	L6	6	-2.36471	0.0144522
aperture	L6	7	-2.46981	0.0102564
aperture	L6	8	-2.46981	0.0102564
aperture	L6	9	-2.46981	0.0102564
aperture	L6	10	-2.36471	0.0144522
aperture	L6	11	-2.15452	0.0273504
aperture	L6	12	-2.36471	0.0144522
aperture	L6	13	-2.25961	0.020202
aperture	L6	14	-2.15452	0.0273504
aperture	L6	15	-2.15452	0.0273504
aperture	L6	16	-2.15452	0.0273504
aperture	L6	17	-2.15452	0.0273504
aperture	L6	18	-2.46981	0.0102564
aperture	L6	19	-2.46981	0.0102564
aperture	L6	20	-2.57491	0.00683761
aperture	L6	21	-2.57491	0.00683761
aperture	L6	22	-2.57491	0.00683761
aperture	L6	23	-2.46981	0.0102564
aperture	L6	24	-2.46981	0.0102564
aperture	L6	25	-2.46981	0.0102564
aperture	L6	26	-2.57491	0.00683761
aperture	L6	27	-2.46981	0.0102564
aperture	L6	28	-2.46981	0.0102564
aperture	L6	29	-2.46981	0.0102564
aperture	L6	30	-2.46981	0.0102564
aperture	O1	1	-1.94432	0.048174
aperture	O1	2	-1.94432	0.048174
aperture	O1	3	-1.94432	0.048174
aperture	O1	4	-1.83922	0.0626263
aperture	O1	5	-1.73412	0.0798757
aperture	O1	6	-1.83922	0.0626263
aperture	O1	7	-1.62902	0.100855
aperture	O1	8	-1.62902	0.100855
aperture	O1	9	-1.62902	0.100855
aperture	O1	10	-1.52393	0.125097
aperture	O1	11	-1.62902	0.100855
aperture	O1	12	-1.73412	0.0798757
aperture	O1	13	-1.52393	0.125097
aperture	O1	14	-1.41883	0.154002
aperture	O1	15	-1.31373	0.186636
aperture	O1	16	-1.10353	0.266977
aperture	O1	17	-1.10353	0.266977
aperture	O1	18	-1.10353	0.266977
aperture	O1	19	-1.10353	0.266977
aperture	O1	20	-1.10353	0.266977
aperture	O1	21	-1.20863	0.224709
aperture	O1	22	-1.41883	0.154002
aperture	O1	23	-1.31373	0.186636
aperture	O1	24	-1.31373	0.186636
aperture	O1	25	-1.41883	0.154002
aperture	O1	26	-1.62902	0.100855
aperture	O1	27	-1.52393	0.125097
aperture	O1	28	-1.31373	0.186636
aperture	O1	29	-1.41883	0.154002
aperture	O1	30	-1.41883	0.154002
aperture	O2	1	-1.874	0.0579421
aperture	O2	2	-1.874	0.0579421
aperture	O2	3	-1.74476	0.0792541
aperture	O2	4	-1.61552	0.104562
aperture	O2	5	-1.74476	0.0792541
aperture	O2	6	-1.74476	0.0792541
aperture	O2	7	-1.74476	0.0792541
aperture	O2	8	-1.61552	0.104562
aperture	O2	9	-1.61552	0.104562
aperture	O2	10	-1.61552	0.104562
aperture	O2	11	-1.61552	0.104562
aperture	O2	12	-1.61552	0.104562
aperture	O2	13	-1.74476	0.0792541
aperture	O2	14	-1.874	0.0579421
aperture	O2	15	-1.874	0.0579421
aperture	O2	16	-1.874	0.0579421
aperture	O2	17	-1.74476	0.0792541
aperture	O2	18	-1.74476	0.0792541
aperture	O2	19	-1.74476	0.0792541
aperture	O2	20	-1.74476	0.0792541
aperture	O2	21	-1.74476	0.0792541
aperture	O2	22	-1.74476	0.0792541
aperture	O2	23	-1.74476	0.0792541
aperture	O2	24	-1.22779	0.21978
aperture	O2	25	-1.22779	0.21978
aperture	O2	26	-1.35704	0.174492
aperture	O2	27	-1.35704	0.174492
aperture	O2	28	-1.35704	0.174492
aperture	O2	29	-1.61552	0.104562
aperture	O2	30	-1.48628	0.137196
aperture	O3	1	-1.40708	0.157343
aperture	O3	2	-1.53499	0.121795
aperture	O3	3	-1.40708	0.157343
aperture	O3	4	-1.27916	0.198135
aperture	O3	5	-1.27916	0.198135
aperture	O3	6	-1.27916	0.198135
aperture	O3	7	-1.27916	0.198135
aperture	O3	8	-1.27916	0.198135
aperture	O3	9	-1.27916	0.198135
aperture	O3	10	-1.27916	0.198135
aperture	O3	11	-1.27916	0.198135
aperture	O3	12	-1.27916	0.198135
aperture	O3	13	-1.27916	0.198135
aperture	O3	14	-1.40708	0.157343
aperture	O3	15	-1.27916	0.198135
aperture	O3	16	-1.15124	0.246503
aperture	O3	17	-1.15124	0.246503
aperture	O3	18	-1.02333	0.301282
aperture	O3	19	-1.02333	0.301282
aperture	O3	20	-1.02333	0.301282
aperture	O3	21	-1.15124	0.246503
aperture	O3	22	-1.15124	0.246503
aperture	O3	23	-1.27916	0.198135
aperture	O3	24	-1.15124	0.246503
aperture	O3	25	-1.15124	0.246503
aperture	O3	26	-1.15124	0.246503
aperture	O3	27	-1.27916	0.198135
aperture	O3	28	-1.40708	0.157343
aperture	O3	29	-1.27916	0.198135
aperture	O3	30	-1.53499	0.121795
aperture	O4	1	-1.09855	0.271062
aperture	O4	2	-0.84007	0.39627
aperture	O4	3	-0.969312	0.331002
aperture	O4	4	-0.969312	0.331002
aperture	O4	5	-0.969312	0.331002
aperture	O4	6	-0.84007	0.39627
aperture	O4	7	-0.84007	0.39627
aperture	O4	8	-0.710829	0.470862
aperture	O4	9	-0.84007	0.39627
aperture	O4	10	-0.969312	0.331002
aperture	O4	11	-0.84007	0.39627
aperture	O4	12	-0.710829	0.470862
aperture	O4	13	-0.84007	0.39627
aperture	O4	14	-0.710829	0.470862
aperture	O4	15	-0.710829	0.470862
aperture	O4	16	-0.710829	0.470862
aperture	O4	17	-0.452345	0.636031
aperture	O4	18	-0.710829	0.470862
aperture	O4	19	-0.710829	0.470862
aperture	O4	20	-0.581587	0.549451
aperture	O4	21	-0.581587	0.549451
aperture	O4	22	-0.84007	0.39627
aperture	O4	23	-0.84007	0.39627
aperture	O4	24	-0.84007	0.39627
aperture	O4	25	-0.84007	0.39627
aperture	O4	26	-0.969312	0.331002
aperture	O4	27	-0.969312	0.331002
aperture	O4	28	-0.84007	0.39627
aperture	O4	29	-1.22779	0.21978
aperture	O4	30	-1.09855	0.271062
orientation	R10	1	-0.752901	0.444444
orientation	R10	2	-0.752901	0.444444
orientation	R10	3	-0.63707	0.514685
orientation	R10	4	-0.63707	0.514685
orientation	R10	5	-0.63707	0.514685
orientation	R10	6	-0.521239	0.588967
orientation	R10	7	-0.63707	0.514685
orientation	R10	8	-0.752901	0.444444
orientation	R10	9	-0.752901	0.444444
orientation	R10	10	-0.752901	0.444444
orientation	R10	11	-0.752901	0.444444
orientation	R10	12	-0.752901	0.444444
orientation	R10	13	-0.752901	0.444444
orientation	R10	14	-0.63707	0.514685
orientation	R10	15	-0.752901	0.444444
orientation	R10	16	-0.752901	0.444444
orientation	R10	17	-0.752901	0.444444
orientation	R10	18	-0.63707	0.514685
orientation	R10	19	-0.63707	0.514685
orientation	R10	20	-0.521239	0.588967
orientation	R10	21	-0.63707	0.514685
orientation	R10	22	-0.63707	0.514685
orientation	R10	23	-0.63707	0.514685
orientation	R10	24	-0.63707	0.514685
orientation	R10	25	-0.63707	0.514685
orientation	R10	26	-0.752901	0.444444
orientation	R10	27	-0.752901	0.444444
orientation	R10	28	-0.752901	0.444444
orientation	R10	29	-0.63707	0.514685
orientation	R10	30	-0.752901	0.444444
orientation	L1	1	-1.33206	0.179643
orientation	L1	2	-1.33206	0.179643
orientation	L1	3	-1.33206	0.179643
orientation	L1	4	-1.33206	0.179643
orientation	L1	5	-1.21623	0.220357
orientation	L1	6	-1.33206	0.179643
orientation	L1	7	-1.21623	0.220357
orientation	L1	8	-1.21623	0.220357
orientation	L1	9	-1.21623	0.220357
orientation	L1	10	-1.10039	0.266667
orientation	L1	11	-1.10039	0.266667
orientation	L1	12	-1.10039	0.266667
orientation	L1	13	-1.21623	0.220357
orientation	L1	14	-1.21623	0.220357
orientation	L1	15	-1.21623	0.220357
orientation	L1	16	-1.21623	0.220357
orientation	L1	17	-1.21623	0.220357
orientation	L1	18	-1.21623	0.220357
orientation	L1	19	-1.21623	0.220357
orientation	L1	20	-1.21623	0.220357
orientation	L1	21	-1.10039	0.266667
orientation	L1	22	-1.10039	0.266667
orientation	L1	23	-1.21623	0.220357
orientation	L1	24	-1.21623	0.220357
orientation	L1	25	-1.21623	0.220357
orientation	L1	26	-1.21623	0.220357
orientation	L1	27	-1.21623	0.220357
orientation	L1	28	-1.21623	0.220357
orientation	L1	29	-1.21623	0.220357
orientation	L1	30	-1.10039	0.266667
orientation	L2	1	-2.14287	0.027972
orientation	L2	2	-2.14287	0.027972
orientation	L2	3	-1.91121	0.0519037
orientation	L2	4	-1.79538	0.0686869
orientation	L2	5	-1.67955	0.0895105
orientation	L2	6	-1.67955	0.0895105
orientation	L2	7	-1.56372	0.114685
orientation	L2	8	-1.56372	0.114685
orientation	L2	9	-1.44789	0.144522
orientation	L2	10	-1.44789	0.144522
orientation	L2	11	-1.44789	0.144522
orientation	L2	12	-1.44789	0.144522
orientation	L2	13	-1.44789	0.144522
orientation	L2	14	-1.44789	0.144522
orientation	L2	15	-1.33206	0.179643
orientation	L2	16	-1.44789	0.144522
orientation	L2	17	-1.67955	0.0895105
orientation	L2	18	-1.56372	0.114685
orientation	L2	19	-1.67955	0.0895105
orientation	L2	20	-1.79538	0.0686869
orientation	L2	21	-1.91121	0.0519037
orientation	L2	22	-1.91121	0.0519037
orientation	L2	23	-1.91121	0.0519037
orientation	L2	24	-1.67955	0.0895105
orientation	L2	25	-1.67955	0.0895105
orientation	L2	26	-1.67955	0.0895105
orientation	L2	27	-1.67955	0.0895105
orientation	L2	28	-1.67955	0.0895105
orientation	L2	29	-1.67955	0.0895105
orientation	L2	30	-1.67955	0.0895105
orientation	L3	1	-1.10353	0.266977
orientation	L3	2	-0.998434	0.314685
orientation	L3	3	-1.10353	0.266977
orientation	L3	4	-1.20863	0.224709
orientation	L3	5	-1.31373	0.186636
orientation	L3	6	-1.31373	0.186636
orientation	L3	7	-1.31373	0.186636
orientation	L3	8	-1.41883	0.154002
orientation	L3	9	-1.31373	0.186636
orientation	L3	10	-1.41883	0.154002
orientation	L3	11	-1.62902	0.100855
orientation	L3	12	-1.62902	0.100855
orientation	L3	13	-1.52393	0.125097
orientation	L3	14	-1.62902	0.100855
orientation	L3	15	-1.62902	0.100855
orientation	L3	16	-1.62902	0.100855
orientation	L3	17	-1.52393	0.125097
orientation	L3	18	-1.52393	0.125097
orientation	L3	19	-1.62902	0.100855
orientation	L3	20	-1.52393	0.125097
orientation	L3	21	-1.52393	0.125097
orientation	L3	22	-1.52393	0.125097
orientation	L3	23	-1.31373	0.186636
orientation	L3	24	-1.52393	0.125097
orientation	L3	25	-1.41883	0.154002
orientation	L3	26	-1.20863	0.224709
orientation	L3	27	-0.998434	0.314685
orientation	L3	28	-1.31373	0.186636
orientation	L3	29	-1.10353	0.266977
orientation	L3	30	-1.10353	0.266977
orientation	L4	1	-1.62902	0.100855
orientation	L4	2	-1.62902	0.100855
orientation	L4	3	-1.62902	0.100855
orientation	L4	4	-1.62902	0.100855
orientation	L4	5	-1.62902	0.100855
orientation	L4	6	-1.62902	0.100855
orientation	L4	7	-1.62902	0.100855
orientation	L4	8	-1.62902	0.100855
orientation	L4	9	-1.62902	0.100855
orientation	L4	10	-1.62902	0.100855
orientation	L4	11	-1.62902	0.100855
orientation	L4	12	-1.62902	0.100855
orientation	L4	13	-1.62902	0.100855
orientation	L4	14	-1.62902	0.100855
orientation	L4	15	-1.62902	0.100855
orientation	L4	16	-1.62902	0.100855
orientation	L4	17	-1.62902	0.100855
orientation	L4	18	-1.62902	0.100855
orientation	L4	19	-1.62902	0.100855
orientation	L4	20	-1.94432	0.048174
orientation	L4	21	-2.04942	0.0368298
orientation	L4	22	-1.94432	0.048174
orientation	L4	23	-1.83922	0.0626263
orientation	L4	24	-1.83922	0.0626263
orientation	L4	25	-1.83922	0.0626263
orientation	L4	26	-1.94432	0.048174
orientation	L4	27	-2.04942	0.0368298
orientation	L4	28	-2.25961	0.020202
orientation	L4	29	-2.04942	0.0368298
orientation	L4	30	-2.04942	0.0368298
orientation	L5	1	-1.56372	0.116239
orientation	L5	2	-1.56372	0.116239
orientation	L5	3	-1.56372	0.116239
orientation	L5	4	-1.56372	0.116239
orientation	L5	5	-1.56372	0.116239
orientation	L5	6	-1.56372	0.116239
orientation	L5	7	-1.56372	0.116239
orientation	L5	8	-1.56372	0.116239
orientation	L5	9	-1.56372	0.116239
orientation	L5	10	-1.56372	0.116239
orientation	L5	11	-1.56372	0.116239
orientation	L5	12	-1.56372	0.116239
orientation	L5	13	-1.56372	0.116239
orientation	L5	14	-1.56372	0.116239
orientation	L5	15	-1.56372	0.116239
orientation	L5	16	-1.56372	0.116239
orientation	L5	17	-1.67955	0.0904429
orientation	L5	18	-1.67955	0.0904429
orientation	L5	19	-1.67955	0.0904429
orientation	L5	20	-1.56372	0.116239
orientation	L5	21	-1.56372	0.116239
orientation	L5	22	-1.67955	0.0904429
orientation	L5	23	-1.56372	0.116239
orientation	L5	24	-1.44789	0.146076
orientation	L5	25	-1.44789	0.146076
orientation	L5	26	-1.67955	0.0904429
orientation	L5	27	-1.56372	0.116239
orientation	L5	28	-1.56372	0.116239
orientation	L5	29	-1.21623	0.222222
orientation	L5	30	-1.33206	0.181818
orientation	L6	1	-1.83922	0.0626263
orientation	L6	2	-1.73412	0.0798757
orientation	L6	3	-1.62902	0.100855
orientation	L6	4	-1.62902	0.100855
orientation	L6	5	-1.62902	0.100855
orientation	L6	6	-1.52393	0.125097
orientation	L6	7	-1.20863	0.224709
orientation	L6	8	-1.41883	0.154002
orientation	L6	9	-1.31373	0.186636
orientation	L6	10	-1.41883	0.154002
orientation	L6	11	-1.52393	0.125097
orientation	L6	12	-1.41883	0.154002
orientation	L6	13	-1.62902	0.100855
orientation	L6	14	-1.52393	0.125097
orientation	L6	15	-1.31373	0.186636
orientation	L6	16	-1.52393	0.125097
orientation	L6	17	-1.52393	0.125097
orientation	L6	18	-1.73412	0.0798757
orientation	L6	19	-1.62902	0.100855
orientation	L6	20	-1.41883	0.154002
orientation	L6	21	-1.10353	0.266977
orientation	L6	22	-1.10353	0.266977
orientation	L6	23	-1.52393	0.125097
orientation	L6	24	-1.10353	0.266977
orientation	L6	25	-1.31373	0.186636
orientation	L6	26	-1.83922	0.0626263
orientation	L6	27	-1.41883	0.154002
orientation	L6	28	-1.52393	0.125097
orientation	L6	29	-1.20863	0.224709
orientation	L6	30	-1.52393	0.125097
orientation	O1	1	-0.472942	0.622688
orientation	O1	2	-0.578041	0.552603
orientation	O1	3	-0.788237	0.424398
orientation	O1	4	-0.367844	0.696814
orientation	O1	5	-0.788237	0.424398
orientation	O1	6	-0.683139	0.485936
orientation	O1	7	-0.472942	0.622688
orientation	O1	8	-0.262746	0.773271
orientation	O1	9	-0.262746	0.773271
orientation	O1	10	-0.262746	0.773271
orientation	O1	11	-0.0525492	0.932867
orientation	O1	12	-0.0525492	0.932867
orientation	O1	13	-0.0525492	0.932867
orientation	O1	14	0	1
orientation	O1	15	-0.0525492	0.932867
orientation	O1	16	-0.0525492	0.932867
orientation	O1	17	-0.0525492	0.932867
orientation	O1	18	0	1
orientation	O1	19	-0.157647	0.852681
orientation	O1	20	-0.367844	0.696814
orientation	O1	21	-0.367844	0.696814
orientation	O1	22	-0.472942	0.622688
orientation	O1	23	-0.472942	0.622688
orientation	O1	24	-0.367844	0.696814
orientation	O1	25	-0.367844	0.696814
orientation	O1	26	-0.367844	0.696814
orientation	O1	27	-0.262746	0.773271
orientation	O1	28	-0.262746	0.773271
orientation	O1	29	-0.262746	0.773271
orientation	O1	30	-0.262746	0.773271
orientation	O2	1	-0.581587	0.549451
orientation	O2	2	-0.581587	0.549451
orientation	O2	3	-0.581587	0.549451
orientation	O2	4	-0.581587	0.549451
orientation	O2	5	-0.581587	0.549451
orientation	O2	6	-0.452345	0.636031
orientation	O2	7	-0.452345	0.636031
orientation	O2	8	-0.452345	0.636031
orientation	O2	9	-0.452345	0.636031
orientation	O2	10	-0.323104	0.725941
orientation	O2	11	-0.452345	0.636031
orientation	O2	12	-0.452345	0.636031
orientation	O2	13	-0.452345	0.636031
orientation	O2	14	-0.452345	0.636031
orientation	O2	15	-0.452345	0.636031
orientation	O2	16	-0.452345	0.636031
orientation	O2	17	-0.323104	0.725941
orientation	O2	18	-0.323104	0.725941
orientation	O2	19	-0.452345	0.636031
orientation	O2	20	-0.452345	0.636031
orientation	O2	21	-0.452345	0.636031
orientation	O2	22	-0.323104	0.725941
orientation	O2	23	-0.323104	0.725941
orientation	O2	24	-0.193862	0.821179
orientation	O2	25	-0.323104	0.725941
orientation	O2	26	-0.193862	0.821179
orientation	O2	27	-0.193862	0.821179
orientation	O2	28	-0.193862	0.821179
orientation	O2	29	-0.193862	0.821179
orientation	O2	30	-0.193862	0.821179
orientation	O3	1	0	0.9662
orientation	O3	2	0	0.9662
orientation	O3	3	0	0.9662
orientation	O3	4	0	0.9662
orientation	O3	5	0	0.9662
orientation	O3	6	0	0.9662
orientation	O3	7	0	0.9662
orientation	O3	8	0	0.9662
orientation	O3	9	-0.127916	0.869464
orientation	O3	10	-0.127916	0.869464
orientation	O3	11	-0.127916	0.869464
orientation	O3	12	-0.127916	0.869464
orientation	O3	13	-0.255832	0.772727
orientation	O3	14	-0.255832	0.772727
orientation	O3	15	-0.255832	0.772727
orientation	O3	16	-0.255832	0.772727
orientation	O3	17	-0.127916	0.869464
orientation	O3	18	-0.127916	0.869464
orientation	O3	19	0	0.9662
orientation	O3	20	-0.127916	0.869464
orientation	O3	21	0.127916	0.869464
orientation	O3	22	0.127916	0.869464
orientation	O3	23	0.127916	0.869464
orientation	O3	24	0	0.9662
orientation	O3	25	0	0.9662
orientation	O3	26	0	0.9662
orientation	O3	27	0.127916	0.869464
orientation	O3	28	0.127916	0.869464
orientation	O3	29	0	0.9662
orientation	O3	30	0	0.9662
orientation	O4	1	-0.581587	0.549451
orientation	O4	2	-0.581587	0.549451
orientation	O4	3	-0.581587	0.549451
orientation	O4	4	-0.581587	0.549451
orientation	O4	5	-0.581587	0.549451
orientation	O4	6	-0.452345	0.636031
orientation	O4	7	-0.581587	0.549451
orientation	O4	8	-0.710829	0.470862
orientation	O4	9	-0.710829	0.470862
orientation	O4	10	-0.710829	0.470862
orientation	O4	11	-0.710829	0.470862
orientation	O4	12	-0.710829	0.470862
orientation	O4	13	-0.710829	0.470862
orientation	O4	14	-0.710829	0.470862
orientation	O4	15	-0.710829	0.470862
orientation	O4	16	-0.710829	0.470862
orientation	O4	17	-0.710829	0.470862
orientation	O4	18	-0.710829	0.470862
orientation	O4	19	-0.581587	0.549451
orientation	O4	20	-0.452345	0.636031
orientation	O4	21	-0.452345	0.636031
orientation	O4	22	-0.452345	0.636031
orientation	O4	23	-0.452345	0.636031
orientation	O4	24	-0.452345	0.636031
orientation	O4	25	-0.452345	0.636031
orientation	O4	26	-0.581587	0.549451
orientation	O4	27	-0.581587	0.549451
orientation	O4	28	-0.710829	0.470862
orientation	O4	29	-0.581587	0.549451
orientation	O4	30	-0.581587	0.549451
velocity	R10	1	0.289577	0.750894
velocity	R10	2	0.405408	0.666977
velocity	R10	3	0.405408	0.666977
velocity	R10	4	0.405408	0.666977
velocity	R10	5	0.289577	0.750894
velocity	R10	6	0.173746	0.837296
velocity	R10	7	0.289577	0.750894
velocity	R10	8	0.405408	0.666977
velocity	R10	9	0.521239	0.587413
velocity	R10	10	0.405408	0.666977
velocity	R10	11	0.521239	0.587413
velocity	R10	12	0.289577	0.750894
velocity	R10	13	0.63707	0.512199
velocity	R10	14	0.63707	0.512199
velocity	R10	15	0.63707	0.512199
velocity	R10	16	0.63707	0.512199
velocity	R10	17	0.868732	0.377933
velocity	R10	18	0.521239	0.587413
velocity	R10	19	0.405408	0.666977
velocity	R10	20	0.63707	0.512199
velocity	R10	21	0.405408	0.666977
velocity	R10	22	0.289577	0.750894
velocity	R10	23	0.173746	0.837296
velocity	R10	24	0.0579155	0.925874
velocity	R10	25	0.0579155	0.925874
velocity	R10	26	0.0579155	0.925874
velocity	R10	27	0	1
velocity	R10	28	0	1
velocity	R10	29	-0.173746	0.838539
velocity	R10	30	-0.173746	0.838539
velocity	L1	1	-0.173746	0.837296
velocity	L1	2	-0.173746	0.837296
velocity	L1	3	0.0579155	0.925874
velocity	L1	4	-0.0579155	0.925874
velocity	L1	5	-0.0579155	0.925874
velocity	L1	6	-0.173746	0.837296
velocity	L1	7	-0.405408	0.666977
velocity	L1	8	-0.752901	0.442269
velocity	L1	9	-0.521239	0.587413
velocity	L1	10	-0.63707	0.512199
velocity	L1	11	-0.752901	0.442269
velocity	L1	12	-0.752901	0.442269
velocity	L1	13	-0.752901	0.442269
velocity	L1	14	-0.868732	0.377933
velocity	L1	15	-0.868732	0.377933
velocity	L1	16	-0.984563	0.319503
velocity	L1	17	-0.984563	0.319503
velocity	L1	18	-0.984563	0.319503
velocity	L1	19	-1.10039	0.266667
velocity	L1	20	-1.10039	0.266667
velocity	L1	21	-1.10039	0.266667
velocity	L1	22	-0.984563	0.319503
velocity	L1	23	-0.868732	0.377933
velocity	L1	24	-0.984563	0.319503
velocity	L1	25	-0.984563	0.319503
velocity	L1	26	-0.868732	0.377933
velocity	L1	27	-0.752901	0.442269
velocity	L1	28	-1.10039	0.266667
velocity	L1	29	-1.10039	0.266667
velocity	L1	30	-1.10039	0.266667
velocity	L2	1	-1.56372	0.114685
velocity	L2	2	-1.21623	0.220357
velocity	L2	3	-1.21623	0.220357
velocity	L2	4	-1.21623	0.220357
velocity	L2	5	-1.21623	0.220357
velocity	L2	6	-1.33206	0.179643
velocity	L2	7	-1.10039	0.266667
velocity	L2	8	-1.10039	0.266667
velocity	L2	9	-1.21623	0.220357
velocity	L2	10	-1.10039	0.266667
velocity	L2	11	-1.10039	0.266667
velocity	L2	12	-1.10039	0.266667
velocity	L2	13	-1.10039	0.266667
velocity	L2	14	-1.21623	0.220357
velocity	L2	15	-1.21623	0.220357
velocity	L2	16	-1.21623	0.220357
velocity	L2	17	-1.21623	0.220357
velocity	L2	18	-1.21623	0.220357
velocity	L2	19	-1.21623	0.220357
velocity	L2	20	-1.21623	0.220357
velocity	L2	21	-0.984563	0.319503
velocity	L2	22	-0.984563	0.319503
velocity	L2	23	-0.984563	0.319503
velocity	L2	24	-1.10039	0.266667
velocity	L2	25	-0.752901	0.442269
velocity	L2	26	-0.752901	0.442269
velocity	L2	27	-0.63707	0.512199
velocity	L2	28	-0.63707	0.512199
velocity	L2	29	-0.752901	0.442269
velocity	L2	30	-0.63707	0.512199
velocity	L3	1	-1.52393	0.125097
velocity	L3	2	-1.52393	0.125097
velocity	L3	3	-1.52393	0.125097
velocity	L3	4	-1.41883	0.154002
velocity	L3	5	-1.10353	0.266977
velocity	L3	6	-1.31373	0.186636
velocity	L3	7	-1.41883	0.154002
velocity	L3	8	-1.41883	0.154002
velocity	L3	9	-1.20863	0.224709
velocity	L3	10	-1.20863	0.224709
velocity	L3	11	-1.41883	0.154002
velocity	L3	12	-1.62902	0.100855
velocity	L3	13	-1.31373	0.186636
velocity	L3	14	-1.62902	0.100855
velocity	L3	15	-1.52393	0.125097
velocity	L3	16	-1.62902	0.100855
velocity	L3	17	-1.62902	0.100855
velocity	L3	18	-1.62902	0.100855
velocity	L3	19	-1.62902	0.100855
velocity	L3	20	-1.62902	0.100855
velocity	L3	21	-1.41883	0.154002
velocity	L3	22	-1.31373	0.186636
velocity	L3	23	-1.31373	0.186636
velocity	L3	24	-1.20863	0.224709
velocity	L3	25	-1.20863	0.224709
velocity	L3	26	-1.52393	0.125097
velocity	L3	27	-1.52393	0.125097
velocity	L3	28	-1.41883	0.154002
velocity	L3	29	-1.41883	0.154002
velocity	L3	30	-1.52393	0.125097
velocity	L4	1	-1.52393	0.125097
velocity	L4	2	-1.73412	0.0798757
velocity	L4	3	-1.83922	0.0626263
velocity	L4	4	-1.62902	0.100855
velocity	L4	5	-1.52393	0.125097
velocity	L4	6	-1.62902	0.100855
velocity	L4	7	-1.41883	0.154002
velocity	L4	8	-1.31373	0.186636
velocity	L4	9	-0.998434	0.314685
velocity	L4	10	-0.998434	0.314685
velocity	L4	11	-0.998434	0.314685
velocity	L4	12	-1.10353	0.266977
velocity	L4	13	-1.10353	0.266977
velocity	L4	14	-1.10353	0.266977
velocity	L4	15	-1.20863	0.224709
velocity	L4	16	-1.10353	0.266977
velocity	L4	17	-0.578041	0.552603
velocity	L4	18	-0.683139	0.485936
velocity	L4	19	-0.788237	0.424398
velocity	L4	20	-0.788237	0.424398
velocity	L4	21	-0.998434	0.314685
velocity	L4	22	-0.893336	0.366744
velocity	L4	23	-0.998434	0.314685
velocity	L4	24	-1.10353	0.266977
velocity	L4	25	-1.10353	0.266977
velocity	L4	26	-1.10353	0.266977
velocity	L4	27	-1.10353	0.266977
velocity	L4	28	-1.10353	0.266977
velocity	L4	29	-1.10353	0.266977
velocity	L4	30	-1.41883	0.154002
velocity	L5	1	-1.56372	0.116239
velocity	L5	2	-1.67955	0.0904429
velocity	L5	3	-1.79538	0.0699301
velocity	L5	4	-1.79538	0.0699301
velocity	L5	5	-1.79538	0.0699301
velocity	L5	6	-1.91121	0.0525253
velocity	L5	7	-1.91121	0.0525253
velocity	L5	8	-1.91121	0.0525253
velocity	L5	9	-2.02704	0.0391608
velocity	L5	10	-1.79538	0.0699301
velocity	L5	11	-1.79538	0.0699301
velocity	L5	12	-1.79538	0.0699301
velocity	L5	13	-1.79538	0.0699301
velocity	L5	14	-1.79538	0.0699301
velocity	L5	15	-1.79538	0.0699301
velocity	L5	16	-1.79538	0.0699301
velocity	L5	17	-1.91121	0.0525253
velocity	L5	18	-1.79538	0.0699301
velocity	L5	19	-1.91121	0.0525253
velocity	L5	20	-2.2587	0.020202
velocity	L5	21	-2.37454	0.0136752
velocity	L5	22	-2.49037	0.00932401
velocity	L5	23	-2.49037	0.00932401
velocity	L5	24	-2.49037	0.00932401
velocity	L5	25	-2.6062	0.00590521
velocity	L5	26	-2.49037	0.00932401
velocity	L5	27	-2.37454	0.0136752
velocity	L5	28	-2.49037	0.00932401
velocity	L5	29	-2.49037	0.00932401
velocity	L5	30	-2.49037	0.00932401
velocity	L6	1	-2.25961	0.020202
velocity	L6	2	-2.04942	0.0368298
velocity	L6	3	-1.83922	0.0626263
velocity	L6	4	-1.94432	0.048174
velocity	L6	5	-1.73412	0.0798757
velocity	L6	6	-1.73412	0.0798757
velocity	L6	7	-1.73412	0.0798757
velocity	L6	8	-1.73412	0.0798757
velocity	L6	9	-1.62902	0.100855
velocity	L6	10	-1.83922	0.0626263
velocity	L6	11	-1.73412	0.0798757
velocity	L6	12	-1.73412	0.0798757
velocity	L6	13	-1.41883	0.154002
velocity	L6	14	-1.52393	0.125097
velocity	L6	15	-1.62902	0.100855
velocity	L6	16	-1.62902	0.100855
velocity	L6	17	-1.73412	0.0798757
velocity	L6	18	-1.41883	0.154002
velocity	L6	19	-1.73412	0.0798757
velocity	L6	20	-2.15452	0.0273504
velocity	L6	21	-1.73412	0.0798757
velocity	L6	22	-1.94432	0.048174
velocity	L6	23	-1.94432	0.048174
velocity	L6	24	-1.73412	0.0798757
velocity	L6	25	-1.41883	0.154002
velocity	L6	26	-1.52393	0.125097
velocity	L6	27	-1.41883	0.154002
velocity	L6	28	-1.41883	0.154002
velocity	L6	29	-1.41883	0.154002
velocity	L6	30	-1.41883	0.154002
velocity	O1	1	-1.41883	0.154002
velocity	O1	2	-1.62902	0.100855
velocity	O1	3	-1.73412	0.0798757
velocity	O1	4	-1.73412	0.0798757
velocity	O1	5	-1.41883	0.154002
velocity	O1	6	-1.41883	0.154002
velocity	O1	7	-1.52393	0.125097
velocity	O1	8	-1.41883	0.154002
velocity	O1	9	-1.62902	0.100855
velocity	O1	10	-1.41883	0.154002
velocity	O1	11	-1.31373	0.186636
velocity	O1	12	-1.52393	0.125097
velocity	O1	13	-1.41883	0.154002
velocity	O1	14	-1.20863	0.224709
velocity	O1	15	-0.998434	0.314685
velocity	O1	16	-0.998434	0.314685
velocity	O1	17	-1.20863	0.224709
velocity	O1	18	-0.998434	0.314685
velocity	O1	19	-1.31373	0.186636
velocity	O1	20	-1.31373	0.186636
velocity	O1	21	-1.41883	0.154002
velocity	O1	22	-1.10353	0.266977
velocity	O1	23	-1.31373	0.186636
velocity	O1	24	-1.31373	0.186636
velocity	O1	25	-1.52393	0.125097
velocity	O1	26	-1.52393	0.125097
velocity	O1	27	-1.52393	0.125097
velocity	O1	28	-1.41883	0.154002
velocity	O1	29	-1.62902	0.100855
velocity	O1	30	-1.52393	0.125097
velocity	O2	1	-0.193862	0.821179
velocity	O2	2	-0.193862	0.821179
velocity	O2	3	-0.323104	0.725941
velocity	O2	4	-0.193862	0.821179
velocity	O2	5	-0.0646208	0.917749
velocity	O2	6	-0.0646208	0.917749
velocity	O2	7	-0.0646208	0.917749
velocity	O2	8	-0.0646208	0.917749
velocity	O2	9	-0.0646208	0.917749
velocity	O2	10	-0.193862	0.821179
velocity	O2	11	-0.323104	0.725941
velocity	O2	12	-0.452345	0.636031
velocity	O2	13	-0.0646208	0.917749
velocity	O2	14	-0.0646208	0.917749
velocity	O2	15	-0.193862	0.821179
velocity	O2	16	-0.193862	0.821179
velocity	O2	17	-0.323104	0.725941
velocity	O2	18	-0.581587	0.549451
velocity	O2	19	-0.323104	0.725941
velocity	O2	20	-0.452345	0.636031
velocity	O2	21	-0.323104	0.725941
velocity	O2	22	-0.452345	0.636031
velocity	O2	23	-0.581587	0.549451
velocity	O2	24	-0.452345	0.636031
velocity	O2	25	-0.452345	0.636031
velocity	O2	26	-0.452345	0.636031
velocity	O2	27	-0.452345	0.636031
velocity	O2	28	-0.581587	0.549451
velocity	O2	29	-0.710829	0.470862
velocity	O2	30	-0.581587	0.549451
velocity	O3	1	-0.63958	0.51049
velocity	O3	2	-0.767496	0.432984
velocity	O3	3	-0.511664	0.592075
velocity	O3	4	-0.511664	0.592075
velocity	O3	5	-0.511664	0.592075
velocity	O3	6	-0.511664	0.592075
velocity	O3	7	-0.511664	0.592075
velocity	O3	8	-0.511664	0.592075
velocity	O3	9	-0.383748	0.680653
velocity	O3	10	-0.383748	0.680653
velocity	O3	11	-0.383748	0.680653
velocity	O3	12	-0.383748	0.680653
velocity	O3	13	-0.383748	0.680653
velocity	O3	14	-0.255832	0.772727
velocity	O3	15	-0.511664	0.592075
velocity	O3	16	-0.383748	0.680653
velocity	O3	17	-0.383748	0.680653
velocity	O3	18	-0.255832	0.772727
velocity	O3	19	-0.255832	0.772727
velocity	O3	20	-0.511664	0.592075
velocity	O3	21	-0.511664	0.592075
velocity	O3	22	-0.511664	0.592075
velocity	O3	23	-0.511664	0.592075
velocity	O3	24	-0.63958	0.51049
velocity	O3	25	-0.63958	0.51049
velocity	O3	26	-0.63958	0.51049
velocity	O3	27	-0.63958	0.51049
velocity	O3	28	-0.767496	0.432984
velocity	O3	29	-0.767496	0.432984
velocity	O3	30	-0.895412	0.364219
velocity	O4	1	0	1
velocity	O4	2	0	1
velocity	O4	3	-0.193862	0.821179
velocity	O4	4	-0.323104	0.725941
velocity	O4	5	-0.193862	0.821179
velocity	O4	6	-0.323104	0.725941
velocity	O4	7	-0.323104	0.725941
velocity	O4	8	-0.323104	0.725941
velocity	O4	9	-0.323104	0.725941
velocity	O4	10	-0.323104	0.725941
velocity	O4	11	-0.193862	0.821179
velocity	O4	12	-0.193862	0.821179
velocity	O4	13	-0.0646208	0.917749
velocity	O4	14	-0.0646208	0.917749
velocity	O4	15	-0.0646208	0.917749
velocity	O4	16	-0.0646208	0.917749
velocity	O4	17	-0.0646208	0.917749
velocity	O4	18	-0.193862	0.821179
velocity	O4	19	-0.193862	0.821179
velocity	O4	20	-0.193862	0.821179
velocity	O4	21	-0.0646208	0.917749
velocity	O4	22	-0.0646208	0.917749
velocity	O4	23	0	1
velocity	O4	24	0	1
velocity	O4	25	0.0646208	0.917083
velocity	O4	26	0.0646208	0.917083
velocity	O4	27	0.0646208	0.917083
velocity	O4	28	0.0646208	0.917083
velocity	O4	29	0.0646208	0.917083
velocity	O4	30	0	1
