# Supplementary material for: Precisely timed dopamine signals establish distinct kinematic representations of skilled movements
Source: eLife. 2020 Nov 27;9:e61591. doi: 10.7554/eLife.61591 (PMC7861618; doi:10.7554/eLife.61591)
Supplement: Figure 6—figure supplement 8—source data 2. — A .xlsx file containing statistical output for paired t-test comparisons between ‘laser on’ and ‘retraining’ sessions and between ‘laser on’ and ‘occluded’ sessions for ChR2 During, ChR2 Between, and EYFP groups. ‘Z Block’ is the 10 groups of trials stratified by their maximum zdigit2 extent. [file elife-61591-fig6-figsupp8-data2.xlsx]

## Sheet: Sheet1
Analysis	Group	Comparison	Z Block	df	t	p
number_trials	ChR2 During	laser - retraining	1	5	-3.0741	0.0277
number_trials	ChR2 During	laser - retraining	2	5	-1.7912	0.1333
number_trials	ChR2 During	laser - retraining	3	5	-2.2962	0.0701
number_trials	ChR2 During	laser - retraining	4	5	-2.3269	0.0675
number_trials	ChR2 During	laser - retraining	5	5	-0.5691	0.5939
number_trials	ChR2 During	laser - retraining	6	5	2.8869	0.0343
number_trials	ChR2 During	laser - retraining	7	5	7.556	0.0006436
number_trials	ChR2 During	laser - retraining	8	5	4.2724	0.0079
number_trials	ChR2 During	laser - retraining	9	5	3.9785	0.0105
number_trials	ChR2 During	laser - retraining	10	5	4.5522	0.0061
number_trials	ChR2 During	laser - occluded	1	5	3.2573	0.0225
number_trials	ChR2 During	laser - occluded	2	5	1.8708	0.1203
number_trials	ChR2 During	laser - occluded	3	5	1.3144	0.2458
number_trials	ChR2 During	laser - occluded	4	5	0.9122	0.4035
number_trials	ChR2 During	laser - occluded	5	5	0.1225	0.9072
number_trials	ChR2 During	laser - occluded	6	5	-0.7633	0.4797
number_trials	ChR2 During	laser - occluded	7	5	-2.7668	0.0395
number_trials	ChR2 During	laser - occluded	8	5	-3.6322	0.015
number_trials	ChR2 During	laser - occluded	9	5	-3.0393	0.0288
number_trials	ChR2 During	laser - occluded	10	5	-2.8551	0.0356
number_trials	ChR2 Between	laser - retraining	1	7	0.4281	0.6815
number_trials	ChR2 Between	laser - retraining	2	7	0.6364	0.5447
number_trials	ChR2 Between	laser - retraining	3	7	0.8436	0.4268
number_trials	ChR2 Between	laser - retraining	4	7	1.8451	0.1075
number_trials	ChR2 Between	laser - retraining	5	7	0.6637	0.5281
number_trials	ChR2 Between	laser - retraining	6	7	0.8826	0.4068
number_trials	ChR2 Between	laser - retraining	7	7	-0.5198	0.6192
number_trials	ChR2 Between	laser - retraining	8	7	-0.2222	0.8305
number_trials	ChR2 Between	laser - retraining	9	7	-1.855	0.106
number_trials	ChR2 Between	laser - retraining	10	7	-0.9685	0.3651
number_trials	ChR2 Between	laser - occluded	1	7	-0.3505	0.7363
number_trials	ChR2 Between	laser - occluded	2	7	-0.735	0.4862
number_trials	ChR2 Between	laser - occluded	3	7	-0.7003	0.5063
number_trials	ChR2 Between	laser - occluded	4	7	-0.224	0.8291
number_trials	ChR2 Between	laser - occluded	5	7	0.327	0.7532
number_trials	ChR2 Between	laser - occluded	6	7	1.4499	0.1904
number_trials	ChR2 Between	laser - occluded	7	7	2.4477	0.0443
number_trials	ChR2 Between	laser - occluded	8	7	2.4398	0.0448
number_trials	ChR2 Between	laser - occluded	9	7	2.1853	0.0651
number_trials	ChR2 Between	laser - occluded	10	7	0.789	0.456
number_trials	EYFP	laser - retraining	1	5	0.9552	0.3833
number_trials	EYFP	laser - retraining	2	5	1.0067	0.3603
number_trials	EYFP	laser - retraining	3	5	1.3008	0.25
number_trials	EYFP	laser - retraining	4	5	2.7674	0.0395
number_trials	EYFP	laser - retraining	5	5	1.4677	0.2021
number_trials	EYFP	laser - retraining	6	5	0.392	0.7112
number_trials	EYFP	laser - retraining	7	5	-0.9402	0.3903
number_trials	EYFP	laser - retraining	8	5	-0.4416	0.6772
number_trials	EYFP	laser - retraining	9	5	0.3187	0.7629
number_trials	EYFP	laser - retraining	10	5	0.4677	0.6597
number_trials	EYFP	laser - occluded	1	5	-2.0868	0.0913
number_trials	EYFP	laser - occluded	2	5	-1.0583	0.3383
number_trials	EYFP	laser - occluded	3	5	1.0501	0.3418
number_trials	EYFP	laser - occluded	4	5	0.417	0.694
number_trials	EYFP	laser - occluded	5	5	-1.4821	0.1984
number_trials	EYFP	laser - occluded	6	5	-0.588	0.5821
number_trials	EYFP	laser - occluded	7	5	-0.9591	0.3815
number_trials	EYFP	laser - occluded	8	5	-0.24	0.8199
number_trials	EYFP	laser - occluded	9	5	-0.1375	0.896
number_trials	EYFP	laser - occluded	10	5	0.3027	0.7743
success rate	ChR2 During	laser - retraining	1	1	NA	NA
success rate	ChR2 During	laser - retraining	2	3	1.5753	0.2133
success rate	ChR2 During	laser - retraining	3	4	1.8198	0.1429
success rate	ChR2 During	laser - retraining	4	4	1.5055	0.2067
success rate	ChR2 During	laser - retraining	5	5	2.0925	0.0906
success rate	ChR2 During	laser - retraining	6	5	2.5361	0.0521
success rate	ChR2 During	laser - retraining	7	5	3.315	0.0211
success rate	ChR2 During	laser - retraining	8	5	2.9359	0.0324
success rate	ChR2 During	laser - retraining	9	4	-0.5428	0.6161
success rate	ChR2 During	laser - retraining	10	2	-1.3868	0.2999
success rate	ChR2 During	laser - occluded	1	4	-2.3177	0.0813
success rate	ChR2 During	laser - occluded	2	4	-1.7035	0.1637
success rate	ChR2 During	laser - occluded	3	5	-2.5902	0.0488
success rate	ChR2 During	laser - occluded	4	5	-1.6806	0.1537
success rate	ChR2 During	laser - occluded	5	5	-3.1202	0.0262
success rate	ChR2 During	laser - occluded	6	5	-3.2034	0.0239
success rate	ChR2 During	laser - occluded	7	5	-2.7267	0.0414
success rate	ChR2 During	laser - occluded	8	5	-1.5293	0.1867
success rate	ChR2 During	laser - occluded	9	4	1.2589	0.2765
success rate	ChR2 During	laser - occluded	10	2	7.171	0.0189
success rate	ChR2 Between	laser - retraining	1	2	-1	0.4226
success rate	ChR2 Between	laser - retraining	2	4	-0.1988	0.8521
success rate	ChR2 Between	laser - retraining	3	4	1.4071	0.2321
success rate	ChR2 Between	laser - retraining	4	5	0.4264	0.6876
success rate	ChR2 Between	laser - retraining	5	6	-0.0296	0.9774
success rate	ChR2 Between	laser - retraining	6	7	1.9568	0.0912
success rate	ChR2 Between	laser - retraining	7	7	0.0067	0.9948
success rate	ChR2 Between	laser - retraining	8	7	-0.5457	0.6022
success rate	ChR2 Between	laser - retraining	9	6	2.7438	0.0336
success rate	ChR2 Between	laser - retraining	10	6	1.751	0.1305
success rate	ChR2 Between	laser - occluded	1	2	-0.609	0.6045
success rate	ChR2 Between	laser - occluded	2	2	-1.0535	0.4026
success rate	ChR2 Between	laser - occluded	3	5	1.1591	0.2988
success rate	ChR2 Between	laser - occluded	4	5	-0.7165	0.5057
success rate	ChR2 Between	laser - occluded	5	5	0.2491	0.8132
success rate	ChR2 Between	laser - occluded	6	6	-0.7425	0.4858
success rate	ChR2 Between	laser - occluded	7	6	-1.329	0.2322
success rate	ChR2 Between	laser - occluded	8	6	-0.8001	0.4541
success rate	ChR2 Between	laser - occluded	9	7	-2.286	0.0561
success rate	ChR2 Between	laser - occluded	10	6	-0.213	0.8384
success rate	EYFP	laser - retraining	1	NA	NA	NA
success rate	EYFP	laser - retraining	2	2	-0.7051	0.5538
success rate	EYFP	laser - retraining	3	4	-0.1213	0.9093
success rate	EYFP	laser - retraining	4	4	0.7271	0.5074
success rate	EYFP	laser - retraining	5	5	0.1683	0.8729
success rate	EYFP	laser - retraining	6	5	2.1878	0.0803
success rate	EYFP	laser - retraining	7	5	-0.08	0.9394
success rate	EYFP	laser - retraining	8	4	-2.2027	0.0924
success rate	EYFP	laser - retraining	9	4	0.8551	0.4407
success rate	EYFP	laser - retraining	10	2	-0.9876	0.4275
success rate	EYFP	laser - occluded	1	2	1	0.4226
success rate	EYFP	laser - occluded	2	2	-1	0.4226
success rate	EYFP	laser - occluded	3	4	-1.0374	0.3582
success rate	EYFP	laser - occluded	4	4	-0.9621	0.3905
success rate	EYFP	laser - occluded	5	5	-0.0258	0.9804
success rate	EYFP	laser - occluded	6	4	-0.9237	0.4079
success rate	EYFP	laser - occluded	7	5	0.8311	0.4438
success rate	EYFP	laser - occluded	8	5	-0.1833	0.8618
success rate	EYFP	laser - occluded	9	5	-0.5817	0.586
success rate	EYFP	laser - occluded	10	4	-0.4337	0.6868
aperture	ChR2 During	laser - retraining	1	1	2.6191	0.2322
aperture	ChR2 During	laser - retraining	2	4	1.0843	0.3392
aperture	ChR2 During	laser - retraining	3	4	1.8663	0.1354
aperture	ChR2 During	laser - retraining	4	4	1.1273	0.3227
aperture	ChR2 During	laser - retraining	5	5	0.9564	0.3828
aperture	ChR2 During	laser - retraining	6	5	0.9763	0.3737
aperture	ChR2 During	laser - retraining	7	5	-0.0201	0.9847
aperture	ChR2 During	laser - retraining	8	5	-1.2704	0.2598
aperture	ChR2 During	laser - retraining	9	4	-1.4737	0.2146
aperture	ChR2 During	laser - retraining	10	2	-2.8341	0.1052
aperture	ChR2 During	laser - occluded	1	4	-2.1013	0.1035
aperture	ChR2 During	laser - occluded	2	4	-1.9236	0.1267
aperture	ChR2 During	laser - occluded	3	5	-2.4496	0.058
aperture	ChR2 During	laser - occluded	4	5	-2.2029	0.0788
aperture	ChR2 During	laser - occluded	5	5	-1.7899	0.1335
aperture	ChR2 During	laser - occluded	6	5	-1.5923	0.1722
aperture	ChR2 During	laser - occluded	7	5	-1.1328	0.3087
aperture	ChR2 During	laser - occluded	8	5	1.1496	0.3023
aperture	ChR2 During	laser - occluded	9	4	-0.1884	0.8598
aperture	ChR2 During	laser - occluded	10	2	0.6677	0.573
aperture	ChR2 Between	laser - retraining	1	2	-0.3991	0.7284
aperture	ChR2 Between	laser - retraining	2	4	0.7801	0.4789
aperture	ChR2 Between	laser - retraining	3	4	0.9496	0.3961
aperture	ChR2 Between	laser - retraining	4	5	1.2642	0.2619
aperture	ChR2 Between	laser - retraining	5	6	0.3672	0.7261
aperture	ChR2 Between	laser - retraining	6	7	0.3807	0.7147
aperture	ChR2 Between	laser - retraining	7	7	0.5721	0.5851
aperture	ChR2 Between	laser - retraining	8	7	0.2602	0.8022
aperture	ChR2 Between	laser - retraining	9	6	1.9591	0.0978
aperture	ChR2 Between	laser - retraining	10	6	2.236	0.0667
aperture	ChR2 Between	laser - occluded	1	2	0.299	0.7931
aperture	ChR2 Between	laser - occluded	2	2	-0.6812	0.566
aperture	ChR2 Between	laser - occluded	3	5	-0.1132	0.9143
aperture	ChR2 Between	laser - occluded	4	5	-0.6955	0.5177
aperture	ChR2 Between	laser - occluded	5	5	-0.4972	0.6401
aperture	ChR2 Between	laser - occluded	6	6	-1.1088	0.31
aperture	ChR2 Between	laser - occluded	7	6	-1.4045	0.2098
aperture	ChR2 Between	laser - occluded	8	6	-0.302	0.7728
aperture	ChR2 Between	laser - occluded	9	7	-0.4497	0.6665
aperture	ChR2 Between	laser - occluded	10	6	0.5339	0.6126
aperture	EYFP	laser - retraining	1	1	1.0754	0.4769
aperture	EYFP	laser - retraining	2	2	0.3078	0.7873
aperture	EYFP	laser - retraining	3	4	-0.2181	0.838
aperture	EYFP	laser - retraining	4	4	1.1447	0.3162
aperture	EYFP	laser - retraining	5	5	1.4279	0.2127
aperture	EYFP	laser - retraining	6	5	1.167	0.2958
aperture	EYFP	laser - retraining	7	5	2.7184	0.0419
aperture	EYFP	laser - retraining	8	4	4.8464	0.0084
aperture	EYFP	laser - retraining	9	4	2.3969	0.0746
aperture	EYFP	laser - retraining	10	2	4.4488	0.047
aperture	EYFP	laser - occluded	1	2	0.301	0.7918
aperture	EYFP	laser - occluded	2	2	-0.8865	0.4689
aperture	EYFP	laser - occluded	3	4	0.5923	0.5855
aperture	EYFP	laser - occluded	4	4	-0.0096	0.9928
aperture	EYFP	laser - occluded	5	5	1.6361	0.1628
aperture	EYFP	laser - occluded	6	4	-0.251	0.8142
aperture	EYFP	laser - occluded	7	5	0.5647	0.5967
aperture	EYFP	laser - occluded	8	5	-0.679	0.5273
aperture	EYFP	laser - occluded	9	5	-0.6154	0.5652
aperture	EYFP	laser - occluded	10	4	-0.7766	0.4808
orientation	ChR2 During	laser - retraining	1	1	-0.3502	0.7855
orientation	ChR2 During	laser - retraining	2	4	1.1846	0.3018
orientation	ChR2 During	laser - retraining	3	4	1.3017	0.2629
orientation	ChR2 During	laser - retraining	4	4	1.2873	0.2674
orientation	ChR2 During	laser - retraining	5	5	1.323	0.2431
orientation	ChR2 During	laser - retraining	6	5	2.4522	0.0578
orientation	ChR2 During	laser - retraining	7	5	1.2339	0.2721
orientation	ChR2 During	laser - retraining	8	5	1.6926	0.1513
orientation	ChR2 During	laser - retraining	9	4	2.0319	0.112
orientation	ChR2 During	laser - retraining	10	2	0.8589	0.4809
orientation	ChR2 During	laser - occluded	1	4	0.3316	0.7568
orientation	ChR2 During	laser - occluded	2	4	-0.3176	0.7666
orientation	ChR2 During	laser - occluded	3	5	-2.728	0.0414
orientation	ChR2 During	laser - occluded	4	5	-1.6676	0.1563
orientation	ChR2 During	laser - occluded	5	5	-1.5446	0.1831
orientation	ChR2 During	laser - occluded	6	5	-4.5093	0.0063
orientation	ChR2 During	laser - occluded	7	5	-1.5013	0.1936
orientation	ChR2 During	laser - occluded	8	5	-1.2689	0.2603
orientation	ChR2 During	laser - occluded	9	4	-2.829	0.0474
orientation	ChR2 During	laser - occluded	10	2	-8.7131	0.0129
orientation	ChR2 Between	laser - retraining	1	2	1.3369	0.313
orientation	ChR2 Between	laser - retraining	2	4	-0.1729	0.8711
orientation	ChR2 Between	laser - retraining	3	4	-0.5735	0.597
orientation	ChR2 Between	laser - retraining	4	5	-1.3395	0.2381
orientation	ChR2 Between	laser - retraining	5	6	1.2967	0.2424
orientation	ChR2 Between	laser - retraining	6	7	0.7385	0.4842
orientation	ChR2 Between	laser - retraining	7	7	-2.6942	0.0309
orientation	ChR2 Between	laser - retraining	8	7	-0.0565	0.9565
orientation	ChR2 Between	laser - retraining	9	6	-1.6733	0.1453
orientation	ChR2 Between	laser - retraining	10	6	1.4533	0.1964
orientation	ChR2 Between	laser - occluded	1	2	-2.301	0.148
orientation	ChR2 Between	laser - occluded	2	2	-0.0629	0.9556
orientation	ChR2 Between	laser - occluded	3	5	-0.5426	0.6107
orientation	ChR2 Between	laser - occluded	4	5	0.338	0.7491
orientation	ChR2 Between	laser - occluded	5	5	1.2449	0.2683
orientation	ChR2 Between	laser - occluded	6	6	0.9912	0.3599
orientation	ChR2 Between	laser - occluded	7	6	1.9013	0.106
orientation	ChR2 Between	laser - occluded	8	6	1.7177	0.1366
orientation	ChR2 Between	laser - occluded	9	7	2.4035	0.0472
orientation	ChR2 Between	laser - occluded	10	6	-0.463	0.6597
orientation	EYFP	laser - retraining	1	1	0.2695	0.8324
orientation	EYFP	laser - retraining	2	2	0.9357	0.4482
orientation	EYFP	laser - retraining	3	4	0.4958	0.6461
orientation	EYFP	laser - retraining	4	4	0.2677	0.8022
orientation	EYFP	laser - retraining	5	5	0.6087	0.5693
orientation	EYFP	laser - retraining	6	5	-0.0208	0.9842
orientation	EYFP	laser - retraining	7	5	1.0406	0.3458
orientation	EYFP	laser - retraining	8	4	-0.4614	0.6685
orientation	EYFP	laser - retraining	9	4	0.3513	0.7431
orientation	EYFP	laser - retraining	10	2	5.787	0.0286
orientation	EYFP	laser - occluded	1	2	-1.574	0.2561
orientation	EYFP	laser - occluded	2	2	0.0798	0.9436
orientation	EYFP	laser - occluded	3	4	-0.9083	0.4151
orientation	EYFP	laser - occluded	4	4	0.4312	0.6885
orientation	EYFP	laser - occluded	5	5	0.2064	0.8446
orientation	EYFP	laser - occluded	6	4	-0.0413	0.9691
orientation	EYFP	laser - occluded	7	5	-1.2779	0.2574
orientation	EYFP	laser - occluded	8	5	0.1163	0.9119
orientation	EYFP	laser - occluded	9	5	0.8443	0.437
orientation	EYFP	laser - occluded	10	4	0.4657	0.6656
