# Supplementary material for: Precisely timed dopamine signals establish distinct kinematic representations of skilled movements
Source: eLife. 2020 Nov 27;9:e61591. doi: 10.7554/eLife.61591 (PMC7861618; doi:10.7554/eLife.61591)
Supplement: Figure 6—source data 3. — A .xlsx file containing the statistical output of Wilcoxon ranksum tests for comparisons between ChR2 During and EYFP group averages in Figures 6D, F, H and J. [file elife-61591-fig6-data3.xlsx]

## Sheet: Sheet1
analysis	session	bin_number	z-value	p-value
final-z	R10	1	0.0800641	0.937229
final-z	R10	2	0.0800641	0.937229
final-z	R10	3	0.0800641	0.937229
final-z	R10	4	0.240192	0.818182
final-z	R10	5	0.240192	0.818182
final-z	R10	6	-0.0800641	0.937229
final-z	R10	7	0	1
final-z	R10	8	-0.0800641	0.937229
final-z	R10	9	-0.240192	0.818182
final-z	R10	10	-0.0800641	0.937229
final-z	R10	11	-0.240192	0.818182
final-z	R10	12	0	1
final-z	R10	13	-0.0800641	0.937229
final-z	R10	14	-0.240192	0.818182
final-z	R10	15	-0.0800641	0.937229
final-z	R10	16	0	1
final-z	R10	17	-0.0800641	0.937229
final-z	R10	18	0.0800641	0.937229
final-z	R10	19	0.560449	0.588745
final-z	R10	20	0.560449	0.588745
final-z	R10	21	0.40032	0.699134
final-z	R10	22	0.40032	0.699134
final-z	R10	23	0.40032	0.699134
final-z	R10	24	0.40032	0.699134
final-z	R10	25	0.40032	0.699134
final-z	R10	26	0.560449	0.588745
final-z	R10	27	0.560449	0.588745
final-z	R10	28	0.720577	0.484848
final-z	R10	29	-0.240192	0.818182
final-z	R10	30	-0.240192	0.818182
final-z	L1	1	-0.273861	0.792208
final-z	L1	2	-0.273861	0.792208
final-z	L1	3	-0.273861	0.792208
final-z	L1	4	-0.456435	0.662338
final-z	L1	5	-0.456435	0.662338
final-z	L1	6	-0.63901	0.536797
final-z	L1	7	-0.456435	0.662338
final-z	L1	8	-0.273861	0.792208
final-z	L1	9	-0.0912871	0.930736
final-z	L1	10	-0.0912871	0.930736
final-z	L1	11	-0.0912871	0.930736
final-z	L1	12	-0.456435	0.662338
final-z	L1	13	-0.63901	0.536797
final-z	L1	14	-0.456435	0.662338
final-z	L1	15	-1.36931	0.177489
final-z	L1	16	-1.36931	0.177489
final-z	L1	17	-1.36931	0.177489
final-z	L1	18	-1.55188	0.125541
final-z	L1	19	-1.55188	0.125541
final-z	L1	20	-1.55188	0.125541
final-z	L1	21	-1.55188	0.125541
final-z	L1	22	-1.55188	0.125541
final-z	L1	23	-1.55188	0.125541
final-z	L1	24	-1.73445	0.0822511
final-z	L1	25	-1.00416	0.329004
final-z	L1	26	-1.36931	0.177489
final-z	L1	27	-0.821584	0.428571
final-z	L1	28	-1.36931	0.177489
final-z	L1	29	-1.18673	0.246753
final-z	L1	30	-1.18673	0.246753
final-z	L2	1	-2.64733	0.004329
final-z	L2	2	-2.64733	0.004329
final-z	L2	3	-2.46475	0.00865801
final-z	L2	4	-2.28218	0.017316
final-z	L2	5	-1.73445	0.0822511
final-z	L2	6	-1.73445	0.0822511
final-z	L2	7	-1.73445	0.0822511
final-z	L2	8	-1.73445	0.0822511
final-z	L2	9	-1.73445	0.0822511
final-z	L2	10	-1.73445	0.0822511
final-z	L2	11	-1.73445	0.0822511
final-z	L2	12	-1.73445	0.0822511
final-z	L2	13	-1.55188	0.125541
final-z	L2	14	-1.55188	0.125541
final-z	L2	15	-2.0996	0.030303
final-z	L2	16	-1.73445	0.0822511
final-z	L2	17	-1.91703	0.0519481
final-z	L2	18	-1.00416	0.329004
final-z	L2	19	-1.36931	0.177489
final-z	L2	20	-1.36931	0.177489
final-z	L2	21	-1.00416	0.329004
final-z	L2	22	-1.36931	0.177489
final-z	L2	23	-1.36931	0.177489
final-z	L2	24	-1.55188	0.125541
final-z	L2	25	-1.55188	0.125541
final-z	L2	26	-1.55188	0.125541
final-z	L2	27	-1.55188	0.125541
final-z	L2	28	-1.91703	0.0519481
final-z	L2	29	-1.91703	0.0519481
final-z	L2	30	-1.73445	0.0822511
final-z	L3	1	-2.32186	0.0151515
final-z	L3	2	-2.32186	0.0151515
final-z	L3	3	-2.32186	0.0151515
final-z	L3	4	-2.48199	0.00865801
final-z	L3	5	-2.48199	0.00865801
final-z	L3	6	-2.48199	0.00865801
final-z	L3	7	-2.48199	0.00865801
final-z	L3	8	-2.48199	0.00865801
final-z	L3	9	-2.48199	0.00865801
final-z	L3	10	-2.48199	0.00865801
final-z	L3	11	-2.48199	0.00865801
final-z	L3	12	-2.48199	0.00865801
final-z	L3	13	-2.48199	0.00865801
final-z	L3	14	-2.64211	0.004329
final-z	L3	15	-2.64211	0.004329
final-z	L3	16	-2.48199	0.00865801
final-z	L3	17	-2.32186	0.0151515
final-z	L3	18	-2.48199	0.00865801
final-z	L3	19	-2.64211	0.004329
final-z	L3	20	-2.48199	0.00865801
final-z	L3	21	-2.48199	0.00865801
final-z	L3	22	-2.48199	0.00865801
final-z	L3	23	-2.48199	0.00865801
final-z	L3	24	-2.48199	0.00865801
final-z	L3	25	-2.32186	0.0151515
final-z	L3	26	-2.16173	0.025974
final-z	L3	27	-2.32186	0.0151515
final-z	L3	28	-2.32186	0.0151515
final-z	L3	29	-2.32186	0.0151515
final-z	L3	30	-2.16173	0.025974
final-z	L4	1	-2.48199	0.00865801
final-z	L4	2	-2.48199	0.00865801
final-z	L4	3	-2.48199	0.00865801
final-z	L4	4	-2.48199	0.00865801
final-z	L4	5	-2.32186	0.0151515
final-z	L4	6	-2.32186	0.0151515
final-z	L4	7	-2.0016	0.0411255
final-z	L4	8	-2.16173	0.025974
final-z	L4	9	-2.0016	0.0411255
final-z	L4	10	-1.84147	0.0649351
final-z	L4	11	-2.0016	0.0411255
final-z	L4	12	-2.0016	0.0411255
final-z	L4	13	-2.0016	0.0411255
final-z	L4	14	-1.84147	0.0649351
final-z	L4	15	-1.84147	0.0649351
final-z	L4	16	-1.84147	0.0649351
final-z	L4	17	-2.0016	0.0411255
final-z	L4	18	-2.0016	0.0411255
final-z	L4	19	-1.84147	0.0649351
final-z	L4	20	-1.84147	0.0649351
final-z	L4	21	-1.84147	0.0649351
final-z	L4	22	-2.0016	0.0411255
final-z	L4	23	-2.0016	0.0411255
final-z	L4	24	-2.0016	0.0411255
final-z	L4	25	-2.0016	0.0411255
final-z	L4	26	-1.84147	0.0649351
final-z	L4	27	-1.84147	0.0649351
final-z	L4	28	-1.84147	0.0649351
final-z	L4	29	-1.84147	0.0649351
final-z	L4	30	-1.84147	0.0649351
final-z	L5	1	-2.32186	0.0151515
final-z	L5	2	-2.64211	0.004329
final-z	L5	3	-2.48199	0.00865801
final-z	L5	4	-2.48199	0.00865801
final-z	L5	5	-2.48199	0.00865801
final-z	L5	6	-2.48199	0.00865801
final-z	L5	7	-2.48199	0.00865801
final-z	L5	8	-2.32186	0.0151515
final-z	L5	9	-2.48199	0.00865801
final-z	L5	10	-2.80224	0.0021645
final-z	L5	11	-2.80224	0.0021645
final-z	L5	12	-2.80224	0.0021645
final-z	L5	13	-2.80224	0.0021645
final-z	L5	14	-2.80224	0.0021645
final-z	L5	15	-2.80224	0.0021645
final-z	L5	16	-2.64211	0.004329
final-z	L5	17	-2.80224	0.0021645
final-z	L5	18	-2.80224	0.0021645
final-z	L5	19	-2.80224	0.0021645
final-z	L5	20	-2.64211	0.004329
final-z	L5	21	-2.80224	0.0021645
final-z	L5	22	-2.80224	0.0021645
final-z	L5	23	-2.64211	0.004329
final-z	L5	24	-2.80224	0.0021645
final-z	L5	25	-2.80224	0.0021645
final-z	L5	26	-2.80224	0.0021645
final-z	L5	27	-2.80224	0.0021645
final-z	L5	28	-2.80224	0.0021645
final-z	L5	29	-2.80224	0.0021645
final-z	L5	30	-2.64211	0.004329
final-z	L6	1	-2.32186	0.0151515
final-z	L6	2	-2.32186	0.0151515
final-z	L6	3	-2.32186	0.0151515
final-z	L6	4	-2.32186	0.0151515
final-z	L6	5	-2.32186	0.0151515
final-z	L6	6	-2.32186	0.0151515
final-z	L6	7	-2.32186	0.0151515
final-z	L6	8	-2.32186	0.0151515
final-z	L6	9	-2.16173	0.025974
final-z	L6	10	-2.16173	0.025974
final-z	L6	11	-2.16173	0.025974
final-z	L6	12	-2.16173	0.025974
final-z	L6	13	-2.32186	0.0151515
final-z	L6	14	-2.16173	0.025974
final-z	L6	15	-2.0016	0.0411255
final-z	L6	16	-2.0016	0.0411255
final-z	L6	17	-2.0016	0.0411255
final-z	L6	18	-2.0016	0.0411255
final-z	L6	19	-2.0016	0.0411255
final-z	L6	20	-2.0016	0.0411255
final-z	L6	21	-2.0016	0.0411255
final-z	L6	22	-2.0016	0.0411255
final-z	L6	23	-2.0016	0.0411255
final-z	L6	24	-2.16173	0.025974
final-z	L6	25	-2.16173	0.025974
final-z	L6	26	-2.16173	0.025974
final-z	L6	27	-2.48199	0.00865801
final-z	L6	28	-2.0016	0.0411255
final-z	L6	29	-2.0016	0.0411255
final-z	L6	30	-2.0016	0.0411255
final-z	O1	1	-2.64211	0.004329
final-z	O1	2	-2.48199	0.00865801
final-z	O1	3	-2.16173	0.025974
final-z	O1	4	-2.0016	0.0411255
final-z	O1	5	-2.0016	0.0411255
final-z	O1	6	-2.0016	0.0411255
final-z	O1	7	-2.0016	0.0411255
final-z	O1	8	-2.0016	0.0411255
final-z	O1	9	-2.0016	0.0411255
final-z	O1	10	-1.68135	0.0930736
final-z	O1	11	-1.68135	0.0930736
final-z	O1	12	-1.84147	0.0649351
final-z	O1	13	-1.52122	0.132035
final-z	O1	14	-1.04083	0.309524
final-z	O1	15	-1.04083	0.309524
final-z	O1	16	-0.880705	0.393939
final-z	O1	17	-1.20096	0.24026
final-z	O1	18	-0.880705	0.393939
final-z	O1	19	-0.880705	0.393939
final-z	O1	20	-0.880705	0.393939
final-z	O1	21	-0.880705	0.393939
final-z	O1	22	-0.880705	0.393939
final-z	O1	23	-0.720577	0.484848
final-z	O1	24	-0.720577	0.484848
final-z	O1	25	-0.880705	0.393939
final-z	O1	26	-0.560449	0.588745
final-z	O1	27	-0.0800641	0.937229
final-z	O1	28	0.240192	0.818182
final-z	O1	29	0.40032	0.699134
final-z	O1	30	0.240192	0.818182
final-z	O2	1	-1.00416	0.329004
final-z	O2	2	-0.63901	0.536797
final-z	O2	3	-0.456435	0.662338
final-z	O2	4	-0.456435	0.662338
final-z	O2	5	-0.456435	0.662338
final-z	O2	6	-0.456435	0.662338
final-z	O2	7	-0.0912871	0.930736
final-z	O2	8	-0.273861	0.792208
final-z	O2	9	-0.63901	0.536797
final-z	O2	10	-0.821584	0.428571
final-z	O2	11	-0.63901	0.536797
final-z	O2	12	-0.821584	0.428571
final-z	O2	13	-1.00416	0.329004
final-z	O2	14	-1.00416	0.329004
final-z	O2	15	-0.821584	0.428571
final-z	O2	16	-1.00416	0.329004
final-z	O2	17	-0.821584	0.428571
final-z	O2	18	-0.821584	0.428571
final-z	O2	19	-1.00416	0.329004
final-z	O2	20	-0.821584	0.428571
final-z	O2	21	-1.00416	0.329004
final-z	O2	22	-0.821584	0.428571
final-z	O2	23	-0.821584	0.428571
final-z	O2	24	-0.456435	0.662338
final-z	O2	25	-0.456435	0.662338
final-z	O2	26	-0.63901	0.536797
final-z	O2	27	-0.821584	0.428571
final-z	O2	28	-0.63901	0.536797
final-z	O2	29	-0.273861	0.792208
final-z	O2	30	-0.456435	0.662338
final-z	O3	1	-1.18673	0.246753
final-z	O3	2	-1.18673	0.246753
final-z	O3	3	-1.18673	0.246753
final-z	O3	4	-0.821584	0.428571
final-z	O3	5	-0.821584	0.428571
final-z	O3	6	-0.63901	0.536797
final-z	O3	7	-0.63901	0.536797
final-z	O3	8	-0.273861	0.792208
final-z	O3	9	-0.273861	0.792208
final-z	O3	10	-0.273861	0.792208
final-z	O3	11	-0.273861	0.792208
final-z	O3	12	-0.273861	0.792208
final-z	O3	13	-0.0912871	0.930736
final-z	O3	14	-0.0912871	0.930736
final-z	O3	15	0.0912871	0.930736
final-z	O3	16	-0.273861	0.792208
final-z	O3	17	-0.0912871	0.930736
final-z	O3	18	-0.0912871	0.930736
final-z	O3	19	-0.456435	0.662338
final-z	O3	20	-0.456435	0.662338
final-z	O3	21	-0.456435	0.662338
final-z	O3	22	-0.273861	0.792208
final-z	O3	23	-0.456435	0.662338
final-z	O3	24	-0.456435	0.662338
final-z	O3	25	-0.273861	0.792208
final-z	O3	26	-0.273861	0.792208
final-z	O3	27	-0.0912871	0.930736
final-z	O3	28	0	1
final-z	O3	29	0.273861	0.792208
final-z	O3	30	0.456435	0.662338
final-z	O4	1	-1.84147	0.0649351
final-z	O4	2	-0.40032	0.699134
final-z	O4	3	-0.40032	0.699134
final-z	O4	4	-0.240192	0.818182
final-z	O4	5	-0.40032	0.699134
final-z	O4	6	-0.240192	0.818182
final-z	O4	7	-0.240192	0.818182
final-z	O4	8	-0.40032	0.699134
final-z	O4	9	-0.560449	0.588745
final-z	O4	10	-0.40032	0.699134
final-z	O4	11	-0.40032	0.699134
final-z	O4	12	-0.720577	0.484848
final-z	O4	13	-0.40032	0.699134
final-z	O4	14	-0.560449	0.588745
final-z	O4	15	-0.560449	0.588745
final-z	O4	16	0	1
final-z	O4	17	0.40032	0.699134
final-z	O4	18	0.40032	0.699134
final-z	O4	19	0.560449	0.588745
final-z	O4	20	0.560449	0.588745
final-z	O4	21	0.40032	0.699134
final-z	O4	22	0.40032	0.699134
final-z	O4	23	0.40032	0.699134
final-z	O4	24	0.560449	0.588745
final-z	O4	25	0.40032	0.699134
final-z	O4	26	0.0800641	0.937229
final-z	O4	27	0	1
final-z	O4	28	0	1
final-z	O4	29	-0.240192	0.818182
final-z	O4	30	-0.40032	0.699134
final-z	O5	1	0.0912871	0.930736
final-z	O5	2	0.821584	0.428571
final-z	O5	3	0.273861	0.792208
final-z	O5	4	0.63901	0.536797
final-z	O5	5	0.63901	0.536797
final-z	O5	6	0.63901	0.536797
final-z	O5	7	0.821584	0.428571
final-z	O5	8	0.63901	0.536797
final-z	O5	9	0.63901	0.536797
final-z	O5	10	0.821584	0.428571
final-z	O5	11	0.63901	0.536797
final-z	O5	12	0.63901	0.536797
final-z	O5	13	0.456435	0.662338
final-z	O5	14	0.273861	0.792208
final-z	O5	15	0.273861	0.792208
final-z	O5	16	0.273861	0.792208
final-z	O5	17	0.273861	0.792208
final-z	O5	18	0.273861	0.792208
final-z	O5	19	0.273861	0.792208
final-z	O5	20	0.273861	0.792208
final-z	O5	21	0.273861	0.792208
final-z	O5	22	0.456435	0.662338
final-z	O5	23	0.63901	0.536797
final-z	O5	24	0.63901	0.536797
final-z	O5	25	0.63901	0.536797
final-z	O5	26	0.63901	0.536797
final-z	O5	27	0.63901	0.536797
final-z	O5	28	0.63901	0.536797
final-z	O5	29	0.63901	0.536797
final-z	O5	30	0.821584	0.428571
aperture	R10	1	1.20096	0.24026
aperture	R10	2	1.36109	0.179654
aperture	R10	3	1.36109	0.179654
aperture	R10	4	1.68135	0.0930736
aperture	R10	5	1.68135	0.0930736
aperture	R10	6	1.52122	0.132035
aperture	R10	7	1.36109	0.179654
aperture	R10	8	1.36109	0.179654
aperture	R10	9	1.36109	0.179654
aperture	R10	10	1.04083	0.309524
aperture	R10	11	0.720577	0.484848
aperture	R10	12	0.720577	0.484848
aperture	R10	13	0.880705	0.393939
aperture	R10	14	0.560449	0.588745
aperture	R10	15	0.560449	0.588745
aperture	R10	16	0.560449	0.588745
aperture	R10	17	0.720577	0.484848
aperture	R10	18	0.720577	0.484848
aperture	R10	19	0.720577	0.484848
aperture	R10	20	0.720577	0.484848
aperture	R10	21	0.560449	0.588745
aperture	R10	22	0.720577	0.484848
aperture	R10	23	0.880705	0.393939
aperture	R10	24	0.880705	0.393939
aperture	R10	25	1.04083	0.309524
aperture	R10	26	1.04083	0.309524
aperture	R10	27	1.04083	0.309524
aperture	R10	28	0.880705	0.393939
aperture	R10	29	0.560449	0.588745
aperture	R10	30	0.240192	0.818182
aperture	L1	1	1.00416	0.329004
aperture	L1	2	1.18673	0.246753
aperture	L1	3	1.18673	0.246753
aperture	L1	4	1.00416	0.329004
aperture	L1	5	1.00416	0.329004
aperture	L1	6	1.00416	0.329004
aperture	L1	7	1.00416	0.329004
aperture	L1	8	1.00416	0.329004
aperture	L1	9	0.821584	0.428571
aperture	L1	10	0.456435	0.662338
aperture	L1	11	0.273861	0.792208
aperture	L1	12	0.273861	0.792208
aperture	L1	13	0.0912871	0.930736
aperture	L1	14	0	1
aperture	L1	15	-0.0912871	0.930736
aperture	L1	16	-0.0912871	0.930736
aperture	L1	17	-0.273861	0.792208
aperture	L1	18	-0.0912871	0.930736
aperture	L1	19	-0.0912871	0.930736
aperture	L1	20	-0.273861	0.792208
aperture	L1	21	-0.456435	0.662338
aperture	L1	22	-0.273861	0.792208
aperture	L1	23	-0.456435	0.662338
aperture	L1	24	-0.0912871	0.930736
aperture	L1	25	0.0912871	0.930736
aperture	L1	26	0.0912871	0.930736
aperture	L1	27	0.273861	0.792208
aperture	L1	28	0.273861	0.792208
aperture	L1	29	0.273861	0.792208
aperture	L1	30	0.273861	0.792208
aperture	L2	1	0.0912871	0.930736
aperture	L2	2	0.0912871	0.930736
aperture	L2	3	0.0912871	0.930736
aperture	L2	4	0.0912871	0.930736
aperture	L2	5	0	1
aperture	L2	6	0	1
aperture	L2	7	0.0912871	0.930736
aperture	L2	8	0.0912871	0.930736
aperture	L2	9	0	1
aperture	L2	10	0.273861	0.792208
aperture	L2	11	0.0912871	0.930736
aperture	L2	12	0.273861	0.792208
aperture	L2	13	0.273861	0.792208
aperture	L2	14	0.0912871	0.930736
aperture	L2	15	0.0912871	0.930736
aperture	L2	16	-0.0912871	0.930736
aperture	L2	17	-0.0912871	0.930736
aperture	L2	18	0	1
aperture	L2	19	-0.0912871	0.930736
aperture	L2	20	0	1
aperture	L2	21	0	1
aperture	L2	22	0	1
aperture	L2	23	0	1
aperture	L2	24	0	1
aperture	L2	25	0	1
aperture	L2	26	0.0912871	0.930736
aperture	L2	27	0.273861	0.792208
aperture	L2	28	0.0912871	0.930736
aperture	L2	29	0.0912871	0.930736
aperture	L2	30	0.0912871	0.930736
aperture	L3	1	0	1
aperture	L3	2	0	1
aperture	L3	3	0.240192	0.818182
aperture	L3	4	0.240192	0.818182
aperture	L3	5	0.40032	0.699134
aperture	L3	6	0.40032	0.699134
aperture	L3	7	0.560449	0.588745
aperture	L3	8	0.560449	0.588745
aperture	L3	9	0.560449	0.588745
aperture	L3	10	0.560449	0.588745
aperture	L3	11	0.560449	0.588745
aperture	L3	12	0.560449	0.588745
aperture	L3	13	0.240192	0.818182
aperture	L3	14	0	1
aperture	L3	15	0.0800641	0.937229
aperture	L3	16	0.0800641	0.937229
aperture	L3	17	0.0800641	0.937229
aperture	L3	18	0	1
aperture	L3	19	0.0800641	0.937229
aperture	L3	20	0.0800641	0.937229
aperture	L3	21	0.240192	0.818182
aperture	L3	22	0.0800641	0.937229
aperture	L3	23	0.0800641	0.937229
aperture	L3	24	0.240192	0.818182
aperture	L3	25	0.560449	0.588745
aperture	L3	26	0.560449	0.588745
aperture	L3	27	0.880705	0.393939
aperture	L3	28	0.720577	0.484848
aperture	L3	29	0.720577	0.484848
aperture	L3	30	0.40032	0.699134
aperture	L4	1	-0.0800641	0.937229
aperture	L4	2	-0.0800641	0.937229
aperture	L4	3	-0.0800641	0.937229
aperture	L4	4	-0.0800641	0.937229
aperture	L4	5	-0.0800641	0.937229
aperture	L4	6	-0.0800641	0.937229
aperture	L4	7	-0.240192	0.818182
aperture	L4	8	-0.40032	0.699134
aperture	L4	9	-0.40032	0.699134
aperture	L4	10	-0.240192	0.818182
aperture	L4	11	-0.40032	0.699134
aperture	L4	12	-0.40032	0.699134
aperture	L4	13	-0.240192	0.818182
aperture	L4	14	-0.240192	0.818182
aperture	L4	15	-0.240192	0.818182
aperture	L4	16	-0.240192	0.818182
aperture	L4	17	-0.0800641	0.937229
aperture	L4	18	-0.240192	0.818182
aperture	L4	19	-0.0800641	0.937229
aperture	L4	20	-0.0800641	0.937229
aperture	L4	21	0	1
aperture	L4	22	0.0800641	0.937229
aperture	L4	23	0.240192	0.818182
aperture	L4	24	0.0800641	0.937229
aperture	L4	25	0.240192	0.818182
aperture	L4	26	0.0800641	0.937229
aperture	L4	27	0.40032	0.699134
aperture	L4	28	0.40032	0.699134
aperture	L4	29	0.40032	0.699134
aperture	L4	30	0.40032	0.699134
aperture	L5	1	-0.880705	0.393939
aperture	L5	2	-0.720577	0.484848
aperture	L5	3	-0.880705	0.393939
aperture	L5	4	-0.880705	0.393939
aperture	L5	5	-1.20096	0.24026
aperture	L5	6	-1.04083	0.309524
aperture	L5	7	-0.880705	0.393939
aperture	L5	8	-1.04083	0.309524
aperture	L5	9	-1.20096	0.24026
aperture	L5	10	-0.720577	0.484848
aperture	L5	11	-0.720577	0.484848
aperture	L5	12	-0.720577	0.484848
aperture	L5	13	-0.720577	0.484848
aperture	L5	14	-1.04083	0.309524
aperture	L5	15	-0.880705	0.393939
aperture	L5	16	-0.720577	0.484848
aperture	L5	17	-0.720577	0.484848
aperture	L5	18	-0.720577	0.484848
aperture	L5	19	-0.880705	0.393939
aperture	L5	20	-0.880705	0.393939
aperture	L5	21	-1.04083	0.309524
aperture	L5	22	-0.880705	0.393939
aperture	L5	23	-0.560449	0.588745
aperture	L5	24	-0.40032	0.699134
aperture	L5	25	-0.40032	0.699134
aperture	L5	26	-0.720577	0.484848
aperture	L5	27	-0.240192	0.818182
aperture	L5	28	-0.240192	0.818182
aperture	L5	29	-0.0800641	0.937229
aperture	L5	30	-0.240192	0.818182
aperture	L6	1	-0.40032	0.699134
aperture	L6	2	-0.0800641	0.937229
aperture	L6	3	-0.0800641	0.937229
aperture	L6	4	-0.0800641	0.937229
aperture	L6	5	-0.240192	0.818182
aperture	L6	6	-0.0800641	0.937229
aperture	L6	7	-0.240192	0.818182
aperture	L6	8	0	1
aperture	L6	9	-0.0800641	0.937229
aperture	L6	10	-0.240192	0.818182
aperture	L6	11	-0.0800641	0.937229
aperture	L6	12	-0.40032	0.699134
aperture	L6	13	-0.40032	0.699134
aperture	L6	14	0	1
aperture	L6	15	0	1
aperture	L6	16	0.240192	0.818182
aperture	L6	17	0.0800641	0.937229
aperture	L6	18	0	1
aperture	L6	19	0	1
aperture	L6	20	0.0800641	0.937229
aperture	L6	21	0	1
aperture	L6	22	0	1
aperture	L6	23	0	1
aperture	L6	24	0	1
aperture	L6	25	0	1
aperture	L6	26	0.0800641	0.937229
aperture	L6	27	0.40032	0.699134
aperture	L6	28	0.40032	0.699134
aperture	L6	29	0.560449	0.588745
aperture	L6	30	0.40032	0.699134
aperture	O1	1	0.720577	0.484848
aperture	O1	2	0.560449	0.588745
aperture	O1	3	0.40032	0.699134
aperture	O1	4	0.880705	0.393939
aperture	O1	5	0.880705	0.393939
aperture	O1	6	0.880705	0.393939
aperture	O1	7	0.880705	0.393939
aperture	O1	8	1.04083	0.309524
aperture	O1	9	0.880705	0.393939
aperture	O1	10	1.20096	0.24026
aperture	O1	11	1.20096	0.24026
aperture	O1	12	1.20096	0.24026
aperture	O1	13	1.36109	0.179654
aperture	O1	14	1.36109	0.179654
aperture	O1	15	0.880705	0.393939
aperture	O1	16	0.720577	0.484848
aperture	O1	17	0.560449	0.588745
aperture	O1	18	0.880705	0.393939
aperture	O1	19	0.880705	0.393939
aperture	O1	20	0.880705	0.393939
aperture	O1	21	0.720577	0.484848
aperture	O1	22	0.880705	0.393939
aperture	O1	23	0.720577	0.484848
aperture	O1	24	0.720577	0.484848
aperture	O1	25	0.880705	0.393939
aperture	O1	26	0.880705	0.393939
aperture	O1	27	1.04083	0.309524
aperture	O1	28	0.880705	0.393939
aperture	O1	29	0.880705	0.393939
aperture	O1	30	0.880705	0.393939
aperture	O2	1	1.00416	0.329004
aperture	O2	2	1.00416	0.329004
aperture	O2	3	1.00416	0.329004
aperture	O2	4	1.00416	0.329004
aperture	O2	5	1.00416	0.329004
aperture	O2	6	1.00416	0.329004
aperture	O2	7	1.00416	0.329004
aperture	O2	8	1.00416	0.329004
aperture	O2	9	1.00416	0.329004
aperture	O2	10	1.00416	0.329004
aperture	O2	11	1.00416	0.329004
aperture	O2	12	1.00416	0.329004
aperture	O2	13	1.00416	0.329004
aperture	O2	14	1.00416	0.329004
aperture	O2	15	1.00416	0.329004
aperture	O2	16	1.00416	0.329004
aperture	O2	17	1.00416	0.329004
aperture	O2	18	1.00416	0.329004
aperture	O2	19	1.00416	0.329004
aperture	O2	20	1.00416	0.329004
aperture	O2	21	1.00416	0.329004
aperture	O2	22	1.00416	0.329004
aperture	O2	23	1.00416	0.329004
aperture	O2	24	1.18673	0.246753
aperture	O2	25	1.18673	0.246753
aperture	O2	26	1.18673	0.246753
aperture	O2	27	1.18673	0.246753
aperture	O2	28	1.18673	0.246753
aperture	O2	29	1.18673	0.246753
aperture	O2	30	1.18673	0.246753
aperture	O3	1	1.00416	0.329004
aperture	O3	2	0.821584	0.428571
aperture	O3	3	0.821584	0.428571
aperture	O3	4	1.00416	0.329004
aperture	O3	5	1.00416	0.329004
aperture	O3	6	1.00416	0.329004
aperture	O3	7	1.00416	0.329004
aperture	O3	8	1.00416	0.329004
aperture	O3	9	1.18673	0.246753
aperture	O3	10	1.18673	0.246753
aperture	O3	11	1.36931	0.177489
aperture	O3	12	1.55188	0.125541
aperture	O3	13	1.55188	0.125541
aperture	O3	14	1.55188	0.125541
aperture	O3	15	1.36931	0.177489
aperture	O3	16	1.36931	0.177489
aperture	O3	17	1.36931	0.177489
aperture	O3	18	1.73445	0.0822511
aperture	O3	19	1.55188	0.125541
aperture	O3	20	1.55188	0.125541
aperture	O3	21	1.36931	0.177489
aperture	O3	22	1.18673	0.246753
aperture	O3	23	1.36931	0.177489
aperture	O3	24	1.36931	0.177489
aperture	O3	25	1.36931	0.177489
aperture	O3	26	1.55188	0.125541
aperture	O3	27	1.55188	0.125541
aperture	O3	28	1.18673	0.246753
aperture	O3	29	1.18673	0.246753
aperture	O3	30	1.55188	0.125541
aperture	O4	1	0.720577	0.484848
aperture	O4	2	1.20096	0.24026
aperture	O4	3	1.20096	0.24026
aperture	O4	4	1.20096	0.24026
aperture	O4	5	1.20096	0.24026
aperture	O4	6	1.20096	0.24026
aperture	O4	7	1.20096	0.24026
aperture	O4	8	1.20096	0.24026
aperture	O4	9	1.20096	0.24026
aperture	O4	10	1.20096	0.24026
aperture	O4	11	1.20096	0.24026
aperture	O4	12	1.36109	0.179654
aperture	O4	13	1.52122	0.132035
aperture	O4	14	1.52122	0.132035
aperture	O4	15	1.52122	0.132035
aperture	O4	16	1.52122	0.132035
aperture	O4	17	1.68135	0.0930736
aperture	O4	18	1.68135	0.0930736
aperture	O4	19	1.52122	0.132035
aperture	O4	20	1.36109	0.179654
aperture	O4	21	1.52122	0.132035
aperture	O4	22	1.04083	0.309524
aperture	O4	23	1.20096	0.24026
aperture	O4	24	1.36109	0.179654
aperture	O4	25	1.36109	0.179654
aperture	O4	26	1.36109	0.179654
aperture	O4	27	1.36109	0.179654
aperture	O4	28	1.20096	0.24026
aperture	O4	29	1.20096	0.24026
aperture	O4	30	1.04083	0.309524
aperture	O5	1	0.821584	0.428571
aperture	O5	2	0.821584	0.428571
aperture	O5	3	1.00416	0.329004
aperture	O5	4	1.18673	0.246753
aperture	O5	5	1.18673	0.246753
aperture	O5	6	1.00416	0.329004
aperture	O5	7	1.18673	0.246753
aperture	O5	8	1.00416	0.329004
aperture	O5	9	1.00416	0.329004
aperture	O5	10	1.00416	0.329004
aperture	O5	11	1.00416	0.329004
aperture	O5	12	1.00416	0.329004
aperture	O5	13	0.821584	0.428571
aperture	O5	14	0.63901	0.536797
aperture	O5	15	0.63901	0.536797
aperture	O5	16	0.63901	0.536797
aperture	O5	17	0.63901	0.536797
aperture	O5	18	0.63901	0.536797
aperture	O5	19	0.63901	0.536797
aperture	O5	20	0.273861	0.792208
aperture	O5	21	0.456435	0.662338
aperture	O5	22	0.821584	0.428571
aperture	O5	23	0.821584	0.428571
aperture	O5	24	1.00416	0.329004
aperture	O5	25	1.18673	0.246753
aperture	O5	26	1.00416	0.329004
aperture	O5	27	1.00416	0.329004
aperture	O5	28	1.00416	0.329004
aperture	O5	29	1.00416	0.329004
aperture	O5	30	1.00416	0.329004
orientation	R10	1	0.40032	0.699134
orientation	R10	2	0.40032	0.699134
orientation	R10	3	0.40032	0.699134
orientation	R10	4	0.40032	0.699134
orientation	R10	5	0.40032	0.699134
orientation	R10	6	0.40032	0.699134
orientation	R10	7	0.40032	0.699134
orientation	R10	8	0.40032	0.699134
orientation	R10	9	0.40032	0.699134
orientation	R10	10	0.40032	0.699134
orientation	R10	11	0.40032	0.699134
orientation	R10	12	0.40032	0.699134
orientation	R10	13	0.40032	0.699134
orientation	R10	14	0.40032	0.699134
orientation	R10	15	0.40032	0.699134
orientation	R10	16	0.40032	0.699134
orientation	R10	17	0.40032	0.699134
orientation	R10	18	0.40032	0.699134
orientation	R10	19	0.40032	0.699134
orientation	R10	20	0.40032	0.699134
orientation	R10	21	0.40032	0.699134
orientation	R10	22	0.40032	0.699134
orientation	R10	23	0.40032	0.699134
orientation	R10	24	0.40032	0.699134
orientation	R10	25	0.40032	0.699134
orientation	R10	26	0.40032	0.699134
orientation	R10	27	0.40032	0.699134
orientation	R10	28	0.40032	0.699134
orientation	R10	29	0.40032	0.699134
orientation	R10	30	0.40032	0.699134
orientation	L1	1	0	1
orientation	L1	2	0	1
orientation	L1	3	0	1
orientation	L1	4	0	1
orientation	L1	5	-0.0912871	0.930736
orientation	L1	6	-0.0912871	0.930736
orientation	L1	7	-0.0912871	0.930736
orientation	L1	8	-0.0912871	0.930736
orientation	L1	9	-0.0912871	0.930736
orientation	L1	10	-0.0912871	0.930736
orientation	L1	11	0	1
orientation	L1	12	0	1
orientation	L1	13	-0.0912871	0.930736
orientation	L1	14	-0.0912871	0.930736
orientation	L1	15	0	1
orientation	L1	16	0	1
orientation	L1	17	-0.0912871	0.930736
orientation	L1	18	-0.0912871	0.930736
orientation	L1	19	-0.0912871	0.930736
orientation	L1	20	0	1
orientation	L1	21	-0.0912871	0.930736
orientation	L1	22	0	1
orientation	L1	23	0	1
orientation	L1	24	0	1
orientation	L1	25	-0.0912871	0.930736
orientation	L1	26	-0.0912871	0.930736
orientation	L1	27	-0.273861	0.792208
orientation	L1	28	-0.0912871	0.930736
orientation	L1	29	-0.0912871	0.930736
orientation	L1	30	-0.0912871	0.930736
orientation	L2	1	-1.00416	0.329004
orientation	L2	2	-1.00416	0.329004
orientation	L2	3	-0.63901	0.536797
orientation	L2	4	-0.63901	0.536797
orientation	L2	5	-0.63901	0.536797
orientation	L2	6	-0.273861	0.792208
orientation	L2	7	-0.0912871	0.930736
orientation	L2	8	-0.0912871	0.930736
orientation	L2	9	-0.0912871	0.930736
orientation	L2	10	-0.0912871	0.930736
orientation	L2	11	-0.0912871	0.930736
orientation	L2	12	-0.0912871	0.930736
orientation	L2	13	-0.0912871	0.930736
orientation	L2	14	-0.0912871	0.930736
orientation	L2	15	-0.0912871	0.930736
orientation	L2	16	-0.0912871	0.930736
orientation	L2	17	-0.0912871	0.930736
orientation	L2	18	-0.0912871	0.930736
orientation	L2	19	-0.273861	0.792208
orientation	L2	20	-0.821584	0.428571
orientation	L2	21	-0.821584	0.428571
orientation	L2	22	-0.63901	0.536797
orientation	L2	23	-0.821584	0.428571
orientation	L2	24	-0.456435	0.662338
orientation	L2	25	-0.273861	0.792208
orientation	L2	26	-0.273861	0.792208
orientation	L2	27	-0.273861	0.792208
orientation	L2	28	-0.273861	0.792208
orientation	L2	29	-0.273861	0.792208
orientation	L2	30	-0.273861	0.792208
orientation	L3	1	-0.240192	0.818182
orientation	L3	2	-0.240192	0.818182
orientation	L3	3	-0.240192	0.818182
orientation	L3	4	-0.240192	0.818182
orientation	L3	5	-0.40032	0.699134
orientation	L3	6	-0.240192	0.818182
orientation	L3	7	-0.240192	0.818182
orientation	L3	8	-0.40032	0.699134
orientation	L3	9	-0.40032	0.699134
orientation	L3	10	-0.40032	0.699134
orientation	L3	11	-0.40032	0.699134
orientation	L3	12	-0.40032	0.699134
orientation	L3	13	-0.40032	0.699134
orientation	L3	14	-0.40032	0.699134
orientation	L3	15	-0.560449	0.588745
orientation	L3	16	-0.560449	0.588745
orientation	L3	17	-0.560449	0.588745
orientation	L3	18	-0.40032	0.699134
orientation	L3	19	-0.560449	0.588745
orientation	L3	20	-0.560449	0.588745
orientation	L3	21	-0.560449	0.588745
orientation	L3	22	-0.560449	0.588745
orientation	L3	23	-0.720577	0.484848
orientation	L3	24	-0.720577	0.484848
orientation	L3	25	-0.560449	0.588745
orientation	L3	26	-0.560449	0.588745
orientation	L3	27	-0.560449	0.588745
orientation	L3	28	-0.560449	0.588745
orientation	L3	29	-0.560449	0.588745
orientation	L3	30	-0.560449	0.588745
orientation	L4	1	-0.880705	0.393939
orientation	L4	2	-0.720577	0.484848
orientation	L4	3	-0.880705	0.393939
orientation	L4	4	-0.880705	0.393939
orientation	L4	5	-1.04083	0.309524
orientation	L4	6	-0.880705	0.393939
orientation	L4	7	-0.880705	0.393939
orientation	L4	8	-0.880705	0.393939
orientation	L4	9	-1.04083	0.309524
orientation	L4	10	-0.880705	0.393939
orientation	L4	11	-0.880705	0.393939
orientation	L4	12	-1.04083	0.309524
orientation	L4	13	-1.04083	0.309524
orientation	L4	14	-1.04083	0.309524
orientation	L4	15	-1.04083	0.309524
orientation	L4	16	-0.880705	0.393939
orientation	L4	17	-0.880705	0.393939
orientation	L4	18	-1.04083	0.309524
orientation	L4	19	-0.880705	0.393939
orientation	L4	20	-0.880705	0.393939
orientation	L4	21	-1.04083	0.309524
orientation	L4	22	-1.04083	0.309524
orientation	L4	23	-0.880705	0.393939
orientation	L4	24	-0.720577	0.484848
orientation	L4	25	-0.880705	0.393939
orientation	L4	26	-0.880705	0.393939
orientation	L4	27	-0.720577	0.484848
orientation	L4	28	-1.20096	0.24026
orientation	L4	29	-1.04083	0.309524
orientation	L4	30	-1.04083	0.309524
orientation	L5	1	-1.20096	0.24026
orientation	L5	2	-0.880705	0.393939
orientation	L5	3	-0.720577	0.484848
orientation	L5	4	-0.880705	0.393939
orientation	L5	5	-0.880705	0.393939
orientation	L5	6	-0.880705	0.393939
orientation	L5	7	-0.880705	0.393939
orientation	L5	8	-0.880705	0.393939
orientation	L5	9	-0.720577	0.484848
orientation	L5	10	-0.560449	0.588745
orientation	L5	11	-0.560449	0.588745
orientation	L5	12	-0.560449	0.588745
orientation	L5	13	-0.560449	0.588745
orientation	L5	14	-0.880705	0.393939
orientation	L5	15	-0.880705	0.393939
orientation	L5	16	-1.04083	0.309524
orientation	L5	17	-1.04083	0.309524
orientation	L5	18	-0.880705	0.393939
orientation	L5	19	-1.20096	0.24026
orientation	L5	20	-1.04083	0.309524
orientation	L5	21	-0.880705	0.393939
orientation	L5	22	-0.720577	0.484848
orientation	L5	23	-0.720577	0.484848
orientation	L5	24	-0.720577	0.484848
orientation	L5	25	-0.720577	0.484848
orientation	L5	26	-0.560449	0.588745
orientation	L5	27	-0.560449	0.588745
orientation	L5	28	-0.40032	0.699134
orientation	L5	29	-0.240192	0.818182
orientation	L5	30	-0.240192	0.818182
orientation	L6	1	-0.560449	0.588745
orientation	L6	2	-0.560449	0.588745
orientation	L6	3	-0.560449	0.588745
orientation	L6	4	-0.560449	0.588745
orientation	L6	5	-0.560449	0.588745
orientation	L6	6	-0.720577	0.484848
orientation	L6	7	-0.40032	0.699134
orientation	L6	8	-0.40032	0.699134
orientation	L6	9	-0.40032	0.699134
orientation	L6	10	-0.560449	0.588745
orientation	L6	11	-0.0800641	0.937229
orientation	L6	12	-0.240192	0.818182
orientation	L6	13	-0.40032	0.699134
orientation	L6	14	-0.40032	0.699134
orientation	L6	15	0	1
orientation	L6	16	-0.560449	0.588745
orientation	L6	17	-0.40032	0.699134
orientation	L6	18	-0.720577	0.484848
orientation	L6	19	-0.40032	0.699134
orientation	L6	20	-0.40032	0.699134
orientation	L6	21	-0.0800641	0.937229
orientation	L6	22	-0.240192	0.818182
orientation	L6	23	-0.240192	0.818182
orientation	L6	24	-0.0800641	0.937229
orientation	L6	25	-0.240192	0.818182
orientation	L6	26	-0.560449	0.588745
orientation	L6	27	-0.240192	0.818182
orientation	L6	28	-0.240192	0.818182
orientation	L6	29	-0.240192	0.818182
orientation	L6	30	-0.240192	0.818182
orientation	O1	1	0.240192	0.818182
orientation	O1	2	0.240192	0.818182
orientation	O1	3	0.240192	0.818182
orientation	O1	4	0.240192	0.818182
orientation	O1	5	0.240192	0.818182
orientation	O1	6	0.240192	0.818182
orientation	O1	7	0.240192	0.818182
orientation	O1	8	0.240192	0.818182
orientation	O1	9	0.240192	0.818182
orientation	O1	10	0.40032	0.699134
orientation	O1	11	0.40032	0.699134
orientation	O1	12	0.40032	0.699134
orientation	O1	13	0.40032	0.699134
orientation	O1	14	0.40032	0.699134
orientation	O1	15	0.560449	0.588745
orientation	O1	16	0.40032	0.699134
orientation	O1	17	0.40032	0.699134
orientation	O1	18	0.560449	0.588745
orientation	O1	19	0.40032	0.699134
orientation	O1	20	0.40032	0.699134
orientation	O1	21	0.40032	0.699134
orientation	O1	22	0.40032	0.699134
orientation	O1	23	0.40032	0.699134
orientation	O1	24	0.240192	0.818182
orientation	O1	25	0.240192	0.818182
orientation	O1	26	0.40032	0.699134
orientation	O1	27	0.40032	0.699134
orientation	O1	28	0.40032	0.699134
orientation	O1	29	0.40032	0.699134
orientation	O1	30	0.40032	0.699134
orientation	O2	1	0.456435	0.662338
orientation	O2	2	0.456435	0.662338
orientation	O2	3	0.63901	0.536797
orientation	O2	4	0.63901	0.536797
orientation	O2	5	0.456435	0.662338
orientation	O2	6	0.456435	0.662338
orientation	O2	7	0.63901	0.536797
orientation	O2	8	0.63901	0.536797
orientation	O2	9	0.63901	0.536797
orientation	O2	10	0.63901	0.536797
orientation	O2	11	0.63901	0.536797
orientation	O2	12	0.63901	0.536797
orientation	O2	13	0.63901	0.536797
orientation	O2	14	0.63901	0.536797
orientation	O2	15	0.821584	0.428571
orientation	O2	16	0.821584	0.428571
orientation	O2	17	0.821584	0.428571
orientation	O2	18	0.821584	0.428571
orientation	O2	19	0.63901	0.536797
orientation	O2	20	0.63901	0.536797
orientation	O2	21	0.63901	0.536797
orientation	O2	22	0.63901	0.536797
orientation	O2	23	0.63901	0.536797
orientation	O2	24	0.456435	0.662338
orientation	O2	25	0.456435	0.662338
orientation	O2	26	0.456435	0.662338
orientation	O2	27	0.456435	0.662338
orientation	O2	28	0.63901	0.536797
orientation	O2	29	0.63901	0.536797
orientation	O2	30	0.63901	0.536797
orientation	O3	1	0.821584	0.428571
orientation	O3	2	1.00416	0.329004
orientation	O3	3	1.00416	0.329004
orientation	O3	4	0.821584	0.428571
orientation	O3	5	0.821584	0.428571
orientation	O3	6	1.00416	0.329004
orientation	O3	7	0.821584	0.428571
orientation	O3	8	0.821584	0.428571
orientation	O3	9	0.821584	0.428571
orientation	O3	10	0.821584	0.428571
orientation	O3	11	0.821584	0.428571
orientation	O3	12	0.821584	0.428571
orientation	O3	13	0.821584	0.428571
orientation	O3	14	0.821584	0.428571
orientation	O3	15	0.821584	0.428571
orientation	O3	16	0.821584	0.428571
orientation	O3	17	0.821584	0.428571
orientation	O3	18	1.00416	0.329004
orientation	O3	19	1.00416	0.329004
orientation	O3	20	1.00416	0.329004
orientation	O3	21	1.18673	0.246753
orientation	O3	22	1.18673	0.246753
orientation	O3	23	1.18673	0.246753
orientation	O3	24	1.00416	0.329004
orientation	O3	25	1.00416	0.329004
orientation	O3	26	1.00416	0.329004
orientation	O3	27	1.00416	0.329004
orientation	O3	28	1.00416	0.329004
orientation	O3	29	1.00416	0.329004
orientation	O3	30	1.18673	0.246753
orientation	O4	1	0.0800641	0.937229
orientation	O4	2	0.0800641	0.937229
orientation	O4	3	0.0800641	0.937229
orientation	O4	4	0.0800641	0.937229
orientation	O4	5	0.240192	0.818182
orientation	O4	6	0.240192	0.818182
orientation	O4	7	0.240192	0.818182
orientation	O4	8	0.240192	0.818182
orientation	O4	9	0.240192	0.818182
orientation	O4	10	0.240192	0.818182
orientation	O4	11	0.240192	0.818182
orientation	O4	12	0.240192	0.818182
orientation	O4	13	0.240192	0.818182
orientation	O4	14	0.240192	0.818182
orientation	O4	15	0.240192	0.818182
orientation	O4	16	0.0800641	0.937229
orientation	O4	17	0.0800641	0.937229
orientation	O4	18	0.0800641	0.937229
orientation	O4	19	0	1
orientation	O4	20	0	1
orientation	O4	21	0.240192	0.818182
orientation	O4	22	-0.0800641	0.937229
orientation	O4	23	-0.0800641	0.937229
orientation	O4	24	-0.0800641	0.937229
orientation	O4	25	-0.0800641	0.937229
orientation	O4	26	-0.0800641	0.937229
orientation	O4	27	-0.0800641	0.937229
orientation	O4	28	-0.0800641	0.937229
orientation	O4	29	-0.0800641	0.937229
orientation	O4	30	-0.0800641	0.937229
orientation	O5	1	0.63901	0.536797
orientation	O5	2	0.63901	0.536797
orientation	O5	3	0.63901	0.536797
orientation	O5	4	0.456435	0.662338
orientation	O5	5	0.456435	0.662338
orientation	O5	6	0.456435	0.662338
orientation	O5	7	0.456435	0.662338
orientation	O5	8	0.456435	0.662338
orientation	O5	9	0.456435	0.662338
orientation	O5	10	0.456435	0.662338
orientation	O5	11	0.273861	0.792208
orientation	O5	12	0.273861	0.792208
orientation	O5	13	0.273861	0.792208
orientation	O5	14	0.456435	0.662338
orientation	O5	15	0.273861	0.792208
orientation	O5	16	0.273861	0.792208
orientation	O5	17	0.273861	0.792208
orientation	O5	18	0.456435	0.662338
orientation	O5	19	0.273861	0.792208
orientation	O5	20	0.273861	0.792208
orientation	O5	21	0.273861	0.792208
orientation	O5	22	0.273861	0.792208
orientation	O5	23	0.456435	0.662338
orientation	O5	24	0.273861	0.792208
orientation	O5	25	0.273861	0.792208
orientation	O5	26	0.273861	0.792208
orientation	O5	27	0.273861	0.792208
orientation	O5	28	0.0912871	0.930736
orientation	O5	29	0.0912871	0.930736
orientation	O5	30	0.0912871	0.930736
velocity	R10	1	0.240192	0.818182
velocity	R10	2	0.560449	0.588745
velocity	R10	3	0.40032	0.699134
velocity	R10	4	0.40032	0.699134
velocity	R10	5	0.240192	0.818182
velocity	R10	6	0.560449	0.588745
velocity	R10	7	0.240192	0.818182
velocity	R10	8	0.240192	0.818182
velocity	R10	9	0.40032	0.699134
velocity	R10	10	-0.0800641	0.937229
velocity	R10	11	-0.560449	0.588745
velocity	R10	12	-0.40032	0.699134
velocity	R10	13	-0.560449	0.588745
velocity	R10	14	-0.240192	0.818182
velocity	R10	15	-0.0800641	0.937229
velocity	R10	16	-0.0800641	0.937229
velocity	R10	17	0	1
velocity	R10	18	-0.240192	0.818182
velocity	R10	19	-0.40032	0.699134
velocity	R10	20	0.240192	0.818182
velocity	R10	21	0.240192	0.818182
velocity	R10	22	0.0800641	0.937229
velocity	R10	23	0	1
velocity	R10	24	0	1
velocity	R10	25	0	1
velocity	R10	26	-0.0800641	0.937229
velocity	R10	27	-0.240192	0.818182
velocity	R10	28	-0.240192	0.818182
velocity	R10	29	0	1
velocity	R10	30	-0.0800641	0.937229
velocity	L1	1	0.63901	0.536797
velocity	L1	2	0.63901	0.536797
velocity	L1	3	0.63901	0.536797
velocity	L1	4	0.456435	0.662338
velocity	L1	5	0.273861	0.792208
velocity	L1	6	0.273861	0.792208
velocity	L1	7	0.0912871	0.930736
velocity	L1	8	0	1
velocity	L1	9	0	1
velocity	L1	10	0	1
velocity	L1	11	-0.273861	0.792208
velocity	L1	12	-0.273861	0.792208
velocity	L1	13	-0.456435	0.662338
velocity	L1	14	-0.0912871	0.930736
velocity	L1	15	0	1
velocity	L1	16	0.0912871	0.930736
velocity	L1	17	-0.0912871	0.930736
velocity	L1	18	-0.0912871	0.930736
velocity	L1	19	-0.0912871	0.930736
velocity	L1	20	-0.0912871	0.930736
velocity	L1	21	0	1
velocity	L1	22	0.0912871	0.930736
velocity	L1	23	0.0912871	0.930736
velocity	L1	24	-0.0912871	0.930736
velocity	L1	25	-0.456435	0.662338
velocity	L1	26	-0.456435	0.662338
velocity	L1	27	-0.0912871	0.930736
velocity	L1	28	-0.0912871	0.930736
velocity	L1	29	-0.0912871	0.930736
velocity	L1	30	0.273861	0.792208
velocity	L2	1	-1.36931	0.177489
velocity	L2	2	-1.73445	0.0822511
velocity	L2	3	-1.55188	0.125541
velocity	L2	4	-1.55188	0.125541
velocity	L2	5	-1.55188	0.125541
velocity	L2	6	-1.55188	0.125541
velocity	L2	7	-1.36931	0.177489
velocity	L2	8	-1.18673	0.246753
velocity	L2	9	-1.36931	0.177489
velocity	L2	10	-1.55188	0.125541
velocity	L2	11	-1.18673	0.246753
velocity	L2	12	-1.00416	0.329004
velocity	L2	13	-0.63901	0.536797
velocity	L2	14	-0.63901	0.536797
velocity	L2	15	-0.456435	0.662338
velocity	L2	16	-0.456435	0.662338
velocity	L2	17	-0.456435	0.662338
velocity	L2	18	-0.63901	0.536797
velocity	L2	19	-0.821584	0.428571
velocity	L2	20	-0.63901	0.536797
velocity	L2	21	-0.821584	0.428571
velocity	L2	22	-0.456435	0.662338
velocity	L2	23	-0.456435	0.662338
velocity	L2	24	-0.273861	0.792208
velocity	L2	25	-0.273861	0.792208
velocity	L2	26	-0.456435	0.662338
velocity	L2	27	-0.0912871	0.930736
velocity	L2	28	-0.0912871	0.930736
velocity	L2	29	0	1
velocity	L2	30	0.0912871	0.930736
velocity	L3	1	-1.68135	0.0930736
velocity	L3	2	-1.84147	0.0649351
velocity	L3	3	-1.84147	0.0649351
velocity	L3	4	-1.84147	0.0649351
velocity	L3	5	-1.68135	0.0930736
velocity	L3	6	-1.52122	0.132035
velocity	L3	7	-1.36109	0.179654
velocity	L3	8	-1.36109	0.179654
velocity	L3	9	-1.20096	0.24026
velocity	L3	10	-1.20096	0.24026
velocity	L3	11	-1.20096	0.24026
velocity	L3	12	-1.36109	0.179654
velocity	L3	13	-0.880705	0.393939
velocity	L3	14	-1.20096	0.24026
velocity	L3	15	-1.36109	0.179654
velocity	L3	16	-1.36109	0.179654
velocity	L3	17	-1.36109	0.179654
velocity	L3	18	-1.52122	0.132035
velocity	L3	19	-1.68135	0.0930736
velocity	L3	20	-1.20096	0.24026
velocity	L3	21	-1.20096	0.24026
velocity	L3	22	-1.20096	0.24026
velocity	L3	23	-1.36109	0.179654
velocity	L3	24	-1.20096	0.24026
velocity	L3	25	-0.880705	0.393939
velocity	L3	26	-0.560449	0.588745
velocity	L3	27	-0.720577	0.484848
velocity	L3	28	-0.40032	0.699134
velocity	L3	29	-0.40032	0.699134
velocity	L3	30	-0.560449	0.588745
velocity	L4	1	-1.68135	0.0930736
velocity	L4	2	-1.84147	0.0649351
velocity	L4	3	-2.0016	0.0411255
velocity	L4	4	-1.52122	0.132035
velocity	L4	5	-1.36109	0.179654
velocity	L4	6	-1.52122	0.132035
velocity	L4	7	-1.20096	0.24026
velocity	L4	8	-1.36109	0.179654
velocity	L4	9	-1.20096	0.24026
velocity	L4	10	-1.36109	0.179654
velocity	L4	11	-1.36109	0.179654
velocity	L4	12	-1.68135	0.0930736
velocity	L4	13	-1.20096	0.24026
velocity	L4	14	-1.36109	0.179654
velocity	L4	15	-1.36109	0.179654
velocity	L4	16	-1.52122	0.132035
velocity	L4	17	-1.04083	0.309524
velocity	L4	18	-1.68135	0.0930736
velocity	L4	19	-1.68135	0.0930736
velocity	L4	20	-0.880705	0.393939
velocity	L4	21	-1.04083	0.309524
velocity	L4	22	-0.880705	0.393939
velocity	L4	23	-1.04083	0.309524
velocity	L4	24	-0.880705	0.393939
velocity	L4	25	-1.04083	0.309524
velocity	L4	26	-0.880705	0.393939
velocity	L4	27	-0.880705	0.393939
velocity	L4	28	-1.36109	0.179654
velocity	L4	29	-1.52122	0.132035
velocity	L4	30	-1.84147	0.0649351
velocity	L5	1	-1.20096	0.24026
velocity	L5	2	-1.52122	0.132035
velocity	L5	3	-1.68135	0.0930736
velocity	L5	4	-1.52122	0.132035
velocity	L5	5	-1.52122	0.132035
velocity	L5	6	-1.68135	0.0930736
velocity	L5	7	-1.68135	0.0930736
velocity	L5	8	-1.84147	0.0649351
velocity	L5	9	-1.84147	0.0649351
velocity	L5	10	-1.68135	0.0930736
velocity	L5	11	-1.36109	0.179654
velocity	L5	12	-1.52122	0.132035
velocity	L5	13	-1.36109	0.179654
velocity	L5	14	-2.0016	0.0411255
velocity	L5	15	-1.68135	0.0930736
velocity	L5	16	-1.68135	0.0930736
velocity	L5	17	-2.0016	0.0411255
velocity	L5	18	-1.84147	0.0649351
velocity	L5	19	-1.52122	0.132035
velocity	L5	20	-1.84147	0.0649351
velocity	L5	21	-1.84147	0.0649351
velocity	L5	22	-1.84147	0.0649351
velocity	L5	23	-1.84147	0.0649351
velocity	L5	24	-2.0016	0.0411255
velocity	L5	25	-1.84147	0.0649351
velocity	L5	26	-1.84147	0.0649351
velocity	L5	27	-2.0016	0.0411255
velocity	L5	28	-2.0016	0.0411255
velocity	L5	29	-2.0016	0.0411255
velocity	L5	30	-2.0016	0.0411255
velocity	L6	1	-1.68135	0.0930736
velocity	L6	2	-1.52122	0.132035
velocity	L6	3	-1.68135	0.0930736
velocity	L6	4	-1.68135	0.0930736
velocity	L6	5	-1.68135	0.0930736
velocity	L6	6	-1.68135	0.0930736
velocity	L6	7	-1.84147	0.0649351
velocity	L6	8	-1.68135	0.0930736
velocity	L6	9	-1.52122	0.132035
velocity	L6	10	-1.52122	0.132035
velocity	L6	11	-1.68135	0.0930736
velocity	L6	12	-1.68135	0.0930736
velocity	L6	13	-1.68135	0.0930736
velocity	L6	14	-1.52122	0.132035
velocity	L6	15	-1.52122	0.132035
velocity	L6	16	-1.52122	0.132035
velocity	L6	17	-1.52122	0.132035
velocity	L6	18	-1.52122	0.132035
velocity	L6	19	-1.52122	0.132035
velocity	L6	20	-1.68135	0.0930736
velocity	L6	21	-1.52122	0.132035
velocity	L6	22	-1.36109	0.179654
velocity	L6	23	-1.52122	0.132035
velocity	L6	24	-1.68135	0.0930736
velocity	L6	25	-1.20096	0.24026
velocity	L6	26	-1.36109	0.179654
velocity	L6	27	-1.36109	0.179654
velocity	L6	28	-1.20096	0.24026
velocity	L6	29	-1.04083	0.309524
velocity	L6	30	-0.880705	0.393939
velocity	O1	1	-0.880705	0.393939
velocity	O1	2	-0.880705	0.393939
velocity	O1	3	-1.20096	0.24026
velocity	O1	4	-1.36109	0.179654
velocity	O1	5	-1.68135	0.0930736
velocity	O1	6	-1.52122	0.132035
velocity	O1	7	-1.52122	0.132035
velocity	O1	8	-1.20096	0.24026
velocity	O1	9	-1.04083	0.309524
velocity	O1	10	-0.560449	0.588745
velocity	O1	11	-0.560449	0.588745
velocity	O1	12	-0.880705	0.393939
velocity	O1	13	-0.40032	0.699134
velocity	O1	14	-0.240192	0.818182
velocity	O1	15	-0.0800641	0.937229
velocity	O1	16	-0.0800641	0.937229
velocity	O1	17	-0.40032	0.699134
velocity	O1	18	-0.40032	0.699134
velocity	O1	19	-0.40032	0.699134
velocity	O1	20	-0.40032	0.699134
velocity	O1	21	-0.40032	0.699134
velocity	O1	22	-0.240192	0.818182
velocity	O1	23	-0.40032	0.699134
velocity	O1	24	-0.560449	0.588745
velocity	O1	25	-0.560449	0.588745
velocity	O1	26	-0.880705	0.393939
velocity	O1	27	-0.40032	0.699134
velocity	O1	28	-0.0800641	0.937229
velocity	O1	29	0	1
velocity	O1	30	0	1
velocity	O2	1	-0.0912871	0.930736
velocity	O2	2	-0.273861	0.792208
velocity	O2	3	-0.273861	0.792208
velocity	O2	4	-0.456435	0.662338
velocity	O2	5	-0.63901	0.536797
velocity	O2	6	-0.63901	0.536797
velocity	O2	7	-0.63901	0.536797
velocity	O2	8	-0.63901	0.536797
velocity	O2	9	-0.63901	0.536797
velocity	O2	10	-0.63901	0.536797
velocity	O2	11	-0.821584	0.428571
velocity	O2	12	-0.63901	0.536797
velocity	O2	13	-0.821584	0.428571
velocity	O2	14	-0.63901	0.536797
velocity	O2	15	-0.821584	0.428571
velocity	O2	16	-0.821584	0.428571
velocity	O2	17	-0.63901	0.536797
velocity	O2	18	-0.63901	0.536797
velocity	O2	19	-0.821584	0.428571
velocity	O2	20	-0.821584	0.428571
velocity	O2	21	-0.821584	0.428571
velocity	O2	22	-0.821584	0.428571
velocity	O2	23	-0.456435	0.662338
velocity	O2	24	-1.00416	0.329004
velocity	O2	25	-0.273861	0.792208
velocity	O2	26	-0.821584	0.428571
velocity	O2	27	-0.821584	0.428571
velocity	O2	28	-0.63901	0.536797
velocity	O2	29	-0.63901	0.536797
velocity	O2	30	-0.63901	0.536797
velocity	O3	1	0.0912871	0.930736
velocity	O3	2	0	1
velocity	O3	3	0	1
velocity	O3	4	0.273861	0.792208
velocity	O3	5	0.273861	0.792208
velocity	O3	6	0.456435	0.662338
velocity	O3	7	0.456435	0.662338
velocity	O3	8	0.456435	0.662338
velocity	O3	9	0.456435	0.662338
velocity	O3	10	0.456435	0.662338
velocity	O3	11	0.456435	0.662338
velocity	O3	12	0.273861	0.792208
velocity	O3	13	0.456435	0.662338
velocity	O3	14	0.821584	0.428571
velocity	O3	15	0.821584	0.428571
velocity	O3	16	1.00416	0.329004
velocity	O3	17	0.63901	0.536797
velocity	O3	18	0.456435	0.662338
velocity	O3	19	0.63901	0.536797
velocity	O3	20	0.63901	0.536797
velocity	O3	21	0.63901	0.536797
velocity	O3	22	0.456435	0.662338
velocity	O3	23	0.273861	0.792208
velocity	O3	24	0.273861	0.792208
velocity	O3	25	0.0912871	0.930736
velocity	O3	26	0.273861	0.792208
velocity	O3	27	0.273861	0.792208
velocity	O3	28	0.456435	0.662338
velocity	O3	29	0.273861	0.792208
velocity	O3	30	0.273861	0.792208
velocity	O4	1	-0.560449	0.588745
velocity	O4	2	-0.240192	0.818182
velocity	O4	3	-0.240192	0.818182
velocity	O4	4	-0.240192	0.818182
velocity	O4	5	-0.240192	0.818182
velocity	O4	6	-0.0800641	0.937229
velocity	O4	7	-0.0800641	0.937229
velocity	O4	8	-0.0800641	0.937229
velocity	O4	9	0	1
velocity	O4	10	0.0800641	0.937229
velocity	O4	11	0.0800641	0.937229
velocity	O4	12	0.0800641	0.937229
velocity	O4	13	0.0800641	0.937229
velocity	O4	14	0.240192	0.818182
velocity	O4	15	0.240192	0.818182
velocity	O4	16	0.240192	0.818182
velocity	O4	17	0.240192	0.818182
velocity	O4	18	-0.0800641	0.937229
velocity	O4	19	-0.40032	0.699134
velocity	O4	20	-0.40032	0.699134
velocity	O4	21	-0.720577	0.484848
velocity	O4	22	-0.720577	0.484848
velocity	O4	23	-0.880705	0.393939
velocity	O4	24	-1.04083	0.309524
velocity	O4	25	-1.04083	0.309524
velocity	O4	26	-1.04083	0.309524
velocity	O4	27	-0.880705	0.393939
velocity	O4	28	-0.880705	0.393939
velocity	O4	29	-0.720577	0.484848
velocity	O4	30	-0.40032	0.699134
velocity	O5	1	-0.273861	0.792208
velocity	O5	2	-0.273861	0.792208
velocity	O5	3	-0.273861	0.792208
velocity	O5	4	-0.273861	0.792208
velocity	O5	5	-0.456435	0.662338
velocity	O5	6	-0.63901	0.536797
velocity	O5	7	-0.273861	0.792208
velocity	O5	8	-0.456435	0.662338
velocity	O5	9	-0.456435	0.662338
velocity	O5	10	-0.456435	0.662338
velocity	O5	11	-0.456435	0.662338
velocity	O5	12	-0.456435	0.662338
velocity	O5	13	-0.456435	0.662338
velocity	O5	14	-0.456435	0.662338
velocity	O5	15	-0.456435	0.662338
velocity	O5	16	-0.821584	0.428571
velocity	O5	17	-0.821584	0.428571
velocity	O5	18	-0.63901	0.536797
velocity	O5	19	-0.456435	0.662338
velocity	O5	20	-0.273861	0.792208
velocity	O5	21	-0.456435	0.662338
velocity	O5	22	-0.63901	0.536797
velocity	O5	23	-0.456435	0.662338
velocity	O5	24	-0.273861	0.792208
velocity	O5	25	-0.273861	0.792208
velocity	O5	26	-0.0912871	0.930736
velocity	O5	27	-0.0912871	0.930736
velocity	O5	28	-0.273861	0.792208
velocity	O5	29	0	1
velocity	O5	30	-0.0912871	0.930736
