# Supplementary material for: Precisely timed dopamine signals establish distinct kinematic representations of skilled movements
Source: eLife. 2020 Nov 27;9:e61591. doi: 10.7554/eLife.61591 (PMC7861618; doi:10.7554/eLife.61591)
Supplement: Figure 7—figure supplement 2—source data 3. — A .xlsx file containing the statistical output of Wilcoxon ranksum tests for comparisons between Arch During and Arch Between group averages in Figure 7—figure supplement 2 panels A, C, E, and G. [file elife-61591-fig7-figsupp2-data3.xlsx]

## Sheet: Sheet1
analysis	session	bin_number	z-value	p-value
final-z	R10	1	-0.746203	0.47619
final-z	R10	2	0.240613	0.777056
final-z	R10	3	0.240613	0.777056
final-z	R10	4	0.401022	0.660173
final-z	R10	5	0.401022	0.660173
final-z	R10	6	0.561431	0.554113
final-z	R10	7	0.882249	0.37013
final-z	R10	8	0.882249	0.37013
final-z	R10	9	0.72184	0.454545
final-z	R10	10	0.72184	0.454545
final-z	R10	11	0.72184	0.454545
final-z	R10	12	0.72184	0.454545
final-z	R10	13	0.72184	0.454545
final-z	R10	14	0.72184	0.454545
final-z	R10	15	0.72184	0.454545
final-z	R10	16	0.72184	0.454545
final-z	R10	17	1.20307	0.225108
final-z	R10	18	1.20307	0.225108
final-z	R10	19	1.20307	0.225108
final-z	R10	20	1.20307	0.225108
final-z	R10	21	1.20307	0.225108
final-z	R10	22	1.20307	0.225108
final-z	R10	23	1.20307	0.225108
final-z	R10	24	1.36348	0.168831
final-z	R10	25	1.36348	0.168831
final-z	R10	26	1.52388	0.125541
final-z	R10	27	1.20307	0.225108
final-z	R10	28	0.72184	0.45671
final-z	R10	29	0.882249	0.367965
final-z	R10	30	0.561431	0.556277
final-z	L1	1	1.20307	0.225108
final-z	L1	2	1.20307	0.225108
final-z	L1	3	1.20307	0.225108
final-z	L1	4	1.20307	0.225108
final-z	L1	5	1.20307	0.225108
final-z	L1	6	1.20307	0.225108
final-z	L1	7	1.20307	0.225108
final-z	L1	8	1.20307	0.225108
final-z	L1	9	1.04266	0.290043
final-z	L1	10	0.72184	0.454545
final-z	L1	11	0.882249	0.37013
final-z	L1	12	0.882249	0.37013
final-z	L1	13	0.882249	0.37013
final-z	L1	14	0.882249	0.37013
final-z	L1	15	0.882249	0.37013
final-z	L1	16	0.882249	0.37013
final-z	L1	17	0.882249	0.37013
final-z	L1	18	0.561431	0.556277
final-z	L1	19	0.882249	0.367965
final-z	L1	20	1.20307	0.225108
final-z	L1	21	1.20307	0.225108
final-z	L1	22	1.04266	0.290043
final-z	L1	23	0.882249	0.37013
final-z	L1	24	0.882249	0.37013
final-z	L1	25	0.882249	0.37013
final-z	L1	26	0.882249	0.37013
final-z	L1	27	0.882249	0.37013
final-z	L1	28	0.882249	0.37013
final-z	L1	29	0.72184	0.454545
final-z	L1	30	0.882249	0.37013
final-z	L2	1	1.04266	0.290043
final-z	L2	2	1.04266	0.290043
final-z	L2	3	1.04266	0.290043
final-z	L2	4	0.882249	0.37013
final-z	L2	5	0.882249	0.37013
final-z	L2	6	0.882249	0.37013
final-z	L2	7	1.04266	0.290043
final-z	L2	8	1.04266	0.290043
final-z	L2	9	1.04266	0.290043
final-z	L2	10	1.04266	0.290043
final-z	L2	11	1.04266	0.290043
final-z	L2	12	1.20307	0.225108
final-z	L2	13	1.04266	0.290043
final-z	L2	14	1.04266	0.290043
final-z	L2	15	1.04266	0.290043
final-z	L2	16	1.20307	0.225108
final-z	L2	17	1.20307	0.225108
final-z	L2	18	1.20307	0.225108
final-z	L2	19	1.20307	0.225108
final-z	L2	20	1.20307	0.225108
final-z	L2	21	1.20307	0.225108
final-z	L2	22	1.20307	0.225108
final-z	L2	23	1.20307	0.225108
final-z	L2	24	1.20307	0.225108
final-z	L2	25	1.20307	0.225108
final-z	L2	26	1.20307	0.225108
final-z	L2	27	1.20307	0.225108
final-z	L2	28	0.882249	0.37013
final-z	L2	29	1.04266	0.290043
final-z	L2	30	1.04266	0.290043
final-z	L3	1	1.8447	0.0627706
final-z	L3	2	1.8447	0.0627706
final-z	L3	3	1.8447	0.0627706
final-z	L3	4	1.68429	0.0887446
final-z	L3	5	1.68429	0.0887446
final-z	L3	6	1.68429	0.0887446
final-z	L3	7	1.68429	0.0887446
final-z	L3	8	1.68429	0.0887446
final-z	L3	9	1.68429	0.0887446
final-z	L3	10	1.68429	0.0887446
final-z	L3	11	1.68429	0.0887446
final-z	L3	12	1.36348	0.166667
final-z	L3	13	1.68429	0.0887446
final-z	L3	14	1.68429	0.0887446
final-z	L3	15	1.68429	0.0887446
final-z	L3	16	1.68429	0.0887446
final-z	L3	17	1.68429	0.0887446
final-z	L3	18	1.68429	0.0887446
final-z	L3	19	1.8447	0.0627706
final-z	L3	20	1.8447	0.0627706
final-z	L3	21	1.8447	0.0627706
final-z	L3	22	1.8447	0.0627706
final-z	L3	23	1.8447	0.0627706
final-z	L3	24	1.8447	0.0627706
final-z	L3	25	1.8447	0.0627706
final-z	L3	26	2.00511	0.038961
final-z	L3	27	2.00511	0.038961
final-z	L3	28	2.00511	0.038961
final-z	L3	29	2.00511	0.038961
final-z	L3	30	2.00511	0.038961
final-z	L4	1	1.52388	0.125541
final-z	L4	2	1.52388	0.125541
final-z	L4	3	1.52388	0.125541
final-z	L4	4	1.52388	0.125541
final-z	L4	5	1.68429	0.0887446
final-z	L4	6	1.68429	0.0887446
final-z	L4	7	1.8447	0.0627706
final-z	L4	8	1.8447	0.0627706
final-z	L4	9	1.8447	0.0627706
final-z	L4	10	1.8447	0.0627706
final-z	L4	11	1.8447	0.0627706
final-z	L4	12	1.68429	0.0887446
final-z	L4	13	1.68429	0.0887446
final-z	L4	14	1.8447	0.0627706
final-z	L4	15	1.68429	0.0887446
final-z	L4	16	1.52388	0.125541
final-z	L4	17	1.52388	0.125541
final-z	L4	18	1.36348	0.168831
final-z	L4	19	1.36348	0.168831
final-z	L4	20	1.20307	0.225108
final-z	L4	21	1.36348	0.168831
final-z	L4	22	1.04266	0.290043
final-z	L4	23	1.04266	0.290043
final-z	L4	24	1.36348	0.168831
final-z	L4	25	1.20307	0.225108
final-z	L4	26	1.36348	0.168831
final-z	L4	27	1.20307	0.225108
final-z	L4	28	1.20307	0.225108
final-z	L4	29	1.20307	0.225108
final-z	L4	30	1.36348	0.168831
final-z	L5	1	1.49967	0.142857
final-z	L5	2	1.49967	0.142857
final-z	L5	3	1.19973	0.25
final-z	L5	4	1.19973	0.25
final-z	L5	5	1.19973	0.25
final-z	L5	6	1.49967	0.142857
final-z	L5	7	1.49967	0.142857
final-z	L5	8	1.49967	0.142857
final-z	L5	9	1.49967	0.142857
final-z	L5	10	1.49967	0.142857
final-z	L5	11	1.49967	0.142857
final-z	L5	12	1.49967	0.142857
final-z	L5	13	1.49967	0.142857
final-z	L5	14	1.49967	0.142857
final-z	L5	15	1.49967	0.142857
final-z	L5	16	1.19973	0.25
final-z	L5	17	1.49967	0.142857
final-z	L5	18	1.19973	0.25
final-z	L5	19	1.49967	0.142857
final-z	L5	20	1.49967	0.142857
final-z	L5	21	1.49967	0.142857
final-z	L5	22	1.49967	0.142857
final-z	L5	23	1.49967	0.142857
final-z	L5	24	1.49967	0.142857
final-z	L5	25	1.49967	0.142857
final-z	L5	26	1.49967	0.142857
final-z	L5	27	1.19973	0.25
final-z	L5	28	1.19973	0.25
final-z	L5	29	1.7996	0.0714286
final-z	L5	30	1.7996	0.0714286
final-z	L6	1	0.962324	0.333333
final-z	L6	2	0.962324	0.333333
final-z	L6	3	0.962324	0.333333
final-z	L6	4	0.962324	0.333333
final-z	L6	5	0.962324	0.333333
final-z	L6	6	1.17617	0.247619
final-z	L6	7	1.17617	0.247619
final-z	L6	8	0.748474	0.447619
final-z	L6	9	0.748474	0.447619
final-z	L6	10	0.748474	0.447619
final-z	L6	11	0.748474	0.447619
final-z	L6	12	0.748474	0.447619
final-z	L6	13	0.748474	0.447619
final-z	L6	14	0.748474	0.447619
final-z	L6	15	0.748474	0.447619
final-z	L6	16	0.748474	0.447619
final-z	L6	17	0.962324	0.333333
final-z	L6	18	0.962324	0.333333
final-z	L6	19	0.962324	0.333333
final-z	L6	20	0.962324	0.333333
final-z	L6	21	0.962324	0.333333
final-z	L6	22	0.962324	0.333333
final-z	L6	23	0.748474	0.447619
final-z	L6	24	0.748474	0.447619
final-z	L6	25	0.748474	0.447619
final-z	L6	26	0.748474	0.447619
final-z	L6	27	0.748474	0.447619
final-z	L6	28	0.748474	0.447619
final-z	L6	29	0.748474	0.447619
final-z	L6	30	0.962324	0.333333
final-z	O1	1	0.534624	0.571429
final-z	O1	2	0.534624	0.571429
final-z	O1	3	0.534624	0.571429
final-z	O1	4	0.320775	0.714286
final-z	O1	5	0.320775	0.714286
final-z	O1	6	0.106925	0.857143
final-z	O1	7	0.106925	0.857143
final-z	O1	8	0.106925	0.857143
final-z	O1	9	0.320775	0.714286
final-z	O1	10	0.320775	0.714286
final-z	O1	11	0.106925	0.857143
final-z	O1	12	0.320775	0.714286
final-z	O1	13	0.106925	0.857143
final-z	O1	14	0	1
final-z	O1	15	0	1
final-z	O1	16	0	1
final-z	O1	17	0.106925	0.857143
final-z	O1	18	0.106925	0.857143
final-z	O1	19	0.106925	0.857143
final-z	O1	20	0.106925	0.857143
final-z	O1	21	0.320775	0.714286
final-z	O1	22	0.320775	0.714286
final-z	O1	23	0.320775	0.714286
final-z	O1	24	0.106925	0.857143
final-z	O1	25	0.106925	0.857143
final-z	O1	26	0.106925	0.857143
final-z	O1	27	0.106925	0.857143
final-z	O1	28	0.106925	0.857143
final-z	O1	29	0.106925	0.857143
final-z	O1	30	-0.320775	0.714286
final-z	O2	1	0.240613	0.781385
final-z	O2	2	0.240613	0.781385
final-z	O2	3	0.401022	0.664502
final-z	O2	4	0.72184	0.454545
final-z	O2	5	0.72184	0.454545
final-z	O2	6	0.240613	0.781385
final-z	O2	7	0.240613	0.781385
final-z	O2	8	0.561431	0.554113
final-z	O2	9	0.240613	0.781385
final-z	O2	10	0.240613	0.781385
final-z	O2	11	0.240613	0.781385
final-z	O2	12	0.0802044	0.900433
final-z	O2	13	0.0802044	0.900433
final-z	O2	14	0.0802044	0.900433
final-z	O2	15	0.0802044	0.900433
final-z	O2	16	0	1
final-z	O2	17	0	1
final-z	O2	18	0	1
final-z	O2	19	0.240613	0.777056
final-z	O2	20	0.561431	0.554113
final-z	O2	21	0.240613	0.777056
final-z	O2	22	0.401022	0.660173
final-z	O2	23	0.401022	0.660173
final-z	O2	24	0.401022	0.660173
final-z	O2	25	0.561431	0.554113
final-z	O2	26	0.561431	0.554113
final-z	O2	27	0.561431	0.554113
final-z	O2	28	0.401022	0.660173
final-z	O2	29	0.401022	0.660173
final-z	O2	30	0.401022	0.660173
final-z	O3	1	0.72184	0.454545
final-z	O3	2	0.882249	0.37013
final-z	O3	3	0.72184	0.454545
final-z	O3	4	0.882249	0.37013
final-z	O3	5	0.882249	0.37013
final-z	O3	6	0.882249	0.37013
final-z	O3	7	0.72184	0.454545
final-z	O3	8	0.72184	0.454545
final-z	O3	9	0.72184	0.454545
final-z	O3	10	0.72184	0.454545
final-z	O3	11	0.72184	0.454545
final-z	O3	12	0.561431	0.554113
final-z	O3	13	0.561431	0.554113
final-z	O3	14	0.561431	0.554113
final-z	O3	15	0.401022	0.660173
final-z	O3	16	0.401022	0.660173
final-z	O3	17	0.401022	0.660173
final-z	O3	18	0.401022	0.660173
final-z	O3	19	0.401022	0.660173
final-z	O3	20	0.401022	0.660173
final-z	O3	21	0.401022	0.660173
final-z	O3	22	0.401022	0.660173
final-z	O3	23	0.401022	0.660173
final-z	O3	24	0.401022	0.660173
final-z	O3	25	0.561431	0.554113
final-z	O3	26	0.561431	0.554113
final-z	O3	27	0.72184	0.454545
final-z	O3	28	0.72184	0.454545
final-z	O3	29	0.561431	0.554113
final-z	O3	30	0.561431	0.554113
final-z	O4	1	0.401022	0.660173
final-z	O4	2	0.561431	0.554113
final-z	O4	3	0.561431	0.554113
final-z	O4	4	0.561431	0.554113
final-z	O4	5	0.401022	0.660173
final-z	O4	6	0.240613	0.777056
final-z	O4	7	0.240613	0.777056
final-z	O4	8	0.240613	0.777056
final-z	O4	9	0.0802044	0.893939
final-z	O4	10	0.0802044	0.893939
final-z	O4	11	0.0802044	0.893939
final-z	O4	12	0.0802044	0.893939
final-z	O4	13	0.0802044	0.893939
final-z	O4	14	0.0802044	0.893939
final-z	O4	15	0.0802044	0.893939
final-z	O4	16	0.240613	0.777056
final-z	O4	17	0.240613	0.777056
final-z	O4	18	0.240613	0.777056
final-z	O4	19	0.240613	0.777056
final-z	O4	20	0.240613	0.777056
final-z	O4	21	0.240613	0.777056
final-z	O4	22	0.240613	0.777056
final-z	O4	23	0.240613	0.777056
final-z	O4	24	0.240613	0.777056
final-z	O4	25	0.240613	0.777056
final-z	O4	26	0.240613	0.777056
final-z	O4	27	0.240613	0.777056
final-z	O4	28	0	1
final-z	O4	29	0	1
final-z	O4	30	0	1
final-z	O5	1	0.72184	0.454545
final-z	O5	2	0.561431	0.554113
final-z	O5	3	0.561431	0.554113
final-z	O5	4	0.72184	0.454545
final-z	O5	5	0.72184	0.454545
final-z	O5	6	0.561431	0.554113
final-z	O5	7	0.561431	0.554113
final-z	O5	8	0.561431	0.554113
final-z	O5	9	0.72184	0.454545
final-z	O5	10	0.72184	0.454545
final-z	O5	11	0.72184	0.454545
final-z	O5	12	0.72184	0.454545
final-z	O5	13	0.72184	0.454545
final-z	O5	14	0.882249	0.37013
final-z	O5	15	0.882249	0.37013
final-z	O5	16	0.882249	0.37013
final-z	O5	17	0.882249	0.37013
final-z	O5	18	1.04266	0.290043
final-z	O5	19	0.882249	0.37013
final-z	O5	20	1.04266	0.290043
final-z	O5	21	1.04266	0.290043
final-z	O5	22	0.882249	0.37013
final-z	O5	23	1.04266	0.290043
final-z	O5	24	1.20307	0.225108
final-z	O5	25	1.20307	0.225108
final-z	O5	26	1.20307	0.225108
final-z	O5	27	1.36348	0.168831
final-z	O5	28	1.36348	0.168831
final-z	O5	29	1.36348	0.168831
final-z	O5	30	1.36348	0.168831
aperture	R10	1	1.04266	0.290043
aperture	R10	2	0.882249	0.37013
aperture	R10	3	1.36348	0.168831
aperture	R10	4	1.52388	0.125541
aperture	R10	5	1.36348	0.168831
aperture	R10	6	1.36348	0.168831
aperture	R10	7	1.36348	0.168831
aperture	R10	8	1.52388	0.125541
aperture	R10	9	1.36348	0.168831
aperture	R10	10	1.20307	0.225108
aperture	R10	11	1.04266	0.290043
aperture	R10	12	1.36348	0.168831
aperture	R10	13	1.36348	0.168831
aperture	R10	14	1.36348	0.168831
aperture	R10	15	1.36348	0.168831
aperture	R10	16	1.20307	0.225108
aperture	R10	17	1.52388	0.125541
aperture	R10	18	1.52388	0.125541
aperture	R10	19	1.52388	0.125541
aperture	R10	20	1.52388	0.125541
aperture	R10	21	1.52388	0.125541
aperture	R10	22	1.68429	0.0887446
aperture	R10	23	1.68429	0.0887446
aperture	R10	24	1.8447	0.0627706
aperture	R10	25	1.8447	0.0627706
aperture	R10	26	1.8447	0.0627706
aperture	R10	27	1.52388	0.125541
aperture	R10	28	1.68429	0.0887446
aperture	R10	29	1.8447	0.0627706
aperture	R10	30	1.8447	0.0627706
aperture	L1	1	1.20307	0.225108
aperture	L1	2	1.20307	0.225108
aperture	L1	3	1.52388	0.125541
aperture	L1	4	1.52388	0.125541
aperture	L1	5	1.36348	0.168831
aperture	L1	6	1.52388	0.125541
aperture	L1	7	1.52388	0.125541
aperture	L1	8	1.52388	0.125541
aperture	L1	9	1.52388	0.125541
aperture	L1	10	1.20307	0.225108
aperture	L1	11	1.20307	0.225108
aperture	L1	12	1.20307	0.225108
aperture	L1	13	1.20307	0.225108
aperture	L1	14	1.20307	0.225108
aperture	L1	15	1.36348	0.168831
aperture	L1	16	1.36348	0.168831
aperture	L1	17	1.20307	0.225108
aperture	L1	18	1.36348	0.168831
aperture	L1	19	1.68429	0.0887446
aperture	L1	20	1.68429	0.0887446
aperture	L1	21	1.68429	0.0887446
aperture	L1	22	1.68429	0.0887446
aperture	L1	23	1.68429	0.0887446
aperture	L1	24	1.68429	0.0887446
aperture	L1	25	1.68429	0.0887446
aperture	L1	26	1.8447	0.0627706
aperture	L1	27	1.8447	0.0627706
aperture	L1	28	1.8447	0.0627706
aperture	L1	29	1.52388	0.125541
aperture	L1	30	1.52388	0.125541
aperture	L2	1	1.8447	0.0627706
aperture	L2	2	2.00511	0.038961
aperture	L2	3	2.00511	0.038961
aperture	L2	4	2.00511	0.038961
aperture	L2	5	2.16552	0.025974
aperture	L2	6	2.16552	0.025974
aperture	L2	7	2.00511	0.038961
aperture	L2	8	2.00511	0.038961
aperture	L2	9	2.00511	0.038961
aperture	L2	10	1.8447	0.0627706
aperture	L2	11	2.00511	0.038961
aperture	L2	12	2.00511	0.038961
aperture	L2	13	2.00511	0.038961
aperture	L2	14	2.00511	0.038961
aperture	L2	15	2.00511	0.038961
aperture	L2	16	2.00511	0.038961
aperture	L2	17	2.00511	0.038961
aperture	L2	18	2.16552	0.025974
aperture	L2	19	2.16552	0.025974
aperture	L2	20	2.16552	0.025974
aperture	L2	21	2.16552	0.025974
aperture	L2	22	2.16552	0.025974
aperture	L2	23	2.16552	0.025974
aperture	L2	24	2.32593	0.0151515
aperture	L2	25	2.32593	0.0151515
aperture	L2	26	2.32593	0.0151515
aperture	L2	27	2.32593	0.0151515
aperture	L2	28	2.32593	0.0151515
aperture	L2	29	2.32593	0.0151515
aperture	L2	30	2.00511	0.038961
aperture	L3	1	2.00511	0.038961
aperture	L3	2	2.00511	0.038961
aperture	L3	3	2.00511	0.038961
aperture	L3	4	2.00511	0.038961
aperture	L3	5	2.00511	0.038961
aperture	L3	6	2.00511	0.038961
aperture	L3	7	2.00511	0.038961
aperture	L3	8	2.00511	0.038961
aperture	L3	9	2.00511	0.038961
aperture	L3	10	1.8447	0.0627706
aperture	L3	11	1.8447	0.0627706
aperture	L3	12	2.00511	0.038961
aperture	L3	13	2.00511	0.038961
aperture	L3	14	2.00511	0.038961
aperture	L3	15	2.00511	0.038961
aperture	L3	16	1.8447	0.0627706
aperture	L3	17	1.8447	0.0627706
aperture	L3	18	1.52388	0.125541
aperture	L3	19	1.68429	0.0887446
aperture	L3	20	1.8447	0.0627706
aperture	L3	21	1.8447	0.0627706
aperture	L3	22	1.8447	0.0627706
aperture	L3	23	1.8447	0.0627706
aperture	L3	24	1.8447	0.0627706
aperture	L3	25	1.8447	0.0627706
aperture	L3	26	1.8447	0.0627706
aperture	L3	27	1.8447	0.0627706
aperture	L3	28	1.8447	0.0627706
aperture	L3	29	1.8447	0.0627706
aperture	L3	30	1.8447	0.0627706
aperture	L4	1	1.68429	0.0887446
aperture	L4	2	1.52388	0.125541
aperture	L4	3	1.52388	0.125541
aperture	L4	4	1.52388	0.125541
aperture	L4	5	1.68429	0.0887446
aperture	L4	6	1.52388	0.125541
aperture	L4	7	1.52388	0.125541
aperture	L4	8	1.36348	0.168831
aperture	L4	9	1.52388	0.125541
aperture	L4	10	1.52388	0.125541
aperture	L4	11	1.68429	0.0887446
aperture	L4	12	1.68429	0.0887446
aperture	L4	13	1.68429	0.0887446
aperture	L4	14	1.52388	0.125541
aperture	L4	15	1.8447	0.0627706
aperture	L4	16	1.8447	0.0627706
aperture	L4	17	1.8447	0.0627706
aperture	L4	18	1.8447	0.0627706
aperture	L4	19	1.68429	0.0887446
aperture	L4	20	1.68429	0.0887446
aperture	L4	21	1.52388	0.125541
aperture	L4	22	1.52388	0.125541
aperture	L4	23	1.52388	0.125541
aperture	L4	24	1.52388	0.125541
aperture	L4	25	1.52388	0.125541
aperture	L4	26	1.52388	0.125541
aperture	L4	27	1.52388	0.125541
aperture	L4	28	1.36348	0.168831
aperture	L4	29	1.20307	0.225108
aperture	L4	30	1.36348	0.168831
aperture	L5	1	1.19973	0.25
aperture	L5	2	1.19973	0.25
aperture	L5	3	1.19973	0.25
aperture	L5	4	1.19973	0.25
aperture	L5	5	1.19973	0.25
aperture	L5	6	1.19973	0.25
aperture	L5	7	1.19973	0.25
aperture	L5	8	1.19973	0.25
aperture	L5	9	1.19973	0.25
aperture	L5	10	1.19973	0.25
aperture	L5	11	1.19973	0.25
aperture	L5	12	1.49967	0.142857
aperture	L5	13	1.19973	0.25
aperture	L5	14	1.49967	0.142857
aperture	L5	15	1.49967	0.142857
aperture	L5	16	1.49967	0.142857
aperture	L5	17	1.49967	0.142857
aperture	L5	18	1.49967	0.142857
aperture	L5	19	1.49967	0.142857
aperture	L5	20	1.19973	0.25
aperture	L5	21	1.19973	0.25
aperture	L5	22	1.19973	0.25
aperture	L5	23	1.19973	0.25
aperture	L5	24	1.19973	0.25
aperture	L5	25	1.19973	0.25
aperture	L5	26	1.19973	0.25
aperture	L5	27	1.19973	0.25
aperture	L5	28	1.19973	0.25
aperture	L5	29	1.19973	0.25
aperture	L5	30	1.19973	0.25
aperture	L6	1	0.962324	0.333333
aperture	L6	2	0.748474	0.447619
aperture	L6	3	0.748474	0.447619
aperture	L6	4	1.17617	0.247619
aperture	L6	5	1.17617	0.247619
aperture	L6	6	1.17617	0.247619
aperture	L6	7	0.962324	0.333333
aperture	L6	8	0.962324	0.333333
aperture	L6	9	0.962324	0.333333
aperture	L6	10	0.962324	0.333333
aperture	L6	11	0.962324	0.333333
aperture	L6	12	0.962324	0.333333
aperture	L6	13	0.748474	0.447619
aperture	L6	14	0.748474	0.447619
aperture	L6	15	0.748474	0.447619
aperture	L6	16	0.748474	0.447619
aperture	L6	17	0.962324	0.333333
aperture	L6	18	0.962324	0.333333
aperture	L6	19	0.962324	0.333333
aperture	L6	20	0.962324	0.333333
aperture	L6	21	0.962324	0.333333
aperture	L6	22	0.962324	0.333333
aperture	L6	23	1.17617	0.247619
aperture	L6	24	1.17617	0.247619
aperture	L6	25	1.17617	0.247619
aperture	L6	26	1.17617	0.247619
aperture	L6	27	0.962324	0.333333
aperture	L6	28	0.962324	0.333333
aperture	L6	29	0.962324	0.333333
aperture	L6	30	1.17617	0.247619
aperture	O1	1	0.962324	0.333333
aperture	O1	2	0.748474	0.447619
aperture	O1	3	0.748474	0.447619
aperture	O1	4	0.748474	0.447619
aperture	O1	5	0.962324	0.333333
aperture	O1	6	0.962324	0.333333
aperture	O1	7	0.962324	0.333333
aperture	O1	8	0.962324	0.333333
aperture	O1	9	1.17617	0.247619
aperture	O1	10	1.17617	0.247619
aperture	O1	11	1.17617	0.247619
aperture	O1	12	1.17617	0.247619
aperture	O1	13	1.17617	0.247619
aperture	O1	14	1.17617	0.247619
aperture	O1	15	1.17617	0.247619
aperture	O1	16	1.17617	0.247619
aperture	O1	17	1.17617	0.247619
aperture	O1	18	1.17617	0.247619
aperture	O1	19	1.17617	0.247619
aperture	O1	20	1.17617	0.247619
aperture	O1	21	0.962324	0.333333
aperture	O1	22	0.962324	0.333333
aperture	O1	23	0.962324	0.333333
aperture	O1	24	0.962324	0.333333
aperture	O1	25	0.962324	0.333333
aperture	O1	26	0.962324	0.333333
aperture	O1	27	0.962324	0.333333
aperture	O1	28	0.962324	0.333333
aperture	O1	29	0.962324	0.333333
aperture	O1	30	1.17617	0.247619
aperture	O2	1	1.68429	0.0887446
aperture	O2	2	1.68429	0.0887446
aperture	O2	3	1.52388	0.125541
aperture	O2	4	1.52388	0.125541
aperture	O2	5	1.68429	0.0887446
aperture	O2	6	1.52388	0.125541
aperture	O2	7	1.52388	0.125541
aperture	O2	8	1.52388	0.125541
aperture	O2	9	1.68429	0.0887446
aperture	O2	10	1.8447	0.0627706
aperture	O2	11	1.8447	0.0627706
aperture	O2	12	1.8447	0.0627706
aperture	O2	13	1.8447	0.0627706
aperture	O2	14	1.8447	0.0627706
aperture	O2	15	1.8447	0.0627706
aperture	O2	16	1.8447	0.0627706
aperture	O2	17	1.8447	0.0627706
aperture	O2	18	1.68429	0.0887446
aperture	O2	19	1.68429	0.0887446
aperture	O2	20	1.68429	0.0887446
aperture	O2	21	1.68429	0.0887446
aperture	O2	22	1.68429	0.0887446
aperture	O2	23	1.8447	0.0627706
aperture	O2	24	1.8447	0.0627706
aperture	O2	25	1.8447	0.0627706
aperture	O2	26	1.8447	0.0627706
aperture	O2	27	1.8447	0.0627706
aperture	O2	28	1.8447	0.0627706
aperture	O2	29	1.8447	0.0627706
aperture	O2	30	1.8447	0.0627706
aperture	O3	1	1.68429	0.0887446
aperture	O3	2	1.68429	0.0887446
aperture	O3	3	1.68429	0.0887446
aperture	O3	4	1.68429	0.0887446
aperture	O3	5	1.68429	0.0887446
aperture	O3	6	1.52388	0.125541
aperture	O3	7	1.52388	0.125541
aperture	O3	8	1.52388	0.125541
aperture	O3	9	1.52388	0.125541
aperture	O3	10	1.52388	0.125541
aperture	O3	11	1.20307	0.225108
aperture	O3	12	1.36348	0.168831
aperture	O3	13	1.52388	0.125541
aperture	O3	14	1.52388	0.125541
aperture	O3	15	1.52388	0.125541
aperture	O3	16	1.52388	0.125541
aperture	O3	17	1.52388	0.125541
aperture	O3	18	1.68429	0.0887446
aperture	O3	19	1.68429	0.0887446
aperture	O3	20	1.68429	0.0887446
aperture	O3	21	1.68429	0.0887446
aperture	O3	22	1.68429	0.0887446
aperture	O3	23	1.52388	0.125541
aperture	O3	24	1.52388	0.125541
aperture	O3	25	1.52388	0.125541
aperture	O3	26	1.52388	0.125541
aperture	O3	27	1.52388	0.125541
aperture	O3	28	1.52388	0.125541
aperture	O3	29	1.52388	0.125541
aperture	O3	30	1.52388	0.125541
aperture	O4	1	1.36348	0.168831
aperture	O4	2	1.36348	0.168831
aperture	O4	3	1.20307	0.225108
aperture	O4	4	1.20307	0.225108
aperture	O4	5	1.36348	0.168831
aperture	O4	6	1.36348	0.168831
aperture	O4	7	1.20307	0.225108
aperture	O4	8	1.20307	0.225108
aperture	O4	9	1.36348	0.168831
aperture	O4	10	1.36348	0.168831
aperture	O4	11	1.36348	0.168831
aperture	O4	12	1.20307	0.225108
aperture	O4	13	1.20307	0.225108
aperture	O4	14	1.20307	0.225108
aperture	O4	15	1.04266	0.290043
aperture	O4	16	1.04266	0.290043
aperture	O4	17	1.20307	0.225108
aperture	O4	18	1.36348	0.168831
aperture	O4	19	1.20307	0.225108
aperture	O4	20	1.20307	0.225108
aperture	O4	21	1.20307	0.225108
aperture	O4	22	1.36348	0.168831
aperture	O4	23	1.36348	0.168831
aperture	O4	24	1.20307	0.225108
aperture	O4	25	1.52388	0.125541
aperture	O4	26	1.52388	0.125541
aperture	O4	27	1.52388	0.125541
aperture	O4	28	1.52388	0.125541
aperture	O4	29	1.52388	0.125541
aperture	O4	30	1.52388	0.125541
orientation	R10	1	1.20307	0.225108
orientation	R10	2	1.20307	0.225108
orientation	R10	3	1.20307	0.225108
orientation	R10	4	1.20307	0.225108
orientation	R10	5	1.20307	0.225108
orientation	R10	6	1.20307	0.225108
orientation	R10	7	1.20307	0.225108
orientation	R10	8	1.20307	0.225108
orientation	R10	9	1.20307	0.225108
orientation	R10	10	1.20307	0.225108
orientation	R10	11	1.20307	0.225108
orientation	R10	12	1.20307	0.225108
orientation	R10	13	1.20307	0.225108
orientation	R10	14	1.20307	0.225108
orientation	R10	15	1.20307	0.225108
orientation	R10	16	1.04266	0.290043
orientation	R10	17	1.04266	0.290043
orientation	R10	18	0.882249	0.37013
orientation	R10	19	1.04266	0.290043
orientation	R10	20	1.04266	0.290043
orientation	R10	21	1.04266	0.290043
orientation	R10	22	1.04266	0.290043
orientation	R10	23	1.04266	0.290043
orientation	R10	24	1.04266	0.290043
orientation	R10	25	1.04266	0.290043
orientation	R10	26	1.04266	0.290043
orientation	R10	27	1.04266	0.290043
orientation	R10	28	1.04266	0.290043
orientation	R10	29	1.04266	0.290043
orientation	R10	30	1.04266	0.290043
orientation	L1	1	1.04266	0.290043
orientation	L1	2	1.04266	0.290043
orientation	L1	3	0.882249	0.37013
orientation	L1	4	0.882249	0.37013
orientation	L1	5	0.882249	0.37013
orientation	L1	6	0.882249	0.37013
orientation	L1	7	0.882249	0.37013
orientation	L1	8	0.882249	0.37013
orientation	L1	9	0.882249	0.37013
orientation	L1	10	1.04266	0.290043
orientation	L1	11	1.04266	0.290043
orientation	L1	12	1.20307	0.225108
orientation	L1	13	1.20307	0.225108
orientation	L1	14	1.20307	0.225108
orientation	L1	15	1.20307	0.225108
orientation	L1	16	1.20307	0.225108
orientation	L1	17	1.20307	0.225108
orientation	L1	18	1.20307	0.225108
orientation	L1	19	1.20307	0.225108
orientation	L1	20	1.04266	0.290043
orientation	L1	21	0.882249	0.37013
orientation	L1	22	0.882249	0.37013
orientation	L1	23	1.04266	0.290043
orientation	L1	24	1.20307	0.225108
orientation	L1	25	1.20307	0.225108
orientation	L1	26	1.04266	0.290043
orientation	L1	27	0.72184	0.454545
orientation	L1	28	0.882249	0.37013
orientation	L1	29	1.04266	0.290043
orientation	L1	30	1.04266	0.290043
orientation	L2	1	0.72184	0.454545
orientation	L2	2	0.882249	0.37013
orientation	L2	3	0.882249	0.37013
orientation	L2	4	0.882249	0.37013
orientation	L2	5	0.882249	0.37013
orientation	L2	6	0.882249	0.37013
orientation	L2	7	0.882249	0.37013
orientation	L2	8	0.882249	0.37013
orientation	L2	9	0.882249	0.37013
orientation	L2	10	1.20307	0.225108
orientation	L2	11	1.04266	0.290043
orientation	L2	12	1.20307	0.225108
orientation	L2	13	0.882249	0.37013
orientation	L2	14	0.882249	0.37013
orientation	L2	15	1.04266	0.290043
orientation	L2	16	1.20307	0.225108
orientation	L2	17	1.04266	0.290043
orientation	L2	18	1.20307	0.225108
orientation	L2	19	1.36348	0.168831
orientation	L2	20	1.20307	0.225108
orientation	L2	21	1.20307	0.225108
orientation	L2	22	1.20307	0.225108
orientation	L2	23	1.20307	0.225108
orientation	L2	24	0.882249	0.37013
orientation	L2	25	1.04266	0.290043
orientation	L2	26	1.04266	0.290043
orientation	L2	27	1.20307	0.225108
orientation	L2	28	0.882249	0.37013
orientation	L2	29	0.882249	0.37013
orientation	L2	30	0.882249	0.37013
orientation	L3	1	0.882249	0.37013
orientation	L3	2	0.882249	0.37013
orientation	L3	3	0.72184	0.454545
orientation	L3	4	0.561431	0.554113
orientation	L3	5	0.561431	0.554113
orientation	L3	6	0.561431	0.554113
orientation	L3	7	0.882249	0.37013
orientation	L3	8	0.882249	0.37013
orientation	L3	9	0.882249	0.37013
orientation	L3	10	0.882249	0.37013
orientation	L3	11	1.04266	0.290043
orientation	L3	12	1.04266	0.290043
orientation	L3	13	1.04266	0.290043
orientation	L3	14	1.04266	0.290043
orientation	L3	15	1.04266	0.290043
orientation	L3	16	1.04266	0.290043
orientation	L3	17	1.04266	0.290043
orientation	L3	18	1.04266	0.290043
orientation	L3	19	1.04266	0.290043
orientation	L3	20	1.04266	0.290043
orientation	L3	21	1.04266	0.290043
orientation	L3	22	1.04266	0.290043
orientation	L3	23	1.04266	0.290043
orientation	L3	24	1.04266	0.290043
orientation	L3	25	1.04266	0.290043
orientation	L3	26	1.04266	0.290043
orientation	L3	27	1.04266	0.290043
orientation	L3	28	1.04266	0.290043
orientation	L3	29	1.04266	0.290043
orientation	L3	30	0.882249	0.37013
orientation	L4	1	0.72184	0.454545
orientation	L4	2	1.04266	0.290043
orientation	L4	3	0.882249	0.37013
orientation	L4	4	1.04266	0.290043
orientation	L4	5	0.882249	0.37013
orientation	L4	6	1.04266	0.290043
orientation	L4	7	1.20307	0.225108
orientation	L4	8	1.04266	0.290043
orientation	L4	9	0.882249	0.37013
orientation	L4	10	0.882249	0.37013
orientation	L4	11	0.882249	0.37013
orientation	L4	12	0.72184	0.454545
orientation	L4	13	0.561431	0.554113
orientation	L4	14	0.561431	0.554113
orientation	L4	15	0.561431	0.554113
orientation	L4	16	0.401022	0.660173
orientation	L4	17	0.401022	0.660173
orientation	L4	18	0.240613	0.777056
orientation	L4	19	0.401022	0.660173
orientation	L4	20	0.240613	0.777056
orientation	L4	21	0.240613	0.777056
orientation	L4	22	0.240613	0.777056
orientation	L4	23	0.240613	0.777056
orientation	L4	24	0.240613	0.777056
orientation	L4	25	0.240613	0.777056
orientation	L4	26	0.240613	0.777056
orientation	L4	27	0.240613	0.777056
orientation	L4	28	0.240613	0.777056
orientation	L4	29	0.401022	0.660173
orientation	L4	30	0.401022	0.660173
orientation	L5	1	0.599866	0.535714
orientation	L5	2	0.599866	0.535714
orientation	L5	3	0.599866	0.535714
orientation	L5	4	0.599866	0.535714
orientation	L5	5	0.599866	0.535714
orientation	L5	6	0.299933	0.714286
orientation	L5	7	0.299933	0.714286
orientation	L5	8	0.299933	0.714286
orientation	L5	9	0.299933	0.714286
orientation	L5	10	0.299933	0.714286
orientation	L5	11	0.299933	0.714286
orientation	L5	12	0.299933	0.714286
orientation	L5	13	0.299933	0.714286
orientation	L5	14	0.299933	0.714286
orientation	L5	15	0.299933	0.714286
orientation	L5	16	0.299933	0.714286
orientation	L5	17	0.299933	0.714286
orientation	L5	18	0.299933	0.714286
orientation	L5	19	0.299933	0.714286
orientation	L5	20	0.299933	0.714286
orientation	L5	21	0.299933	0.714286
orientation	L5	22	0.299933	0.714286
orientation	L5	23	0.299933	0.714286
orientation	L5	24	0.599866	0.535714
orientation	L5	25	0.599866	0.535714
orientation	L5	26	0.599866	0.535714
orientation	L5	27	0.299933	0.714286
orientation	L5	28	0.299933	0.714286
orientation	L5	29	0.299933	0.714286
orientation	L5	30	0.299933	0.714286
orientation	L6	1	0.962324	0.333333
orientation	L6	2	0.962324	0.333333
orientation	L6	3	0.748474	0.447619
orientation	L6	4	0.962324	0.333333
orientation	L6	5	0.748474	0.447619
orientation	L6	6	0.534624	0.571429
orientation	L6	7	0.748474	0.447619
orientation	L6	8	0.534624	0.571429
orientation	L6	9	0.748474	0.447619
orientation	L6	10	0.748474	0.447619
orientation	L6	11	0.748474	0.447619
orientation	L6	12	0.748474	0.447619
orientation	L6	13	0.962324	0.333333
orientation	L6	14	0.962324	0.333333
orientation	L6	15	0.962324	0.333333
orientation	L6	16	0.962324	0.333333
orientation	L6	17	1.17617	0.247619
orientation	L6	18	1.17617	0.247619
orientation	L6	19	0.962324	0.333333
orientation	L6	20	0.962324	0.333333
orientation	L6	21	0.962324	0.333333
orientation	L6	22	1.17617	0.247619
orientation	L6	23	1.39002	0.161905
orientation	L6	24	1.39002	0.161905
orientation	L6	25	1.39002	0.161905
orientation	L6	26	1.39002	0.161905
orientation	L6	27	1.39002	0.161905
orientation	L6	28	1.17617	0.247619
orientation	L6	29	1.17617	0.247619
orientation	L6	30	1.17617	0.247619
orientation	O1	1	0.748474	0.447619
orientation	O1	2	0.748474	0.447619
orientation	O1	3	0.748474	0.447619
orientation	O1	4	0.748474	0.447619
orientation	O1	5	0.748474	0.447619
orientation	O1	6	0.962324	0.333333
orientation	O1	7	0.962324	0.333333
orientation	O1	8	1.17617	0.247619
orientation	O1	9	0.962324	0.333333
orientation	O1	10	0.748474	0.447619
orientation	O1	11	0.748474	0.447619
orientation	O1	12	0.748474	0.447619
orientation	O1	13	0.962324	0.333333
orientation	O1	14	0.962324	0.333333
orientation	O1	15	0.962324	0.333333
orientation	O1	16	0.962324	0.333333
orientation	O1	17	0.962324	0.333333
orientation	O1	18	0.962324	0.333333
orientation	O1	19	0.962324	0.333333
orientation	O1	20	0.962324	0.333333
orientation	O1	21	0.962324	0.333333
orientation	O1	22	0.962324	0.333333
orientation	O1	23	0.962324	0.333333
orientation	O1	24	0.962324	0.333333
orientation	O1	25	0.962324	0.333333
orientation	O1	26	0.962324	0.333333
orientation	O1	27	0.962324	0.333333
orientation	O1	28	0.962324	0.333333
orientation	O1	29	0.962324	0.333333
orientation	O1	30	0.962324	0.333333
orientation	O2	1	1.52388	0.125541
orientation	O2	2	1.04266	0.290043
orientation	O2	3	0.882249	0.37013
orientation	O2	4	1.04266	0.290043
orientation	O2	5	1.04266	0.290043
orientation	O2	6	1.20307	0.225108
orientation	O2	7	1.04266	0.290043
orientation	O2	8	1.20307	0.225108
orientation	O2	9	1.20307	0.225108
orientation	O2	10	1.20307	0.225108
orientation	O2	11	1.20307	0.225108
orientation	O2	12	1.20307	0.225108
orientation	O2	13	1.04266	0.290043
orientation	O2	14	1.20307	0.225108
orientation	O2	15	1.20307	0.225108
orientation	O2	16	1.20307	0.225108
orientation	O2	17	1.36348	0.168831
orientation	O2	18	1.36348	0.168831
orientation	O2	19	1.36348	0.168831
orientation	O2	20	1.52388	0.125541
orientation	O2	21	1.52388	0.125541
orientation	O2	22	1.52388	0.125541
orientation	O2	23	1.52388	0.125541
orientation	O2	24	1.36348	0.168831
orientation	O2	25	1.36348	0.168831
orientation	O2	26	1.36348	0.168831
orientation	O2	27	1.36348	0.168831
orientation	O2	28	1.36348	0.168831
orientation	O2	29	1.36348	0.168831
orientation	O2	30	1.20307	0.225108
orientation	O3	1	1.36348	0.168831
orientation	O3	2	1.36348	0.168831
orientation	O3	3	1.36348	0.168831
orientation	O3	4	1.52388	0.125541
orientation	O3	5	1.36348	0.168831
orientation	O3	6	1.36348	0.168831
orientation	O3	7	1.36348	0.168831
orientation	O3	8	1.36348	0.168831
orientation	O3	9	1.36348	0.168831
orientation	O3	10	1.36348	0.168831
orientation	O3	11	1.36348	0.168831
orientation	O3	12	1.36348	0.168831
orientation	O3	13	1.36348	0.168831
orientation	O3	14	1.36348	0.168831
orientation	O3	15	1.36348	0.168831
orientation	O3	16	1.36348	0.168831
orientation	O3	17	1.36348	0.168831
orientation	O3	18	1.20307	0.225108
orientation	O3	19	1.20307	0.225108
orientation	O3	20	1.20307	0.225108
orientation	O3	21	1.36348	0.168831
orientation	O3	22	1.36348	0.168831
orientation	O3	23	1.36348	0.168831
orientation	O3	24	1.04266	0.290043
orientation	O3	25	1.04266	0.290043
orientation	O3	26	1.04266	0.290043
orientation	O3	27	1.04266	0.290043
orientation	O3	28	1.04266	0.290043
orientation	O3	29	1.04266	0.290043
orientation	O3	30	0.882249	0.37013
orientation	O4	1	1.04266	0.290043
orientation	O4	2	1.04266	0.290043
orientation	O4	3	0.882249	0.37013
orientation	O4	4	0.882249	0.37013
orientation	O4	5	0.882249	0.37013
orientation	O4	6	0.882249	0.37013
orientation	O4	7	0.882249	0.37013
orientation	O4	8	1.04266	0.290043
orientation	O4	9	1.04266	0.290043
orientation	O4	10	1.20307	0.225108
orientation	O4	11	1.20307	0.225108
orientation	O4	12	1.36348	0.168831
orientation	O4	13	1.36348	0.168831
orientation	O4	14	1.36348	0.168831
orientation	O4	15	1.36348	0.168831
orientation	O4	16	1.36348	0.168831
orientation	O4	17	1.36348	0.168831
orientation	O4	18	1.36348	0.168831
orientation	O4	19	1.36348	0.168831
orientation	O4	20	1.36348	0.168831
orientation	O4	21	1.36348	0.168831
orientation	O4	22	1.36348	0.168831
orientation	O4	23	1.36348	0.168831
orientation	O4	24	1.20307	0.225108
orientation	O4	25	1.36348	0.168831
orientation	O4	26	1.52388	0.125541
orientation	O4	27	1.52388	0.125541
orientation	O4	28	1.68429	0.0887446
orientation	O4	29	1.68429	0.0887446
orientation	O4	30	1.68429	0.0887446
velocity	R10	1	2.16552	0.025974
velocity	R10	2	2.00511	0.038961
velocity	R10	3	2.00511	0.038961
velocity	R10	4	2.00511	0.038961
velocity	R10	5	2.00511	0.038961
velocity	R10	6	2.00511	0.038961
velocity	R10	7	2.00511	0.038961
velocity	R10	8	1.68429	0.0887446
velocity	R10	9	1.8447	0.0627706
velocity	R10	10	1.8447	0.0627706
velocity	R10	11	1.8447	0.0627706
velocity	R10	12	1.8447	0.0627706
velocity	R10	13	1.8447	0.0627706
velocity	R10	14	1.8447	0.0627706
velocity	R10	15	1.8447	0.0627706
velocity	R10	16	2.00511	0.038961
velocity	R10	17	2.00511	0.038961
velocity	R10	18	2.00511	0.038961
velocity	R10	19	2.00511	0.038961
velocity	R10	20	2.00511	0.038961
velocity	R10	21	2.00511	0.038961
velocity	R10	22	2.00511	0.038961
velocity	R10	23	2.00511	0.038961
velocity	R10	24	2.00511	0.038961
velocity	R10	25	2.16552	0.025974
velocity	R10	26	2.16552	0.025974
velocity	R10	27	2.16552	0.025974
velocity	R10	28	2.16552	0.025974
velocity	R10	29	2.16552	0.025974
velocity	R10	30	2.16552	0.025974
velocity	L1	1	1.52388	0.125541
velocity	L1	2	1.52388	0.125541
velocity	L1	3	1.36348	0.168831
velocity	L1	4	1.36348	0.168831
velocity	L1	5	1.52388	0.125541
velocity	L1	6	1.52388	0.125541
velocity	L1	7	1.52388	0.125541
velocity	L1	8	1.52388	0.125541
velocity	L1	9	1.52388	0.125541
velocity	L1	10	1.52388	0.125541
velocity	L1	11	1.52388	0.125541
velocity	L1	12	1.52388	0.125541
velocity	L1	13	1.52388	0.125541
velocity	L1	14	1.52388	0.125541
velocity	L1	15	1.52388	0.125541
velocity	L1	16	1.52388	0.125541
velocity	L1	17	1.52388	0.125541
velocity	L1	18	1.52388	0.125541
velocity	L1	19	1.36348	0.168831
velocity	L1	20	1.36348	0.168831
velocity	L1	21	1.36348	0.168831
velocity	L1	22	1.36348	0.168831
velocity	L1	23	1.36348	0.168831
velocity	L1	24	1.52388	0.125541
velocity	L1	25	1.52388	0.125541
velocity	L1	26	1.52388	0.125541
velocity	L1	27	1.52388	0.125541
velocity	L1	28	1.52388	0.125541
velocity	L1	29	1.52388	0.125541
velocity	L1	30	1.52388	0.125541
velocity	L2	1	1.36348	0.168831
velocity	L2	2	1.36348	0.168831
velocity	L2	3	1.36348	0.168831
velocity	L2	4	1.36348	0.168831
velocity	L2	5	1.36348	0.168831
velocity	L2	6	1.36348	0.168831
velocity	L2	7	1.36348	0.168831
velocity	L2	8	1.20307	0.225108
velocity	L2	9	1.20307	0.225108
velocity	L2	10	1.04266	0.290043
velocity	L2	11	1.20307	0.225108
velocity	L2	12	1.04266	0.290043
velocity	L2	13	0.882249	0.37013
velocity	L2	14	0.882249	0.37013
velocity	L2	15	1.04266	0.290043
velocity	L2	16	1.20307	0.225108
velocity	L2	17	1.36348	0.168831
velocity	L2	18	1.20307	0.225108
velocity	L2	19	1.36348	0.168831
velocity	L2	20	1.36348	0.168831
velocity	L2	21	1.20307	0.225108
velocity	L2	22	1.04266	0.290043
velocity	L2	23	1.20307	0.225108
velocity	L2	24	1.04266	0.290043
velocity	L2	25	1.04266	0.290043
velocity	L2	26	1.04266	0.290043
velocity	L2	27	1.04266	0.290043
velocity	L2	28	1.20307	0.225108
velocity	L2	29	1.20307	0.225108
velocity	L2	30	1.20307	0.225108
velocity	L3	1	0.882249	0.37013
velocity	L3	2	0.882249	0.37013
velocity	L3	3	0.882249	0.37013
velocity	L3	4	0.882249	0.37013
velocity	L3	5	0.882249	0.37013
velocity	L3	6	0.882249	0.37013
velocity	L3	7	0.882249	0.37013
velocity	L3	8	0.882249	0.37013
velocity	L3	9	1.20307	0.225108
velocity	L3	10	1.04266	0.290043
velocity	L3	11	1.04266	0.290043
velocity	L3	12	1.20307	0.225108
velocity	L3	13	1.20307	0.225108
velocity	L3	14	1.20307	0.225108
velocity	L3	15	1.20307	0.225108
velocity	L3	16	1.20307	0.225108
velocity	L3	17	1.04266	0.290043
velocity	L3	18	1.20307	0.225108
velocity	L3	19	1.04266	0.290043
velocity	L3	20	1.04266	0.290043
velocity	L3	21	1.20307	0.225108
velocity	L3	22	1.04266	0.290043
velocity	L3	23	0.882249	0.37013
velocity	L3	24	0.882249	0.37013
velocity	L3	25	1.04266	0.290043
velocity	L3	26	1.04266	0.290043
velocity	L3	27	1.20307	0.225108
velocity	L3	28	1.04266	0.290043
velocity	L3	29	1.20307	0.225108
velocity	L3	30	1.20307	0.225108
velocity	L4	1	1.20307	0.225108
velocity	L4	2	1.20307	0.225108
velocity	L4	3	1.52388	0.125541
velocity	L4	4	1.36348	0.168831
velocity	L4	5	1.04266	0.290043
velocity	L4	6	1.04266	0.290043
velocity	L4	7	1.20307	0.225108
velocity	L4	8	1.04266	0.290043
velocity	L4	9	1.20307	0.225108
velocity	L4	10	1.20307	0.225108
velocity	L4	11	1.04266	0.290043
velocity	L4	12	1.04266	0.290043
velocity	L4	13	1.04266	0.290043
velocity	L4	14	1.04266	0.290043
velocity	L4	15	1.04266	0.290043
velocity	L4	16	1.36348	0.168831
velocity	L4	17	1.20307	0.225108
velocity	L4	18	1.36348	0.168831
velocity	L4	19	1.36348	0.168831
velocity	L4	20	1.36348	0.168831
velocity	L4	21	1.36348	0.168831
velocity	L4	22	1.36348	0.168831
velocity	L4	23	1.52388	0.125541
velocity	L4	24	1.36348	0.168831
velocity	L4	25	1.20307	0.225108
velocity	L4	26	1.36348	0.168831
velocity	L4	27	1.36348	0.168831
velocity	L4	28	1.36348	0.168831
velocity	L4	29	1.52388	0.125541
velocity	L4	30	1.52388	0.125541
velocity	L5	1	0.599866	0.535714
velocity	L5	2	0.599866	0.535714
velocity	L5	3	0.599866	0.535714
velocity	L5	4	0.599866	0.535714
velocity	L5	5	0.599866	0.535714
velocity	L5	6	0.599866	0.535714
velocity	L5	7	0.599866	0.535714
velocity	L5	8	0.599866	0.535714
velocity	L5	9	0.599866	0.535714
velocity	L5	10	0.599866	0.535714
velocity	L5	11	0.599866	0.535714
velocity	L5	12	0.599866	0.535714
velocity	L5	13	0.599866	0.535714
velocity	L5	14	0.599866	0.535714
velocity	L5	15	0.599866	0.535714
velocity	L5	16	0.599866	0.535714
velocity	L5	17	0.599866	0.535714
velocity	L5	18	0.599866	0.535714
velocity	L5	19	0.599866	0.535714
velocity	L5	20	0.599866	0.535714
velocity	L5	21	0.599866	0.535714
velocity	L5	22	0.599866	0.535714
velocity	L5	23	0.599866	0.535714
velocity	L5	24	0.599866	0.535714
velocity	L5	25	0.599866	0.535714
velocity	L5	26	0.899799	0.357143
velocity	L5	27	0.899799	0.357143
velocity	L5	28	0.899799	0.357143
velocity	L5	29	0.899799	0.357143
velocity	L5	30	0.899799	0.357143
velocity	L6	1	0.962324	0.333333
velocity	L6	2	0.748474	0.447619
velocity	L6	3	0.748474	0.447619
velocity	L6	4	0.748474	0.447619
velocity	L6	5	0.748474	0.447619
velocity	L6	6	0.962324	0.333333
velocity	L6	7	0.748474	0.447619
velocity	L6	8	0.534624	0.571429
velocity	L6	9	0.534624	0.571429
velocity	L6	10	0.748474	0.447619
velocity	L6	11	0.748474	0.447619
velocity	L6	12	0.962324	0.333333
velocity	L6	13	0.748474	0.447619
velocity	L6	14	0.962324	0.333333
velocity	L6	15	0.748474	0.447619
velocity	L6	16	0.962324	0.333333
velocity	L6	17	0.962324	0.333333
velocity	L6	18	0.962324	0.333333
velocity	L6	19	0.962324	0.333333
velocity	L6	20	0.748474	0.447619
velocity	L6	21	0.962324	0.333333
velocity	L6	22	0.748474	0.447619
velocity	L6	23	0.534624	0.571429
velocity	L6	24	0.748474	0.447619
velocity	L6	25	0.748474	0.447619
velocity	L6	26	0.962324	0.333333
velocity	L6	27	0.962324	0.333333
velocity	L6	28	0.962324	0.333333
velocity	L6	29	0.962324	0.333333
velocity	L6	30	0.748474	0.447619
velocity	O1	1	0.962324	0.333333
velocity	O1	2	1.17617	0.247619
velocity	O1	3	0.748474	0.447619
velocity	O1	4	1.17617	0.247619
velocity	O1	5	1.17617	0.247619
velocity	O1	6	1.17617	0.247619
velocity	O1	7	1.39002	0.161905
velocity	O1	8	1.17617	0.247619
velocity	O1	9	1.39002	0.161905
velocity	O1	10	1.39002	0.161905
velocity	O1	11	1.39002	0.161905
velocity	O1	12	1.17617	0.247619
velocity	O1	13	1.17617	0.247619
velocity	O1	14	1.17617	0.247619
velocity	O1	15	1.17617	0.247619
velocity	O1	16	1.60387	0.114286
velocity	O1	17	1.60387	0.114286
velocity	O1	18	1.60387	0.114286
velocity	O1	19	1.60387	0.114286
velocity	O1	20	1.60387	0.114286
velocity	O1	21	1.39002	0.161905
velocity	O1	22	1.60387	0.114286
velocity	O1	23	1.60387	0.114286
velocity	O1	24	1.60387	0.114286
velocity	O1	25	1.60387	0.114286
velocity	O1	26	1.39002	0.161905
velocity	O1	27	1.39002	0.161905
velocity	O1	28	1.60387	0.114286
velocity	O1	29	1.60387	0.114286
velocity	O1	30	1.39002	0.161905
velocity	O2	1	1.52388	0.125541
velocity	O2	2	1.52388	0.125541
velocity	O2	3	1.52388	0.125541
velocity	O2	4	1.36348	0.168831
velocity	O2	5	1.36348	0.168831
velocity	O2	6	1.36348	0.168831
velocity	O2	7	1.36348	0.168831
velocity	O2	8	1.36348	0.168831
velocity	O2	9	1.20307	0.225108
velocity	O2	10	1.20307	0.225108
velocity	O2	11	1.20307	0.225108
velocity	O2	12	1.20307	0.225108
velocity	O2	13	1.20307	0.225108
velocity	O2	14	1.04266	0.290043
velocity	O2	15	1.04266	0.290043
velocity	O2	16	1.04266	0.290043
velocity	O2	17	1.04266	0.290043
velocity	O2	18	1.04266	0.290043
velocity	O2	19	1.04266	0.290043
velocity	O2	20	1.04266	0.290043
velocity	O2	21	1.04266	0.290043
velocity	O2	22	1.04266	0.290043
velocity	O2	23	1.04266	0.290043
velocity	O2	24	1.04266	0.290043
velocity	O2	25	1.04266	0.290043
velocity	O2	26	1.04266	0.290043
velocity	O2	27	0.72184	0.454545
velocity	O2	28	0.72184	0.454545
velocity	O2	29	0.72184	0.454545
velocity	O2	30	0.72184	0.454545
velocity	O3	1	1.52388	0.125541
velocity	O3	2	1.52388	0.125541
velocity	O3	3	1.52388	0.125541
velocity	O3	4	1.36348	0.168831
velocity	O3	5	1.52388	0.125541
velocity	O3	6	1.52388	0.125541
velocity	O3	7	1.52388	0.125541
velocity	O3	8	1.52388	0.125541
velocity	O3	9	1.52388	0.125541
velocity	O3	10	1.52388	0.125541
velocity	O3	11	1.52388	0.125541
velocity	O3	12	1.52388	0.125541
velocity	O3	13	1.52388	0.125541
velocity	O3	14	1.52388	0.125541
velocity	O3	15	1.52388	0.125541
velocity	O3	16	1.52388	0.125541
velocity	O3	17	1.52388	0.125541
velocity	O3	18	1.52388	0.125541
velocity	O3	19	1.52388	0.125541
velocity	O3	20	1.52388	0.125541
velocity	O3	21	1.52388	0.125541
velocity	O3	22	1.52388	0.125541
velocity	O3	23	1.52388	0.125541
velocity	O3	24	1.52388	0.125541
velocity	O3	25	1.52388	0.125541
velocity	O3	26	1.52388	0.125541
velocity	O3	27	1.52388	0.125541
velocity	O3	28	1.52388	0.125541
velocity	O3	29	1.52388	0.125541
velocity	O3	30	1.52388	0.125541
velocity	O4	1	1.52388	0.125541
velocity	O4	2	1.52388	0.125541
velocity	O4	3	1.52388	0.125541
velocity	O4	4	1.52388	0.125541
velocity	O4	5	1.52388	0.125541
velocity	O4	6	1.52388	0.125541
velocity	O4	7	1.52388	0.125541
velocity	O4	8	1.52388	0.125541
velocity	O4	9	1.52388	0.125541
velocity	O4	10	1.52388	0.125541
velocity	O4	11	1.52388	0.125541
velocity	O4	12	1.52388	0.125541
velocity	O4	13	1.52388	0.125541
velocity	O4	14	1.52388	0.125541
velocity	O4	15	1.52388	0.125541
velocity	O4	16	1.52388	0.125541
velocity	O4	17	1.52388	0.125541
velocity	O4	18	1.52388	0.125541
velocity	O4	19	1.52388	0.125541
velocity	O4	20	1.52388	0.125541
velocity	O4	21	1.52388	0.125541
velocity	O4	22	1.52388	0.125541
velocity	O4	23	1.52388	0.125541
velocity	O4	24	1.52388	0.125541
velocity	O4	25	1.52388	0.125541
velocity	O4	26	1.52388	0.125541
velocity	O4	27	1.52388	0.125541
velocity	O4	28	1.52388	0.125541
velocity	O4	29	1.52388	0.125541
velocity	O4	30	1.52388	0.125541
