# Supplementary material for: Precisely timed dopamine signals establish distinct kinematic representations of skilled movements
Source: eLife. 2020 Nov 27;9:e61591. doi: 10.7554/eLife.61591 (PMC7861618; doi:10.7554/eLife.61591)
Supplement: Figure 7—figure supplement 8—source data 2. — A .xlsx file containing statistical output for paired t-test comparisons between ‘laser on’ and ‘retraining’ sessions and between ‘laser on’ and ‘occluded’ sessions for Arch During and ChR2 Between groups. ‘Z Block’ is the 10 groups of trials stratified by their maximum zdigit2 extent. [file elife-61591-fig7-figsupp8-data2.xlsx]

## Sheet: Sheet1
Analysis	Group	Comparison	Z Block	df	t	p
number_trials	Arch During	laser - retraining	1	5	1.7187	0.1463
number_trials	Arch During	laser - retraining	2	5	2.17	0.0821
number_trials	Arch During	laser - retraining	3	5	1.6522	0.1594
number_trials	Arch During	laser - retraining	4	5	2.4808	0.0558
number_trials	Arch During	laser - retraining	5	5	2.5143	0.0535
number_trials	Arch During	laser - retraining	6	5	2.3329	0.067
number_trials	Arch During	laser - retraining	7	5	1.9646	0.1067
number_trials	Arch During	laser - retraining	8	5	1.1578	0.2992
number_trials	Arch During	laser - retraining	9	5	1.0238	0.3529
number_trials	Arch During	laser - retraining	10	5	1.3147	0.2457
number_trials	Arch During	laser - occluded	1	5	-1.8137	0.1295
number_trials	Arch During	laser - occluded	2	5	-1.7349	0.1433
number_trials	Arch During	laser - occluded	3	5	-1.7957	0.1325
number_trials	Arch During	laser - occluded	4	5	-2.2643	0.073
number_trials	Arch During	laser - occluded	5	5	-2.9184	0.0331
number_trials	Arch During	laser - occluded	6	5	-2.5613	0.0506
number_trials	Arch During	laser - occluded	7	5	-1.5974	0.1711
number_trials	Arch During	laser - occluded	8	5	-1.6541	0.159
number_trials	Arch During	laser - occluded	9	5	-1.5355	0.1853
number_trials	Arch During	laser - occluded	10	5	-1.3105	0.247
number_trials	Arch Between	laser - retraining	1	3	-1.3116	0.281
number_trials	Arch Between	laser - retraining	2	3	-1	0.391
number_trials	Arch Between	laser - retraining	3	3	-1.456	0.2414
number_trials	Arch Between	laser - retraining	4	3	-0.8812	0.4431
number_trials	Arch Between	laser - retraining	5	3	-0.7125	0.5276
number_trials	Arch Between	laser - retraining	6	3	2.2235	0.1127
number_trials	Arch Between	laser - retraining	7	3	1.7903	0.1713
number_trials	Arch Between	laser - retraining	8	3	1.5298	0.2236
number_trials	Arch Between	laser - retraining	9	3	1.7616	0.1764
number_trials	Arch Between	laser - retraining	10	3	0.5852	0.5995
number_trials	Arch Between	laser - occluded	1	3	-0.9697	0.4037
number_trials	Arch Between	laser - occluded	2	3	-0.8517	0.457
number_trials	Arch Between	laser - occluded	3	3	1.2026	0.3154
number_trials	Arch Between	laser - occluded	4	3	0.8099	0.4773
number_trials	Arch Between	laser - occluded	5	3	-0.5977	0.5922
number_trials	Arch Between	laser - occluded	6	3	-0.5332	0.6309
number_trials	Arch Between	laser - occluded	7	3	-0.7429	0.5114
number_trials	Arch Between	laser - occluded	8	3	0.6975	0.5357
number_trials	Arch Between	laser - occluded	9	3	1.3254e-16	1
number_trials	Arch Between	laser - occluded	10	3	-3.2325e-16	1
success rate	Arch During	laser - retraining	1	1	1	0.5
success rate	Arch During	laser - retraining	2	1	2.3333	0.2578
success rate	Arch During	laser - retraining	3	1	0.1499	0.9053
success rate	Arch During	laser - retraining	4	1	2.304	0.2607
success rate	Arch During	laser - retraining	5	1	3.7086	0.1677
success rate	Arch During	laser - retraining	6	4	-0.4676	0.6644
success rate	Arch During	laser - retraining	7	4	2.3969	0.0746
success rate	Arch During	laser - retraining	8	4	1.1452	0.316
success rate	Arch During	laser - retraining	9	4	0.5645	0.6026
success rate	Arch During	laser - retraining	10	4	2.0243	0.1129
success rate	Arch During	laser - occluded	1	1	-4.5714	0.1371
success rate	Arch During	laser - occluded	2	2	-1.3293	0.3151
success rate	Arch During	laser - occluded	3	1	1.5826	0.3588
success rate	Arch During	laser - occluded	4	1	3.369	0.1837
success rate	Arch During	laser - occluded	5	2	-0.537	0.645
success rate	Arch During	laser - occluded	6	4	0.587	0.5887
success rate	Arch During	laser - occluded	7	4	-0.4689	0.6635
success rate	Arch During	laser - occluded	8	4	-0.2156	0.8399
success rate	Arch During	laser - occluded	9	5	-1.1692	0.295
success rate	Arch During	laser - occluded	10	5	-2.2285	0.0763
success rate	Arch Between	laser - retraining	1	NA	NA	NA
success rate	Arch Between	laser - retraining	2	1	-2.2491	0.2663
success rate	Arch Between	laser - retraining	3	NA	NA	NA
success rate	Arch Between	laser - retraining	4	1	-0.7973	0.5715
success rate	Arch Between	laser - retraining	5	2	-1.3175	0.3183
success rate	Arch Between	laser - retraining	6	3	0.4584	0.6778
success rate	Arch Between	laser - retraining	7	3	1.2329	0.3054
success rate	Arch Between	laser - retraining	8	3	-1.1068	0.3492
success rate	Arch Between	laser - retraining	9	2	-2.0938	0.1713
success rate	Arch Between	laser - retraining	10	2	0.0374	0.9735
success rate	Arch Between	laser - occluded	1	NA	NA	NA
success rate	Arch Between	laser - occluded	2	NA	NA	NA
success rate	Arch Between	laser - occluded	3	2	-1.852	0.2052
success rate	Arch Between	laser - occluded	4	2	1.9403	0.1919
success rate	Arch Between	laser - occluded	5	2	0.1084	0.9236
success rate	Arch Between	laser - occluded	6	3	1.5959	0.2088
success rate	Arch Between	laser - occluded	7	3	-0.8093	0.4776
success rate	Arch Between	laser - occluded	8	3	-0.4344	0.6934
success rate	Arch Between	laser - occluded	9	2	0.1012	0.9286
success rate	Arch Between	laser - occluded	10	2	1.6904	0.233
aperture	Arch During	laser - retraining	1	1	-1.5689	0.3612
aperture	Arch During	laser - retraining	2	1	1.2323	0.434
aperture	Arch During	laser - retraining	3	1	0.5904	0.6605
aperture	Arch During	laser - retraining	4	1	-2.318	0.2593
aperture	Arch During	laser - retraining	5	1	-4.1874	0.1492
aperture	Arch During	laser - retraining	6	4	-0.8645	0.4361
aperture	Arch During	laser - retraining	7	4	0.2334	0.8269
aperture	Arch During	laser - retraining	8	4	0.2904	0.7859
aperture	Arch During	laser - retraining	9	4	-0.5892	0.5874
aperture	Arch During	laser - retraining	10	4	-0.6538	0.5489
aperture	Arch During	laser - occluded	1	1	-0.1088	0.931
aperture	Arch During	laser - occluded	2	2	-1.6177	0.2471
aperture	Arch During	laser - occluded	3	1	-0.3984	0.7586
aperture	Arch During	laser - occluded	4	1	-2.2279	0.2686
aperture	Arch During	laser - occluded	5	2	-2.282	0.15
aperture	Arch During	laser - occluded	6	4	-0.6072	0.5765
aperture	Arch During	laser - occluded	7	4	-1.7392	0.157
aperture	Arch During	laser - occluded	8	4	-0.7791	0.4794
aperture	Arch During	laser - occluded	9	5	-0.4957	0.6411
aperture	Arch During	laser - occluded	10	5	0.9713	0.376
aperture	Arch Between	laser - retraining	1	NA	NA	NA
aperture	Arch Between	laser - retraining	2	1	0.1396	0.9117
aperture	Arch Between	laser - retraining	3	NA	NA	NA
aperture	Arch Between	laser - retraining	4	1	1.0156	0.4951
aperture	Arch Between	laser - retraining	5	2	-0.1029	0.9274
aperture	Arch Between	laser - retraining	6	3	0.8971	0.4358
aperture	Arch Between	laser - retraining	7	3	0.7099	0.529
aperture	Arch Between	laser - retraining	8	3	1.6227	0.2031
aperture	Arch Between	laser - retraining	9	2	2.7257	0.1124
aperture	Arch Between	laser - retraining	10	2	3.2646	0.0824
aperture	Arch Between	laser - occluded	1	NA	NA	NA
aperture	Arch Between	laser - occluded	2	NA	NA	NA
aperture	Arch Between	laser - occluded	3	2	-1.2956	0.3245
aperture	Arch Between	laser - occluded	4	2	-1.3542	0.3084
aperture	Arch Between	laser - occluded	5	2	-1.6646	0.2379
aperture	Arch Between	laser - occluded	6	3	-0.6353	0.5704
aperture	Arch Between	laser - occluded	7	3	-2.8342	0.066
aperture	Arch Between	laser - occluded	8	3	-1.9565	0.1454
aperture	Arch Between	laser - occluded	9	2	-3.9828	0.0576
aperture	Arch Between	laser - occluded	10	2	-2.2404	0.1544
orientation	Arch During	laser - retraining	1	1	-5.4225	0.1161
orientation	Arch During	laser - retraining	2	1	-0.3669	0.7761
orientation	Arch During	laser - retraining	3	1	-1.1181	0.4646
orientation	Arch During	laser - retraining	4	1	-7.2789	0.0869
orientation	Arch During	laser - retraining	5	1	-1.9071	0.3075
orientation	Arch During	laser - retraining	6	4	0.5462	0.6139
orientation	Arch During	laser - retraining	7	4	-0.8456	0.4454
orientation	Arch During	laser - retraining	8	4	-0.5553	0.6083
orientation	Arch During	laser - retraining	9	4	0.8846	0.4263
orientation	Arch During	laser - retraining	10	4	0.0616	0.9539
orientation	Arch During	laser - occluded	1	1	1.3578	0.4041
orientation	Arch During	laser - occluded	2	2	-2.6661	0.1166
orientation	Arch During	laser - occluded	3	1	0.1024	0.935
orientation	Arch During	laser - occluded	4	1	1.7712	0.3272
orientation	Arch During	laser - occluded	5	2	-0.5847	0.6179
orientation	Arch During	laser - occluded	6	4	0.4904	0.6495
orientation	Arch During	laser - occluded	7	4	0.2878	0.7878
orientation	Arch During	laser - occluded	8	4	-0.4264	0.6918
orientation	Arch During	laser - occluded	9	5	-0.7526	0.4856
orientation	Arch During	laser - occluded	10	5	-1.8002	0.1317
orientation	Arch Between	laser - retraining	1	NA	NA	NA
orientation	Arch Between	laser - retraining	2	1	6.0318	0.1046
orientation	Arch Between	laser - retraining	3	NA	NA	NA
orientation	Arch Between	laser - retraining	4	1	1.3983	0.3952
orientation	Arch Between	laser - retraining	5	2	-0.8915	0.4667
orientation	Arch Between	laser - retraining	6	3	0.3028	0.7818
orientation	Arch Between	laser - retraining	7	3	-0.4511	0.6825
orientation	Arch Between	laser - retraining	8	3	-1.1981	0.3169
orientation	Arch Between	laser - retraining	9	2	0.9498	0.4425
orientation	Arch Between	laser - retraining	10	2	0.2474	0.8277
orientation	Arch Between	laser - occluded	1	NA	NA	NA
orientation	Arch Between	laser - occluded	2	NA	NA	NA
orientation	Arch Between	laser - occluded	3	2	-0.7874	0.5135
orientation	Arch Between	laser - occluded	4	2	-0.8765	0.4732
orientation	Arch Between	laser - occluded	5	2	0.2467	0.8281
orientation	Arch Between	laser - occluded	6	3	0.5996	0.591
orientation	Arch Between	laser - occluded	7	3	-0.0763	0.944
orientation	Arch Between	laser - occluded	8	3	0.8623	0.4519
orientation	Arch Between	laser - occluded	9	2	-0.2932	0.797
orientation	Arch Between	laser - occluded	10	2	-0.1872	0.8687
