# Supplementary material for: Precisely timed dopamine signals establish distinct kinematic representations of skilled movements
Source: eLife. 2020 Nov 27;9:e61591. doi: 10.7554/eLife.61591 (PMC7861618; doi:10.7554/eLife.61591)
Supplement: Figure 7—source data 3. — A .xlsx file containing the statistical output of Wilcoxon ranksum tests for comparisons between Arch During and EYFP group averages in Figures 6D, F, H and J. [file elife-61591-fig7-data3.xlsx]

## Sheet: Sheet1
analysis	session	bin_number	z-value	p-value
final-z	R10	1	-0.683139	0.485936
final-z	R10	2	-0.683139	0.485936
final-z	R10	3	-0.683139	0.485936
final-z	R10	4	-0.683139	0.485936
final-z	R10	5	-0.788237	0.424398
final-z	R10	6	-0.788237	0.424398
final-z	R10	7	-0.788237	0.424398
final-z	R10	8	-0.788237	0.424398
final-z	R10	9	-0.998434	0.314685
final-z	R10	10	-0.788237	0.424398
final-z	R10	11	-0.788237	0.424398
final-z	R10	12	-0.788237	0.424398
final-z	R10	13	-0.788237	0.424398
final-z	R10	14	-0.683139	0.485936
final-z	R10	15	-0.788237	0.424398
final-z	R10	16	-0.788237	0.424398
final-z	R10	17	-0.472942	0.623621
final-z	R10	18	-0.262746	0.774981
final-z	R10	19	-0.367844	0.696814
final-z	R10	20	-0.367844	0.696814
final-z	R10	21	-0.472942	0.622688
final-z	R10	22	-0.262746	0.773271
final-z	R10	23	-0.367844	0.696814
final-z	R10	24	-0.262746	0.773271
final-z	R10	25	-0.262746	0.773271
final-z	R10	26	-0.157647	0.852681
final-z	R10	27	-0.472942	0.622688
final-z	R10	28	-0.472942	0.623621
final-z	R10	29	-0.683139	0.486558
final-z	R10	30	-0.683139	0.486558
final-z	L1	1	0.0525492	0.932867
final-z	L1	2	-0.0525492	0.932867
final-z	L1	3	-0.0525492	0.932867
final-z	L1	4	-0.262746	0.773271
final-z	L1	5	-0.157647	0.852681
final-z	L1	6	-0.157647	0.852681
final-z	L1	7	-0.157647	0.852681
final-z	L1	8	-0.262746	0.773271
final-z	L1	9	-0.472942	0.622688
final-z	L1	10	-0.683139	0.485936
final-z	L1	11	-0.578041	0.552603
final-z	L1	12	-0.683139	0.485936
final-z	L1	13	-0.683139	0.485936
final-z	L1	14	-0.683139	0.485936
final-z	L1	15	-0.683139	0.485936
final-z	L1	16	-0.788237	0.424398
final-z	L1	17	-0.788237	0.424398
final-z	L1	18	-0.472942	0.623621
final-z	L1	19	-0.472942	0.623621
final-z	L1	20	-0.367844	0.696814
final-z	L1	21	-0.367844	0.696814
final-z	L1	22	-0.367844	0.696814
final-z	L1	23	-0.367844	0.696814
final-z	L1	24	-0.367844	0.696814
final-z	L1	25	-0.262746	0.773271
final-z	L1	26	-0.262746	0.773271
final-z	L1	27	-0.262746	0.773271
final-z	L1	28	-0.262746	0.773271
final-z	L1	29	-0.262746	0.773271
final-z	L1	30	-0.262746	0.773271
final-z	L2	1	0	1
final-z	L2	2	-0.157647	0.852681
final-z	L2	3	-0.157647	0.852681
final-z	L2	4	-0.157647	0.852681
final-z	L2	5	-0.0525492	0.932867
final-z	L2	6	-0.0525492	0.932867
final-z	L2	7	0.157647	0.854235
final-z	L2	8	0.0525492	0.934732
final-z	L2	9	-0.157647	0.852681
final-z	L2	10	-0.262746	0.773271
final-z	L2	11	-0.157647	0.852681
final-z	L2	12	-0.0525492	0.932867
final-z	L2	13	0	1
final-z	L2	14	-0.0525492	0.932867
final-z	L2	15	-0.262746	0.773271
final-z	L2	16	-0.157647	0.852681
final-z	L2	17	-0.0525492	0.932867
final-z	L2	18	0.0525492	0.932867
final-z	L2	19	0.0525492	0.932867
final-z	L2	20	0.0525492	0.932867
final-z	L2	21	0.0525492	0.932867
final-z	L2	22	0	1
final-z	L2	23	0.157647	0.854235
final-z	L2	24	0.157647	0.854235
final-z	L2	25	0.0525492	0.934732
final-z	L2	26	0.0525492	0.934732
final-z	L2	27	0	1
final-z	L2	28	-0.157647	0.852681
final-z	L2	29	-0.157647	0.852681
final-z	L2	30	0	1
final-z	L3	1	0.0525492	0.932867
final-z	L3	2	0.262746	0.773271
final-z	L3	3	0.157647	0.852681
final-z	L3	4	0.0525492	0.932867
final-z	L3	5	0.157647	0.852681
final-z	L3	6	0.0525492	0.932867
final-z	L3	7	0.0525492	0.932867
final-z	L3	8	0.157647	0.852681
final-z	L3	9	0.262746	0.773271
final-z	L3	10	0.262746	0.773271
final-z	L3	11	0.157647	0.852681
final-z	L3	12	0.157647	0.854235
final-z	L3	13	0.157647	0.852681
final-z	L3	14	0.262746	0.773271
final-z	L3	15	0.367844	0.696814
final-z	L3	16	0.262746	0.773271
final-z	L3	17	0.367844	0.696814
final-z	L3	18	0.367844	0.696814
final-z	L3	19	0.472942	0.622688
final-z	L3	20	0.578041	0.552603
final-z	L3	21	0.472942	0.622688
final-z	L3	22	0.893336	0.366744
final-z	L3	23	0.788237	0.424398
final-z	L3	24	0.578041	0.552603
final-z	L3	25	0.578041	0.552603
final-z	L3	26	0.893336	0.366744
final-z	L3	27	0.893336	0.366744
final-z	L3	28	0.893336	0.366744
final-z	L3	29	0.578041	0.552603
final-z	L3	30	0.472942	0.622688
final-z	L4	1	-0.0525492	0.932867
final-z	L4	2	-0.157647	0.852681
final-z	L4	3	-0.0525492	0.932867
final-z	L4	4	-0.0525492	0.932867
final-z	L4	5	0.0525492	0.932867
final-z	L4	6	0.0525492	0.932867
final-z	L4	7	0.262746	0.773271
final-z	L4	8	0.262746	0.773271
final-z	L4	9	0.262746	0.773271
final-z	L4	10	0.472942	0.623621
final-z	L4	11	0.472942	0.623621
final-z	L4	12	0.578041	0.55338
final-z	L4	13	0.578041	0.55338
final-z	L4	14	0.262746	0.774981
final-z	L4	15	0.262746	0.774981
final-z	L4	16	0.262746	0.774981
final-z	L4	17	0.0525492	0.932867
final-z	L4	18	0.0525492	0.932867
final-z	L4	19	0.0525492	0.932867
final-z	L4	20	0.0525492	0.932867
final-z	L4	21	0.0525492	0.932867
final-z	L4	22	-0.0525492	0.932867
final-z	L4	23	0.0525492	0.934732
final-z	L4	24	0.262746	0.774981
final-z	L4	25	0.0525492	0.932867
final-z	L4	26	0.262746	0.774981
final-z	L4	27	0.262746	0.774981
final-z	L4	28	0.262746	0.774981
final-z	L4	29	0.262746	0.774981
final-z	L4	30	0.367844	0.698213
final-z	L5	1	-0.366466	0.688423
final-z	L5	2	-0.366466	0.688423
final-z	L5	3	-0.366466	0.688423
final-z	L5	4	-0.366466	0.688423
final-z	L5	5	-0.366466	0.688423
final-z	L5	6	-0.366466	0.688423
final-z	L5	7	-0.366466	0.688423
final-z	L5	8	-0.366466	0.688423
final-z	L5	9	-0.366466	0.688423
final-z	L5	10	-0.366466	0.688423
final-z	L5	11	-0.366466	0.688423
final-z	L5	12	-0.366466	0.688423
final-z	L5	13	-0.366466	0.688423
final-z	L5	14	-0.366466	0.688423
final-z	L5	15	-0.366466	0.688423
final-z	L5	16	-0.366466	0.688423
final-z	L5	17	-0.366466	0.688423
final-z	L5	18	-0.366466	0.688423
final-z	L5	19	-0.366466	0.688423
final-z	L5	20	-0.366466	0.688423
final-z	L5	21	-0.366466	0.688423
final-z	L5	22	-0.21988	0.795649
final-z	L5	23	-0.0732933	0.907537
final-z	L5	24	-0.0732933	0.907537
final-z	L5	25	-0.0732933	0.907537
final-z	L5	26	-0.0732933	0.907537
final-z	L5	27	-0.0732933	0.907537
final-z	L5	28	-0.0732933	0.907537
final-z	L5	29	-0.0732933	0.907537
final-z	L5	30	-0.0732933	0.907537
final-z	L6	1	-0.193862	0.822511
final-z	L6	2	-0.193862	0.822511
final-z	L6	3	-0.323104	0.725941
final-z	L6	4	-0.193862	0.822511
final-z	L6	5	-0.193862	0.822511
final-z	L6	6	-0.193862	0.822511
final-z	L6	7	-0.193862	0.822511
final-z	L6	8	-0.193862	0.822511
final-z	L6	9	-0.193862	0.822511
final-z	L6	10	-0.193862	0.822511
final-z	L6	11	-0.323104	0.725941
final-z	L6	12	-0.323104	0.725941
final-z	L6	13	-0.710829	0.464868
final-z	L6	14	-0.323104	0.725941
final-z	L6	15	-0.323104	0.725941
final-z	L6	16	-0.323104	0.725941
final-z	L6	17	-0.323104	0.725941
final-z	L6	18	-0.323104	0.725941
final-z	L6	19	-0.323104	0.725941
final-z	L6	20	-0.323104	0.725941
final-z	L6	21	-0.323104	0.725941
final-z	L6	22	-0.323104	0.725941
final-z	L6	23	-0.452345	0.634033
final-z	L6	24	-0.452345	0.634033
final-z	L6	25	-0.452345	0.634033
final-z	L6	26	-0.452345	0.634033
final-z	L6	27	-0.710829	0.464868
final-z	L6	28	-0.452345	0.634033
final-z	L6	29	-0.452345	0.634033
final-z	L6	30	-0.452345	0.634033
final-z	O1	1	-1.35704	0.16983
final-z	O1	2	-1.22779	0.214452
final-z	O1	3	-1.48628	0.1332
final-z	O1	4	-1.35704	0.16983
final-z	O1	5	-1.48628	0.1332
final-z	O1	6	-1.48628	0.1332
final-z	O1	7	-1.48628	0.1332
final-z	O1	8	-1.61552	0.101232
final-z	O1	9	-1.48628	0.1332
final-z	O1	10	-0.969312	0.325008
final-z	O1	11	-0.969312	0.325008
final-z	O1	12	-0.84007	0.390276
final-z	O1	13	-1.35704	0.16983
final-z	O1	14	-1.48628	0.1332
final-z	O1	15	-1.48628	0.1332
final-z	O1	16	-1.74476	0.0765901
final-z	O1	17	-1.61552	0.101232
final-z	O1	18	-1.35704	0.16983
final-z	O1	19	-1.22779	0.214452
final-z	O1	20	-1.48628	0.1332
final-z	O1	21	-1.48628	0.1332
final-z	O1	22	-1.35704	0.16983
final-z	O1	23	-1.22779	0.214452
final-z	O1	24	-1.09855	0.265068
final-z	O1	25	-0.969312	0.325008
final-z	O1	26	-0.969312	0.325008
final-z	O1	27	-0.84007	0.390276
final-z	O1	28	-1.09855	0.265068
final-z	O1	29	-0.969312	0.325008
final-z	O1	30	-0.84007	0.391608
final-z	O2	1	-0.868732	0.379798
final-z	O2	2	-0.868732	0.379798
final-z	O2	3	-0.984563	0.321057
final-z	O2	4	-0.984563	0.321368
final-z	O2	5	-0.984563	0.321368
final-z	O2	6	-0.868732	0.379798
final-z	O2	7	-0.868732	0.379798
final-z	O2	8	-0.984563	0.321368
final-z	O2	9	-0.984563	0.321057
final-z	O2	10	-0.984563	0.321057
final-z	O2	11	-0.868732	0.379798
final-z	O2	12	-1.10039	0.26791
final-z	O2	13	-0.984563	0.321057
final-z	O2	14	-0.868732	0.379798
final-z	O2	15	-0.868732	0.379798
final-z	O2	16	-0.868732	0.379798
final-z	O2	17	-0.868732	0.379798
final-z	O2	18	-0.868732	0.379798
final-z	O2	19	-0.868732	0.38073
final-z	O2	20	-0.868732	0.38073
final-z	O2	21	-0.868732	0.38073
final-z	O2	22	-0.868732	0.38073
final-z	O2	23	-0.752901	0.444444
final-z	O2	24	-0.868732	0.38073
final-z	O2	25	-0.752901	0.444444
final-z	O2	26	-0.868732	0.38073
final-z	O2	27	-0.868732	0.38073
final-z	O2	28	-0.868732	0.38073
final-z	O2	29	-0.868732	0.38073
final-z	O2	30	-0.752901	0.444444
final-z	O3	1	-0.683139	0.485936
final-z	O3	2	-0.893336	0.366744
final-z	O3	3	-0.893336	0.366744
final-z	O3	4	-0.893336	0.366744
final-z	O3	5	-1.10353	0.266977
final-z	O3	6	-0.893336	0.366744
final-z	O3	7	-1.10353	0.266977
final-z	O3	8	-1.10353	0.266977
final-z	O3	9	-1.20863	0.224709
final-z	O3	10	-1.10353	0.266977
final-z	O3	11	-1.20863	0.224709
final-z	O3	12	-1.10353	0.266977
final-z	O3	13	-0.893336	0.366744
final-z	O3	14	-0.893336	0.366744
final-z	O3	15	-0.998434	0.314685
final-z	O3	16	-0.998434	0.314685
final-z	O3	17	-0.893336	0.366744
final-z	O3	18	-0.788237	0.424398
final-z	O3	19	-0.683139	0.485936
final-z	O3	20	-0.788237	0.424398
final-z	O3	21	-0.788237	0.424398
final-z	O3	22	-0.893336	0.366744
final-z	O3	23	-1.10353	0.266977
final-z	O3	24	-0.893336	0.366744
final-z	O3	25	-0.893336	0.366744
final-z	O3	26	-0.893336	0.366744
final-z	O3	27	-0.893336	0.366744
final-z	O3	28	-0.893336	0.366744
final-z	O3	29	-0.998434	0.314685
final-z	O3	30	-0.683139	0.485936
final-z	O4	1	-0.683139	0.485936
final-z	O4	2	-0.683139	0.485936
final-z	O4	3	-0.683139	0.485936
final-z	O4	4	-0.788237	0.424398
final-z	O4	5	-0.683139	0.485936
final-z	O4	6	-0.788237	0.424398
final-z	O4	7	-0.578041	0.552603
final-z	O4	8	-0.893336	0.366744
final-z	O4	9	-0.893336	0.366744
final-z	O4	10	-0.893336	0.366744
final-z	O4	11	-0.998434	0.314685
final-z	O4	12	-0.998434	0.314685
final-z	O4	13	-0.788237	0.424398
final-z	O4	14	-0.788237	0.424398
final-z	O4	15	-0.788237	0.424398
final-z	O4	16	-0.683139	0.485936
final-z	O4	17	-0.578041	0.552603
final-z	O4	18	-0.578041	0.552603
final-z	O4	19	-0.578041	0.552603
final-z	O4	20	-0.578041	0.552603
final-z	O4	21	-0.578041	0.552603
final-z	O4	22	-0.683139	0.485936
final-z	O4	23	-0.683139	0.485936
final-z	O4	24	-0.683139	0.485936
final-z	O4	25	-0.683139	0.485936
final-z	O4	26	-0.683139	0.485936
final-z	O4	27	-0.683139	0.485936
final-z	O4	28	-0.683139	0.486558
final-z	O4	29	-0.683139	0.486558
final-z	O4	30	-0.683139	0.486558
final-z	O5	1	-0.289577	0.751515
final-z	O5	2	-0.405408	0.669153
final-z	O5	3	-0.405408	0.669153
final-z	O5	4	-0.405408	0.669153
final-z	O5	5	-0.405408	0.669153
final-z	O5	6	-0.289577	0.751515
final-z	O5	7	-0.289577	0.751515
final-z	O5	8	-0.405408	0.669153
final-z	O5	9	-0.405408	0.669153
final-z	O5	10	-0.173746	0.838539
final-z	O5	11	-0.173746	0.838539
final-z	O5	12	-0.405408	0.669153
final-z	O5	13	-0.405408	0.669153
final-z	O5	14	-0.405408	0.669153
final-z	O5	15	-0.405408	0.669153
final-z	O5	16	-0.289577	0.751515
final-z	O5	17	-0.289577	0.751515
final-z	O5	18	-0.289577	0.751515
final-z	O5	19	-0.289577	0.751515
final-z	O5	20	-0.173746	0.838539
final-z	O5	21	-0.173746	0.838539
final-z	O5	22	-0.173746	0.838539
final-z	O5	23	-0.173746	0.838539
final-z	O5	24	-0.0579155	0.925874
final-z	O5	25	-0.0579155	0.925874
final-z	O5	26	-0.173746	0.838539
final-z	O5	27	-0.173746	0.838539
final-z	O5	28	-0.173746	0.838539
final-z	O5	29	-0.0579155	0.925874
final-z	O5	30	-0.173746	0.838539
aperture	R10	1	1.04083	0.309524
aperture	R10	2	1.04083	0.309524
aperture	R10	3	1.04083	0.309524
aperture	R10	4	1.20096	0.24026
aperture	R10	5	1.04083	0.309524
aperture	R10	6	1.04083	0.309524
aperture	R10	7	1.04083	0.309524
aperture	R10	8	1.04083	0.309524
aperture	R10	9	1.20096	0.24026
aperture	R10	10	1.20096	0.24026
aperture	R10	11	1.20096	0.24026
aperture	R10	12	1.20096	0.24026
aperture	R10	13	1.20096	0.24026
aperture	R10	14	1.20096	0.24026
aperture	R10	15	1.20096	0.24026
aperture	R10	16	1.20096	0.24026
aperture	R10	17	1.20096	0.24026
aperture	R10	18	1.20096	0.24026
aperture	R10	19	1.20096	0.24026
aperture	R10	20	1.20096	0.24026
aperture	R10	21	1.20096	0.24026
aperture	R10	22	1.20096	0.24026
aperture	R10	23	1.20096	0.24026
aperture	R10	24	1.20096	0.24026
aperture	R10	25	1.20096	0.24026
aperture	R10	26	1.20096	0.24026
aperture	R10	27	1.20096	0.24026
aperture	R10	28	1.20096	0.24026
aperture	R10	29	1.20096	0.24026
aperture	R10	30	1.36109	0.179654
aperture	L1	1	1.20096	0.24026
aperture	L1	2	1.36109	0.179654
aperture	L1	3	1.52122	0.132035
aperture	L1	4	1.04083	0.309524
aperture	L1	5	1.20096	0.24026
aperture	L1	6	1.20096	0.24026
aperture	L1	7	1.20096	0.24026
aperture	L1	8	1.20096	0.24026
aperture	L1	9	1.20096	0.24026
aperture	L1	10	1.36109	0.179654
aperture	L1	11	1.52122	0.132035
aperture	L1	12	1.68135	0.0930736
aperture	L1	13	1.68135	0.0930736
aperture	L1	14	1.68135	0.0930736
aperture	L1	15	1.68135	0.0930736
aperture	L1	16	1.68135	0.0930736
aperture	L1	17	1.68135	0.0930736
aperture	L1	18	1.52122	0.132035
aperture	L1	19	1.52122	0.132035
aperture	L1	20	1.52122	0.132035
aperture	L1	21	1.52122	0.132035
aperture	L1	22	1.52122	0.132035
aperture	L1	23	1.84147	0.0649351
aperture	L1	24	1.84147	0.0649351
aperture	L1	25	1.84147	0.0649351
aperture	L1	26	1.84147	0.0649351
aperture	L1	27	1.84147	0.0649351
aperture	L1	28	1.52122	0.132035
aperture	L1	29	1.52122	0.132035
aperture	L1	30	1.52122	0.132035
aperture	L2	1	1.52122	0.132035
aperture	L2	2	1.52122	0.132035
aperture	L2	3	1.52122	0.132035
aperture	L2	4	1.52122	0.132035
aperture	L2	5	1.52122	0.132035
aperture	L2	6	1.52122	0.132035
aperture	L2	7	1.52122	0.132035
aperture	L2	8	1.84147	0.0649351
aperture	L2	9	1.84147	0.0649351
aperture	L2	10	1.84147	0.0649351
aperture	L2	11	1.84147	0.0649351
aperture	L2	12	1.84147	0.0649351
aperture	L2	13	1.84147	0.0649351
aperture	L2	14	1.84147	0.0649351
aperture	L2	15	1.84147	0.0649351
aperture	L2	16	1.36109	0.179654
aperture	L2	17	1.36109	0.179654
aperture	L2	18	1.36109	0.179654
aperture	L2	19	1.36109	0.179654
aperture	L2	20	1.36109	0.179654
aperture	L2	21	1.36109	0.179654
aperture	L2	22	1.36109	0.179654
aperture	L2	23	1.36109	0.179654
aperture	L2	24	1.52122	0.132035
aperture	L2	25	1.52122	0.132035
aperture	L2	26	1.68135	0.0930736
aperture	L2	27	1.68135	0.0930736
aperture	L2	28	1.68135	0.0930736
aperture	L2	29	1.68135	0.0930736
aperture	L2	30	1.68135	0.0930736
aperture	L3	1	1.68135	0.0930736
aperture	L3	2	1.52122	0.132035
aperture	L3	3	1.36109	0.179654
aperture	L3	4	1.20096	0.24026
aperture	L3	5	1.20096	0.24026
aperture	L3	6	1.20096	0.24026
aperture	L3	7	1.20096	0.24026
aperture	L3	8	1.20096	0.24026
aperture	L3	9	1.36109	0.179654
aperture	L3	10	1.36109	0.179654
aperture	L3	11	1.36109	0.179654
aperture	L3	12	1.36109	0.179654
aperture	L3	13	1.36109	0.179654
aperture	L3	14	1.36109	0.179654
aperture	L3	15	1.36109	0.179654
aperture	L3	16	1.36109	0.179654
aperture	L3	17	1.36109	0.179654
aperture	L3	18	1.36109	0.179654
aperture	L3	19	1.36109	0.179654
aperture	L3	20	1.36109	0.179654
aperture	L3	21	1.36109	0.179654
aperture	L3	22	1.36109	0.179654
aperture	L3	23	1.36109	0.179654
aperture	L3	24	1.36109	0.179654
aperture	L3	25	1.52122	0.132035
aperture	L3	26	1.68135	0.0930736
aperture	L3	27	1.68135	0.0930736
aperture	L3	28	1.68135	0.0930736
aperture	L3	29	1.52122	0.132035
aperture	L3	30	1.52122	0.132035
aperture	L4	1	2.0016	0.0411255
aperture	L4	2	1.84147	0.0649351
aperture	L4	3	2.0016	0.0411255
aperture	L4	4	1.84147	0.0649351
aperture	L4	5	1.84147	0.0649351
aperture	L4	6	2.0016	0.0411255
aperture	L4	7	1.68135	0.0930736
aperture	L4	8	1.68135	0.0930736
aperture	L4	9	1.68135	0.0930736
aperture	L4	10	1.68135	0.0930736
aperture	L4	11	1.68135	0.0930736
aperture	L4	12	1.68135	0.0930736
aperture	L4	13	1.84147	0.0649351
aperture	L4	14	1.68135	0.0930736
aperture	L4	15	1.84147	0.0649351
aperture	L4	16	1.84147	0.0649351
aperture	L4	17	1.84147	0.0649351
aperture	L4	18	1.84147	0.0649351
aperture	L4	19	1.84147	0.0649351
aperture	L4	20	1.84147	0.0649351
aperture	L4	21	1.84147	0.0649351
aperture	L4	22	1.84147	0.0649351
aperture	L4	23	1.84147	0.0649351
aperture	L4	24	1.68135	0.0930736
aperture	L4	25	1.68135	0.0930736
aperture	L4	26	1.68135	0.0930736
aperture	L4	27	1.68135	0.0930736
aperture	L4	28	1.68135	0.0930736
aperture	L4	29	1.68135	0.0930736
aperture	L4	30	1.68135	0.0930736
aperture	L5	1	0.903696	0.380952
aperture	L5	2	0.903696	0.380952
aperture	L5	3	1.1619	0.261905
aperture	L5	4	0.903696	0.380952
aperture	L5	5	0.903696	0.380952
aperture	L5	6	0.903696	0.380952
aperture	L5	7	0.903696	0.380952
aperture	L5	8	0.645497	0.547619
aperture	L5	9	0.645497	0.547619
aperture	L5	10	0.903696	0.380952
aperture	L5	11	0.903696	0.380952
aperture	L5	12	1.1619	0.261905
aperture	L5	13	0.903696	0.380952
aperture	L5	14	1.1619	0.261905
aperture	L5	15	1.1619	0.261905
aperture	L5	16	1.1619	0.261905
aperture	L5	17	1.1619	0.261905
aperture	L5	18	1.1619	0.261905
aperture	L5	19	1.1619	0.261905
aperture	L5	20	0.903696	0.380952
aperture	L5	21	0.903696	0.380952
aperture	L5	22	0.903696	0.380952
aperture	L5	23	0.903696	0.380952
aperture	L5	24	0.903696	0.380952
aperture	L5	25	1.1619	0.261905
aperture	L5	26	1.1619	0.261905
aperture	L5	27	1.1619	0.261905
aperture	L5	28	0.903696	0.380952
aperture	L5	29	1.1619	0.261905
aperture	L5	30	1.1619	0.261905
aperture	L6	1	0.746203	0.47619
aperture	L6	2	0.746203	0.47619
aperture	L6	3	0.746203	0.47619
aperture	L6	4	0.959403	0.352381
aperture	L6	5	0.746203	0.47619
aperture	L6	6	0.959403	0.352381
aperture	L6	7	0.959403	0.352381
aperture	L6	8	1.1726	0.257143
aperture	L6	9	1.3858	0.171429
aperture	L6	10	1.3858	0.171429
aperture	L6	11	1.1726	0.257143
aperture	L6	12	0.959403	0.352381
aperture	L6	13	0.959403	0.352381
aperture	L6	14	1.1726	0.257143
aperture	L6	15	0.959403	0.352381
aperture	L6	16	1.1726	0.257143
aperture	L6	17	1.1726	0.257143
aperture	L6	18	1.1726	0.257143
aperture	L6	19	1.1726	0.257143
aperture	L6	20	1.1726	0.257143
aperture	L6	21	1.1726	0.257143
aperture	L6	22	1.3858	0.171429
aperture	L6	23	1.1726	0.257143
aperture	L6	24	1.1726	0.257143
aperture	L6	25	1.3858	0.171429
aperture	L6	26	1.1726	0.257143
aperture	L6	27	1.1726	0.257143
aperture	L6	28	1.1726	0.257143
aperture	L6	29	1.1726	0.257143
aperture	L6	30	1.1726	0.257143
aperture	O1	1	1.1726	0.257143
aperture	O1	2	0.959403	0.352381
aperture	O1	3	0.746203	0.47619
aperture	O1	4	0.746203	0.47619
aperture	O1	5	0.746203	0.47619
aperture	O1	6	0.746203	0.47619
aperture	O1	7	0.746203	0.47619
aperture	O1	8	0.746203	0.47619
aperture	O1	9	0.959403	0.352381
aperture	O1	10	1.3858	0.171429
aperture	O1	11	1.3858	0.171429
aperture	O1	12	1.3858	0.171429
aperture	O1	13	1.1726	0.257143
aperture	O1	14	1.3858	0.171429
aperture	O1	15	1.3858	0.171429
aperture	O1	16	1.3858	0.171429
aperture	O1	17	1.3858	0.171429
aperture	O1	18	1.1726	0.257143
aperture	O1	19	1.1726	0.257143
aperture	O1	20	0.959403	0.352381
aperture	O1	21	0.746203	0.47619
aperture	O1	22	0.959403	0.352381
aperture	O1	23	0.959403	0.352381
aperture	O1	24	0.959403	0.352381
aperture	O1	25	1.1726	0.257143
aperture	O1	26	1.1726	0.257143
aperture	O1	27	1.3858	0.171429
aperture	O1	28	1.3858	0.171429
aperture	O1	29	0.959403	0.352381
aperture	O1	30	0.746203	0.47619
aperture	O2	1	1.36931	0.177489
aperture	O2	2	1.36931	0.177489
aperture	O2	3	1.36931	0.177489
aperture	O2	4	1.36931	0.177489
aperture	O2	5	1.36931	0.177489
aperture	O2	6	1.36931	0.177489
aperture	O2	7	1.36931	0.177489
aperture	O2	8	1.36931	0.177489
aperture	O2	9	1.36931	0.177489
aperture	O2	10	1.36931	0.177489
aperture	O2	11	1.36931	0.177489
aperture	O2	12	1.36931	0.177489
aperture	O2	13	1.36931	0.177489
aperture	O2	14	1.36931	0.177489
aperture	O2	15	1.36931	0.177489
aperture	O2	16	1.36931	0.177489
aperture	O2	17	1.36931	0.177489
aperture	O2	18	1.36931	0.177489
aperture	O2	19	1.55188	0.125541
aperture	O2	20	1.73445	0.0822511
aperture	O2	21	1.73445	0.0822511
aperture	O2	22	1.36931	0.177489
aperture	O2	23	1.36931	0.177489
aperture	O2	24	1.36931	0.177489
aperture	O2	25	1.55188	0.125541
aperture	O2	26	1.36931	0.177489
aperture	O2	27	1.18673	0.246753
aperture	O2	28	1.18673	0.246753
aperture	O2	29	1.36931	0.177489
aperture	O2	30	1.55188	0.125541
aperture	O3	1	2.16173	0.025974
aperture	O3	2	2.16173	0.025974
aperture	O3	3	2.16173	0.025974
aperture	O3	4	2.16173	0.025974
aperture	O3	5	2.16173	0.025974
aperture	O3	6	2.16173	0.025974
aperture	O3	7	1.84147	0.0649351
aperture	O3	8	1.84147	0.0649351
aperture	O3	9	2.0016	0.0411255
aperture	O3	10	2.16173	0.025974
aperture	O3	11	2.0016	0.0411255
aperture	O3	12	2.0016	0.0411255
aperture	O3	13	2.32186	0.0151515
aperture	O3	14	2.16173	0.025974
aperture	O3	15	2.0016	0.0411255
aperture	O3	16	2.0016	0.0411255
aperture	O3	17	2.16173	0.025974
aperture	O3	18	2.32186	0.0151515
aperture	O3	19	2.48199	0.00865801
aperture	O3	20	2.48199	0.00865801
aperture	O3	21	2.48199	0.00865801
aperture	O3	22	2.48199	0.00865801
aperture	O3	23	2.48199	0.00865801
aperture	O3	24	2.48199	0.00865801
aperture	O3	25	2.48199	0.00865801
aperture	O3	26	2.48199	0.00865801
aperture	O3	27	2.48199	0.00865801
aperture	O3	28	2.32186	0.0151515
aperture	O3	29	2.32186	0.0151515
aperture	O3	30	2.48199	0.00865801
aperture	O4	1	1.84147	0.0649351
aperture	O4	2	2.0016	0.0411255
aperture	O4	3	2.0016	0.0411255
aperture	O4	4	2.0016	0.0411255
aperture	O4	5	2.0016	0.0411255
aperture	O4	6	1.84147	0.0649351
aperture	O4	7	2.0016	0.0411255
aperture	O4	8	2.0016	0.0411255
aperture	O4	9	2.0016	0.0411255
aperture	O4	10	1.84147	0.0649351
aperture	O4	11	2.0016	0.0411255
aperture	O4	12	2.0016	0.0411255
aperture	O4	13	2.0016	0.0411255
aperture	O4	14	2.0016	0.0411255
aperture	O4	15	1.84147	0.0649351
aperture	O4	16	2.0016	0.0411255
aperture	O4	17	1.84147	0.0649351
aperture	O4	18	2.0016	0.0411255
aperture	O4	19	1.84147	0.0649351
aperture	O4	20	2.0016	0.0411255
aperture	O4	21	2.0016	0.0411255
aperture	O4	22	2.0016	0.0411255
aperture	O4	23	2.0016	0.0411255
aperture	O4	24	1.84147	0.0649351
aperture	O4	25	1.84147	0.0649351
aperture	O4	26	1.52122	0.132035
aperture	O4	27	1.52122	0.132035
aperture	O4	28	1.36109	0.179654
aperture	O4	29	1.36109	0.179654
aperture	O4	30	1.36109	0.179654
orientation	R10	1	0.40032	0.699134
orientation	R10	2	0.720577	0.484848
orientation	R10	3	1.20096	0.24026
orientation	R10	4	1.04083	0.309524
orientation	R10	5	1.04083	0.309524
orientation	R10	6	0.720577	0.484848
orientation	R10	7	0.560449	0.588745
orientation	R10	8	0.560449	0.588745
orientation	R10	9	0.880705	0.393939
orientation	R10	10	1.04083	0.309524
orientation	R10	11	1.04083	0.309524
orientation	R10	12	0.880705	0.393939
orientation	R10	13	0.720577	0.484848
orientation	R10	14	1.04083	0.309524
orientation	R10	15	0.720577	0.484848
orientation	R10	16	0.880705	0.393939
orientation	R10	17	0.720577	0.484848
orientation	R10	18	0.720577	0.484848
orientation	R10	19	1.20096	0.24026
orientation	R10	20	1.20096	0.24026
orientation	R10	21	1.20096	0.24026
orientation	R10	22	1.04083	0.309524
orientation	R10	23	0.720577	0.484848
orientation	R10	24	0.880705	0.393939
orientation	R10	25	0.720577	0.484848
orientation	R10	26	0.720577	0.484848
orientation	R10	27	0.880705	0.393939
orientation	R10	28	0.880705	0.393939
orientation	R10	29	1.04083	0.309524
orientation	R10	30	0.880705	0.393939
orientation	L1	1	1.84147	0.0649351
orientation	L1	2	1.84147	0.0649351
orientation	L1	3	1.84147	0.0649351
orientation	L1	4	2.0016	0.0411255
orientation	L1	5	2.0016	0.0411255
orientation	L1	6	1.52122	0.132035
orientation	L1	7	1.52122	0.132035
orientation	L1	8	1.68135	0.0930736
orientation	L1	9	1.84147	0.0649351
orientation	L1	10	1.84147	0.0649351
orientation	L1	11	1.20096	0.24026
orientation	L1	12	1.36109	0.179654
orientation	L1	13	1.36109	0.179654
orientation	L1	14	1.36109	0.179654
orientation	L1	15	1.36109	0.179654
orientation	L1	16	1.36109	0.179654
orientation	L1	17	1.36109	0.179654
orientation	L1	18	1.36109	0.179654
orientation	L1	19	1.36109	0.179654
orientation	L1	20	1.36109	0.179654
orientation	L1	21	1.36109	0.179654
orientation	L1	22	1.36109	0.179654
orientation	L1	23	1.36109	0.179654
orientation	L1	24	1.20096	0.24026
orientation	L1	25	1.04083	0.309524
orientation	L1	26	1.20096	0.24026
orientation	L1	27	1.04083	0.309524
orientation	L1	28	1.04083	0.309524
orientation	L1	29	1.04083	0.309524
orientation	L1	30	1.04083	0.309524
orientation	L2	1	1.04083	0.309524
orientation	L2	2	1.36109	0.179654
orientation	L2	3	1.36109	0.179654
orientation	L2	4	1.36109	0.179654
orientation	L2	5	1.20096	0.24026
orientation	L2	6	1.68135	0.0930736
orientation	L2	7	1.84147	0.0649351
orientation	L2	8	1.84147	0.0649351
orientation	L2	9	1.84147	0.0649351
orientation	L2	10	1.84147	0.0649351
orientation	L2	11	1.84147	0.0649351
orientation	L2	12	1.36109	0.179654
orientation	L2	13	1.36109	0.179654
orientation	L2	14	1.20096	0.24026
orientation	L2	15	1.20096	0.24026
orientation	L2	16	1.20096	0.24026
orientation	L2	17	1.36109	0.179654
orientation	L2	18	1.36109	0.179654
orientation	L2	19	1.36109	0.179654
orientation	L2	20	1.36109	0.179654
orientation	L2	21	1.68135	0.0930736
orientation	L2	22	2.0016	0.0411255
orientation	L2	23	1.68135	0.0930736
orientation	L2	24	1.68135	0.0930736
orientation	L2	25	1.68135	0.0930736
orientation	L2	26	1.68135	0.0930736
orientation	L2	27	2.0016	0.0411255
orientation	L2	28	1.52122	0.132035
orientation	L2	29	1.52122	0.132035
orientation	L2	30	1.36109	0.179654
orientation	L3	1	1.04083	0.309524
orientation	L3	2	1.36109	0.179654
orientation	L3	3	1.36109	0.179654
orientation	L3	4	1.36109	0.179654
orientation	L3	5	1.20096	0.24026
orientation	L3	6	1.68135	0.0930736
orientation	L3	7	1.84147	0.0649351
orientation	L3	8	1.84147	0.0649351
orientation	L3	9	1.84147	0.0649351
orientation	L3	10	1.84147	0.0649351
orientation	L3	11	1.84147	0.0649351
orientation	L3	12	1.36109	0.179654
orientation	L3	13	1.36109	0.179654
orientation	L3	14	1.20096	0.24026
orientation	L3	15	1.20096	0.24026
orientation	L3	16	1.20096	0.24026
orientation	L3	17	1.36109	0.179654
orientation	L3	18	1.36109	0.179654
orientation	L3	19	1.36109	0.179654
orientation	L3	20	1.36109	0.179654
orientation	L3	21	1.68135	0.0930736
orientation	L3	22	2.0016	0.0411255
orientation	L3	23	1.68135	0.0930736
orientation	L3	24	1.68135	0.0930736
orientation	L3	25	1.68135	0.0930736
orientation	L3	26	1.68135	0.0930736
orientation	L3	27	2.0016	0.0411255
orientation	L3	28	1.52122	0.132035
orientation	L3	29	1.52122	0.132035
orientation	L3	30	1.36109	0.179654
orientation	L4	1	0.880705	0.393939
orientation	L4	2	0.720577	0.484848
orientation	L4	3	0.560449	0.588745
orientation	L4	4	0.560449	0.588745
orientation	L4	5	0.560449	0.588745
orientation	L4	6	0.560449	0.588745
orientation	L4	7	0.880705	0.393939
orientation	L4	8	0.880705	0.393939
orientation	L4	9	0.560449	0.588745
orientation	L4	10	0.720577	0.484848
orientation	L4	11	0.560449	0.588745
orientation	L4	12	0.560449	0.588745
orientation	L4	13	0.720577	0.484848
orientation	L4	14	1.20096	0.24026
orientation	L4	15	1.04083	0.309524
orientation	L4	16	0.880705	0.393939
orientation	L4	17	0.880705	0.393939
orientation	L4	18	1.36109	0.179654
orientation	L4	19	1.36109	0.179654
orientation	L4	20	1.52122	0.132035
orientation	L4	21	1.20096	0.24026
orientation	L4	22	1.20096	0.24026
orientation	L4	23	1.36109	0.179654
orientation	L4	24	1.52122	0.132035
orientation	L4	25	1.36109	0.179654
orientation	L4	26	1.68135	0.0930736
orientation	L4	27	1.68135	0.0930736
orientation	L4	28	1.52122	0.132035
orientation	L4	29	1.36109	0.179654
orientation	L4	30	1.36109	0.179654
orientation	L5	1	0.645497	0.547619
orientation	L5	2	0.387298	0.714286
orientation	L5	3	0.387298	0.714286
orientation	L5	4	0.645497	0.547619
orientation	L5	5	0.645497	0.547619
orientation	L5	6	0.645497	0.547619
orientation	L5	7	0.903696	0.380952
orientation	L5	8	0.645497	0.547619
orientation	L5	9	0.645497	0.547619
orientation	L5	10	0.387298	0.714286
orientation	L5	11	0.387298	0.714286
orientation	L5	12	0.129099	0.904762
orientation	L5	13	0.129099	0.904762
orientation	L5	14	0	1
orientation	L5	15	0	1
orientation	L5	16	0	1
orientation	L5	17	0	1
orientation	L5	18	0	1
orientation	L5	19	0.129099	0.904762
orientation	L5	20	0.129099	0.904762
orientation	L5	21	0.129099	0.904762
orientation	L5	22	0.387298	0.714286
orientation	L5	23	0.387298	0.714286
orientation	L5	24	0.387298	0.714286
orientation	L5	25	0.387298	0.714286
orientation	L5	26	0.387298	0.714286
orientation	L5	27	0.387298	0.714286
orientation	L5	28	0.387298	0.714286
orientation	L5	29	0.387298	0.714286
orientation	L5	30	0.387298	0.714286
orientation	L6	1	1.3858	0.171429
orientation	L6	2	1.3858	0.171429
orientation	L6	3	1.3858	0.171429
orientation	L6	4	1.3858	0.171429
orientation	L6	5	1.3858	0.171429
orientation	L6	6	1.3858	0.171429
orientation	L6	7	1.3858	0.171429
orientation	L6	8	1.3858	0.171429
orientation	L6	9	1.3858	0.171429
orientation	L6	10	1.3858	0.171429
orientation	L6	11	1.3858	0.171429
orientation	L6	12	1.3858	0.171429
orientation	L6	13	1.3858	0.171429
orientation	L6	14	1.3858	0.171429
orientation	L6	15	1.3858	0.171429
orientation	L6	16	1.3858	0.171429
orientation	L6	17	1.3858	0.171429
orientation	L6	18	1.3858	0.171429
orientation	L6	19	1.3858	0.171429
orientation	L6	20	1.3858	0.171429
orientation	L6	21	1.3858	0.171429
orientation	L6	22	1.3858	0.171429
orientation	L6	23	1.3858	0.171429
orientation	L6	24	1.3858	0.171429
orientation	L6	25	1.3858	0.171429
orientation	L6	26	1.1726	0.257143
orientation	L6	27	1.3858	0.171429
orientation	L6	28	1.3858	0.171429
orientation	L6	29	1.1726	0.257143
orientation	L6	30	1.59901	0.114286
orientation	O1	1	1.1726	0.257143
orientation	O1	2	1.59901	0.114286
orientation	O1	3	1.59901	0.114286
orientation	O1	4	1.3858	0.171429
orientation	O1	5	1.3858	0.171429
orientation	O1	6	1.3858	0.171429
orientation	O1	7	1.59901	0.114286
orientation	O1	8	1.59901	0.114286
orientation	O1	9	1.59901	0.114286
orientation	O1	10	1.3858	0.171429
orientation	O1	11	1.3858	0.171429
orientation	O1	12	1.3858	0.171429
orientation	O1	13	1.59901	0.114286
orientation	O1	14	1.3858	0.171429
orientation	O1	15	1.3858	0.171429
orientation	O1	16	1.59901	0.114286
orientation	O1	17	1.81221	0.0666667
orientation	O1	18	1.81221	0.0666667
orientation	O1	19	1.81221	0.0666667
orientation	O1	20	1.81221	0.0666667
orientation	O1	21	1.81221	0.0666667
orientation	O1	22	1.81221	0.0666667
orientation	O1	23	1.81221	0.0666667
orientation	O1	24	1.81221	0.0666667
orientation	O1	25	1.81221	0.0666667
orientation	O1	26	1.81221	0.0666667
orientation	O1	27	1.81221	0.0666667
orientation	O1	28	2.02541	0.0380952
orientation	O1	29	2.02541	0.0380952
orientation	O1	30	2.02541	0.0380952
orientation	O2	1	2.0996	0.030303
orientation	O2	2	2.0996	0.030303
orientation	O2	3	2.0996	0.030303
orientation	O2	4	1.91703	0.0519481
orientation	O2	5	1.91703	0.0519481
orientation	O2	6	2.0996	0.030303
orientation	O2	7	2.0996	0.030303
orientation	O2	8	2.0996	0.030303
orientation	O2	9	2.0996	0.030303
orientation	O2	10	2.0996	0.030303
orientation	O2	11	2.0996	0.030303
orientation	O2	12	2.0996	0.030303
orientation	O2	13	1.91703	0.0519481
orientation	O2	14	2.0996	0.030303
orientation	O2	15	2.0996	0.030303
orientation	O2	16	2.0996	0.030303
orientation	O2	17	2.0996	0.030303
orientation	O2	18	2.28218	0.017316
orientation	O2	19	2.28218	0.017316
orientation	O2	20	2.28218	0.017316
orientation	O2	21	2.46475	0.00865801
orientation	O2	22	2.28218	0.017316
orientation	O2	23	2.46475	0.00865801
orientation	O2	24	2.28218	0.017316
orientation	O2	25	2.28218	0.017316
orientation	O2	26	2.28218	0.017316
orientation	O2	27	2.28218	0.017316
orientation	O2	28	2.0996	0.030303
orientation	O2	29	2.0996	0.030303
orientation	O2	30	2.0996	0.030303
orientation	O3	1	1.36109	0.179654
orientation	O3	2	1.52122	0.132035
orientation	O3	3	1.52122	0.132035
orientation	O3	4	1.52122	0.132035
orientation	O3	5	1.84147	0.0649351
orientation	O3	6	1.68135	0.0930736
orientation	O3	7	1.68135	0.0930736
orientation	O3	8	1.36109	0.179654
orientation	O3	9	1.68135	0.0930736
orientation	O3	10	1.20096	0.24026
orientation	O3	11	1.68135	0.0930736
orientation	O3	12	1.68135	0.0930736
orientation	O3	13	1.52122	0.132035
orientation	O3	14	1.68135	0.0930736
orientation	O3	15	1.52122	0.132035
orientation	O3	16	1.68135	0.0930736
orientation	O3	17	1.68135	0.0930736
orientation	O3	18	1.68135	0.0930736
orientation	O3	19	1.52122	0.132035
orientation	O3	20	1.52122	0.132035
orientation	O3	21	1.52122	0.132035
orientation	O3	22	1.36109	0.179654
orientation	O3	23	1.36109	0.179654
orientation	O3	24	1.20096	0.24026
orientation	O3	25	1.20096	0.24026
orientation	O3	26	1.20096	0.24026
orientation	O3	27	1.20096	0.24026
orientation	O3	28	1.20096	0.24026
orientation	O3	29	1.20096	0.24026
orientation	O3	30	1.20096	0.24026
orientation	O4	1	1.36109	0.179654
orientation	O4	2	1.36109	0.179654
orientation	O4	3	1.20096	0.24026
orientation	O4	4	1.04083	0.309524
orientation	O4	5	0.720577	0.484848
orientation	O4	6	1.04083	0.309524
orientation	O4	7	1.04083	0.309524
orientation	O4	8	1.20096	0.24026
orientation	O4	9	1.20096	0.24026
orientation	O4	10	1.36109	0.179654
orientation	O4	11	1.36109	0.179654
orientation	O4	12	1.20096	0.24026
orientation	O4	13	1.36109	0.179654
orientation	O4	14	1.36109	0.179654
orientation	O4	15	1.36109	0.179654
orientation	O4	16	1.04083	0.309524
orientation	O4	17	1.04083	0.309524
orientation	O4	18	1.04083	0.309524
orientation	O4	19	1.04083	0.309524
orientation	O4	20	1.04083	0.309524
orientation	O4	21	0.720577	0.484848
orientation	O4	22	0.720577	0.484848
orientation	O4	23	0.880705	0.393939
orientation	O4	24	1.20096	0.24026
orientation	O4	25	1.20096	0.24026
orientation	O4	26	1.36109	0.179654
orientation	O4	27	1.52122	0.132035
orientation	O4	28	1.84147	0.0649351
orientation	O4	29	2.0016	0.0411255
orientation	O4	30	2.0016	0.0411255
velocity	R10	1	1.04083	0.309524
velocity	R10	2	0.880705	0.393939
velocity	R10	3	1.20096	0.24026
velocity	R10	4	1.04083	0.309524
velocity	R10	5	1.04083	0.309524
velocity	R10	6	1.04083	0.309524
velocity	R10	7	1.04083	0.309524
velocity	R10	8	0.880705	0.393939
velocity	R10	9	1.04083	0.309524
velocity	R10	10	0.720577	0.484848
velocity	R10	11	0.720577	0.484848
velocity	R10	12	1.20096	0.24026
velocity	R10	13	0.720577	0.484848
velocity	R10	14	0.880705	0.393939
velocity	R10	15	1.04083	0.309524
velocity	R10	16	1.04083	0.309524
velocity	R10	17	0.880705	0.393939
velocity	R10	18	1.20096	0.24026
velocity	R10	19	1.04083	0.309524
velocity	R10	20	1.20096	0.24026
velocity	R10	21	0.880705	0.393939
velocity	R10	22	0.880705	0.393939
velocity	R10	23	1.04083	0.309524
velocity	R10	24	0.880705	0.393939
velocity	R10	25	0.880705	0.393939
velocity	R10	26	1.04083	0.309524
velocity	R10	27	1.04083	0.309524
velocity	R10	28	1.04083	0.309524
velocity	R10	29	0.880705	0.393939
velocity	R10	30	0.880705	0.393939
velocity	L1	1	1.04083	0.309524
velocity	L1	2	0.880705	0.393939
velocity	L1	3	1.04083	0.309524
velocity	L1	4	0.560449	0.588745
velocity	L1	5	0.720577	0.484848
velocity	L1	6	0.720577	0.484848
velocity	L1	7	0.720577	0.484848
velocity	L1	8	0.720577	0.484848
velocity	L1	9	0.880705	0.393939
velocity	L1	10	0.880705	0.393939
velocity	L1	11	1.20096	0.24026
velocity	L1	12	0.880705	0.393939
velocity	L1	13	0.880705	0.393939
velocity	L1	14	1.04083	0.309524
velocity	L1	15	0.880705	0.393939
velocity	L1	16	0.880705	0.393939
velocity	L1	17	0.880705	0.393939
velocity	L1	18	0.720577	0.484848
velocity	L1	19	0.720577	0.484848
velocity	L1	20	0.720577	0.484848
velocity	L1	21	0.720577	0.484848
velocity	L1	22	0.720577	0.484848
velocity	L1	23	0.720577	0.484848
velocity	L1	24	0.880705	0.393939
velocity	L1	25	1.20096	0.24026
velocity	L1	26	1.04083	0.309524
velocity	L1	27	1.04083	0.309524
velocity	L1	28	1.20096	0.24026
velocity	L1	29	1.20096	0.24026
velocity	L1	30	1.20096	0.24026
velocity	L2	1	0.240192	0.818182
velocity	L2	2	0.240192	0.818182
velocity	L2	3	0.240192	0.818182
velocity	L2	4	0.0800641	0.937229
velocity	L2	5	0.0800641	0.937229
velocity	L2	6	0.240192	0.818182
velocity	L2	7	0.240192	0.818182
velocity	L2	8	0.40032	0.699134
velocity	L2	9	0.40032	0.699134
velocity	L2	10	0.40032	0.699134
velocity	L2	11	0.40032	0.699134
velocity	L2	12	0.560449	0.588745
velocity	L2	13	0.560449	0.588745
velocity	L2	14	0.560449	0.588745
velocity	L2	15	0.560449	0.588745
velocity	L2	16	0.720577	0.484848
velocity	L2	17	0.880705	0.393939
velocity	L2	18	0.880705	0.393939
velocity	L2	19	0.880705	0.393939
velocity	L2	20	0.40032	0.699134
velocity	L2	21	0.40032	0.699134
velocity	L2	22	0.40032	0.699134
velocity	L2	23	0.40032	0.699134
velocity	L2	24	0.40032	0.699134
velocity	L2	25	0.40032	0.699134
velocity	L2	26	0.40032	0.699134
velocity	L2	27	0.40032	0.699134
velocity	L2	28	0.40032	0.699134
velocity	L2	29	0.40032	0.699134
velocity	L2	30	0.720577	0.484848
velocity	L3	1	0.240192	0.818182
velocity	L3	2	0.240192	0.818182
velocity	L3	3	0.240192	0.818182
velocity	L3	4	0.0800641	0.937229
velocity	L3	5	0.0800641	0.937229
velocity	L3	6	0.0800641	0.937229
velocity	L3	7	0	1
velocity	L3	8	0.240192	0.818182
velocity	L3	9	0	1
velocity	L3	10	0.240192	0.818182
velocity	L3	11	0.0800641	0.937229
velocity	L3	12	0.240192	0.818182
velocity	L3	13	0.240192	0.818182
velocity	L3	14	0.240192	0.818182
velocity	L3	15	0.0800641	0.937229
velocity	L3	16	-0.0800641	0.937229
velocity	L3	17	0.240192	0.818182
velocity	L3	18	0.40032	0.699134
velocity	L3	19	0.40032	0.699134
velocity	L3	20	0.0800641	0.937229
velocity	L3	21	0.240192	0.818182
velocity	L3	22	0.240192	0.818182
velocity	L3	23	0.240192	0.818182
velocity	L3	24	0.240192	0.818182
velocity	L3	25	0.240192	0.818182
velocity	L3	26	0.240192	0.818182
velocity	L3	27	0.240192	0.818182
velocity	L3	28	0.240192	0.818182
velocity	L3	29	0.240192	0.818182
velocity	L3	30	0.240192	0.818182
velocity	L4	1	0.40032	0.699134
velocity	L4	2	0.40032	0.699134
velocity	L4	3	0.40032	0.699134
velocity	L4	4	0.40032	0.699134
velocity	L4	5	0.40032	0.699134
velocity	L4	6	0.240192	0.818182
velocity	L4	7	0	1
velocity	L4	8	0.0800641	0.937229
velocity	L4	9	0	1
velocity	L4	10	0	1
velocity	L4	11	0	1
velocity	L4	12	0.240192	0.818182
velocity	L4	13	0.0800641	0.937229
velocity	L4	14	0.40032	0.699134
velocity	L4	15	0.240192	0.818182
velocity	L4	16	0.240192	0.818182
velocity	L4	17	0.0800641	0.937229
velocity	L4	18	0.0800641	0.937229
velocity	L4	19	0.240192	0.818182
velocity	L4	20	0.240192	0.818182
velocity	L4	21	0.240192	0.818182
velocity	L4	22	0.240192	0.818182
velocity	L4	23	0.880705	0.393939
velocity	L4	24	0.880705	0.393939
velocity	L4	25	0.880705	0.393939
velocity	L4	26	0.880705	0.393939
velocity	L4	27	0.880705	0.393939
velocity	L4	28	0.880705	0.393939
velocity	L4	29	1.04083	0.309524
velocity	L4	30	1.04083	0.309524
velocity	L5	1	-0.387298	0.714286
velocity	L5	2	-0.129099	0.904762
velocity	L5	3	-0.129099	0.904762
velocity	L5	4	-0.129099	0.904762
velocity	L5	5	-0.129099	0.904762
velocity	L5	6	-0.387298	0.714286
velocity	L5	7	-0.645497	0.547619
velocity	L5	8	-0.645497	0.547619
velocity	L5	9	-0.387298	0.714286
velocity	L5	10	-0.645497	0.547619
velocity	L5	11	-0.645497	0.547619
velocity	L5	12	-0.903696	0.380952
velocity	L5	13	-0.903696	0.380952
velocity	L5	14	-0.903696	0.380952
velocity	L5	15	-0.645497	0.547619
velocity	L5	16	-0.645497	0.547619
velocity	L5	17	-0.645497	0.547619
velocity	L5	18	-0.387298	0.714286
velocity	L5	19	-0.387298	0.714286
velocity	L5	20	-0.387298	0.714286
velocity	L5	21	-0.387298	0.714286
velocity	L5	22	-0.129099	0.904762
velocity	L5	23	-0.129099	0.904762
velocity	L5	24	-0.387298	0.714286
velocity	L5	25	-0.387298	0.714286
velocity	L5	26	-0.387298	0.714286
velocity	L5	27	-0.387298	0.714286
velocity	L5	28	-0.387298	0.714286
velocity	L5	29	-0.387298	0.714286
velocity	L5	30	-0.129099	0.904762
velocity	L6	1	0.1066	0.914286
velocity	L6	2	0	1
velocity	L6	3	0	1
velocity	L6	4	0	1
velocity	L6	5	-0.1066	0.914286
velocity	L6	6	0.1066	0.914286
velocity	L6	7	0.1066	0.914286
velocity	L6	8	0.1066	0.914286
velocity	L6	9	0.1066	0.914286
velocity	L6	10	-0.1066	0.914286
velocity	L6	11	-0.319801	0.761905
velocity	L6	12	-0.1066	0.914286
velocity	L6	13	-0.1066	0.914286
velocity	L6	14	-0.1066	0.914286
velocity	L6	15	-0.319801	0.761905
velocity	L6	16	-0.1066	0.914286
velocity	L6	17	-0.1066	0.914286
velocity	L6	18	0	1
velocity	L6	19	-0.319801	0.761905
velocity	L6	20	-0.1066	0.914286
velocity	L6	21	0	1
velocity	L6	22	-0.1066	0.914286
velocity	L6	23	-0.319801	0.761905
velocity	L6	24	-0.319801	0.761905
velocity	L6	25	-0.319801	0.761905
velocity	L6	26	-0.319801	0.761905
velocity	L6	27	-0.319801	0.761905
velocity	L6	28	-0.319801	0.761905
velocity	L6	29	-0.319801	0.761905
velocity	L6	30	-0.319801	0.761905
velocity	O1	1	1.1726	0.257143
velocity	O1	2	1.1726	0.257143
velocity	O1	3	0.959403	0.352381
velocity	O1	4	0.959403	0.352381
velocity	O1	5	0.959403	0.352381
velocity	O1	6	0.959403	0.352381
velocity	O1	7	0.959403	0.352381
velocity	O1	8	0.959403	0.352381
velocity	O1	9	1.1726	0.257143
velocity	O1	10	1.3858	0.171429
velocity	O1	11	1.3858	0.171429
velocity	O1	12	0.959403	0.352381
velocity	O1	13	0.959403	0.352381
velocity	O1	14	1.1726	0.257143
velocity	O1	15	1.1726	0.257143
velocity	O1	16	1.1726	0.257143
velocity	O1	17	0.959403	0.352381
velocity	O1	18	0.959403	0.352381
velocity	O1	19	0.959403	0.352381
velocity	O1	20	0.959403	0.352381
velocity	O1	21	1.1726	0.257143
velocity	O1	22	0.959403	0.352381
velocity	O1	23	1.1726	0.257143
velocity	O1	24	1.1726	0.257143
velocity	O1	25	0.959403	0.352381
velocity	O1	26	0.959403	0.352381
velocity	O1	27	0.959403	0.352381
velocity	O1	28	0.959403	0.352381
velocity	O1	29	0.959403	0.352381
velocity	O1	30	0.959403	0.352381
velocity	O2	1	1.00416	0.329004
velocity	O2	2	0.821584	0.428571
velocity	O2	3	0.821584	0.428571
velocity	O2	4	0.821584	0.428571
velocity	O2	5	0.63901	0.536797
velocity	O2	6	0.821584	0.428571
velocity	O2	7	0.821584	0.428571
velocity	O2	8	0.456435	0.662338
velocity	O2	9	0.456435	0.662338
velocity	O2	10	0.456435	0.662338
velocity	O2	11	0.273861	0.792208
velocity	O2	12	0.273861	0.792208
velocity	O2	13	0.273861	0.792208
velocity	O2	14	0.273861	0.792208
velocity	O2	15	0.273861	0.792208
velocity	O2	16	0.273861	0.792208
velocity	O2	17	0.273861	0.792208
velocity	O2	18	0.273861	0.792208
velocity	O2	19	0.273861	0.792208
velocity	O2	20	0.273861	0.792208
velocity	O2	21	0.273861	0.792208
velocity	O2	22	0.273861	0.792208
velocity	O2	23	0.273861	0.792208
velocity	O2	24	0.273861	0.792208
velocity	O2	25	0.456435	0.662338
velocity	O2	26	0.456435	0.662338
velocity	O2	27	0.456435	0.662338
velocity	O2	28	0.456435	0.662338
velocity	O2	29	0.456435	0.662338
velocity	O2	30	0.456435	0.662338
velocity	O3	1	0.880705	0.393939
velocity	O3	2	0.880705	0.393939
velocity	O3	3	0.720577	0.484848
velocity	O3	4	0.720577	0.484848
velocity	O3	5	0.720577	0.484848
velocity	O3	6	0.720577	0.484848
velocity	O3	7	1.20096	0.24026
velocity	O3	8	1.20096	0.24026
velocity	O3	9	1.20096	0.24026
velocity	O3	10	1.20096	0.24026
velocity	O3	11	1.20096	0.24026
velocity	O3	12	1.20096	0.24026
velocity	O3	13	1.20096	0.24026
velocity	O3	14	1.20096	0.24026
velocity	O3	15	1.20096	0.24026
velocity	O3	16	0.880705	0.393939
velocity	O3	17	1.04083	0.309524
velocity	O3	18	1.04083	0.309524
velocity	O3	19	1.04083	0.309524
velocity	O3	20	1.04083	0.309524
velocity	O3	21	1.20096	0.24026
velocity	O3	22	1.20096	0.24026
velocity	O3	23	0.880705	0.393939
velocity	O3	24	1.04083	0.309524
velocity	O3	25	1.04083	0.309524
velocity	O3	26	1.20096	0.24026
velocity	O3	27	1.04083	0.309524
velocity	O3	28	1.04083	0.309524
velocity	O3	29	1.04083	0.309524
velocity	O3	30	1.04083	0.309524
velocity	O4	1	1.20096	0.24026
velocity	O4	2	1.20096	0.24026
velocity	O4	3	1.20096	0.24026
velocity	O4	4	1.20096	0.24026
velocity	O4	5	1.20096	0.24026
velocity	O4	6	1.20096	0.24026
velocity	O4	7	1.20096	0.24026
velocity	O4	8	1.04083	0.309524
velocity	O4	9	1.04083	0.309524
velocity	O4	10	1.04083	0.309524
velocity	O4	11	1.04083	0.309524
velocity	O4	12	1.20096	0.24026
velocity	O4	13	1.20096	0.24026
velocity	O4	14	1.20096	0.24026
velocity	O4	15	1.20096	0.24026
velocity	O4	16	1.20096	0.24026
velocity	O4	17	1.20096	0.24026
velocity	O4	18	1.20096	0.24026
velocity	O4	19	1.20096	0.24026
velocity	O4	20	1.20096	0.24026
velocity	O4	21	1.20096	0.24026
velocity	O4	22	1.20096	0.24026
velocity	O4	23	1.20096	0.24026
velocity	O4	24	1.20096	0.24026
velocity	O4	25	1.20096	0.24026
velocity	O4	26	1.20096	0.24026
velocity	O4	27	1.04083	0.309524
velocity	O4	28	1.04083	0.309524
velocity	O4	29	0.880705	0.393939
velocity	O4	30	0.720577	0.484848
