# Supplementary material for: Precisely timed dopamine signals establish distinct kinematic representations of skilled movements
Source: eLife. 2020 Nov 27;9:e61591. doi: 10.7554/eLife.61591 (PMC7861618; doi:10.7554/eLife.61591)
Supplement: Figure 9—figure supplement 2—source data 2. — A .xlsx file containing statistical output of post hoc contrast tests comparing mean aperture in successful and failed reaches for each group in panel B. [file elife-61591-fig9-figsupp2-data2.xlsx]

## Sheet: Sheet1
Group	Laser Session	df	t	p
ChR2 During	1	1210	-1.13	0.258
ChR2 During	2	1210	-1.68	0.092
ChR2 During	3	1210	-2.42	0.016
ChR2 During	4	1210	-3.31	0.0009626
ChR2 During	5	1210	-4.17	3.297e-05
ChR2 During	6	1210	-4.63	4.057e-06
ChR2 During	7	1210	-4.59	4.863e-06
ChR2 During	8	1210	-4.29	1.916e-05
ChR2 During	9	1210	-3.95	8.435e-05
ChR2 During	10	1210	-3.64	0.000289
ChR2 Between	1	1210	-1.4	0.162
ChR2 Between	2	1210	-1.45	0.146
ChR2 Between	3	1210	-1.49	0.135
ChR2 Between	4	1210	-1.48	0.14
ChR2 Between	5	1210	-1.32	0.186
ChR2 Between	6	1210	-1	0.316
ChR2 Between	7	1210	-0.62	0.535
ChR2 Between	8	1210	-0.294	0.769
ChR2 Between	9	1210	-0.052	0.958
ChR2 Between	10	1210	0.12	0.904
Arch During	1	1210	-0.675	0.499
Arch During	2	1210	-0.904	0.366
Arch During	3	1210	-1.2	0.231
Arch During	4	1210	-1.55	0.121
Arch During	5	1210	-1.866	0.062
Arch During	6	1210	-2	0.045
Arch During	7	1210	-1.933	0.053
Arch During	8	1210	-1.765	0.078
Arch During	9	1210	-1.59	0.112
Arch During	10	1210	-1.44	0.15
Arch Between	1	1210	-0.347	0.729
Arch Between	2	1210	-0.52	0.603
Arch Between	3	1210	-0.75	0.453
Arch Between	4	1210	-1.03	0.301
Arch Between	5	1210	-1.32	0.187
Arch Between	6	1210	-1.5	0.135
Arch Between	7	1210	-1.51	0.132
Arch Between	8	1210	-1.42	0.156
Arch Between	9	1210	-1.31	0.191
Arch Between	10	1210	-1.21	0.228
EYFP	1	1210	-1.375	0.169
EYFP	2	1210	-1.522	0.128
EYFP	3	1210	-1.69	0.091
EYFP	4	1210	-1.85	0.065
EYFP	5	1210	-1.89	0.059
EYFP	6	1210	-1.74	0.083
EYFP	7	1210	-1.42	0.155
EYFP	8	1210	-1.096	0.273
EYFP	9	1210	-0.825	0.41
EYFP	10	1210	-0.616	0.538
