# Supplementary material for: Precisely timed dopamine signals establish distinct kinematic representations of skilled movements
Source: eLife. 2020 Nov 27;9:e61591. doi: 10.7554/eLife.61591 (PMC7861618; doi:10.7554/eLife.61591)
Supplement: Figure 9—figure supplement 3—source data 2. — A .xlsx file containing statistical output of post hoc contrast tests comparing mean orientation in successful and failed reaches for each group in panel B. [file elife-61591-fig9-figsupp3-data2.xlsx]

## Sheet: Sheet1
Group	Laser Session	df	t	p
ChR2 During	1	1210	0.444	0.657
ChR2 During	2	1210	0.477	0.634
ChR2 During	3	1210	0.51	0.61
ChR2 During	4	1210	0.529	0.597
ChR2 During	5	1210	0.509	0.611
ChR2 During	6	1210	0.429	0.668
ChR2 During	7	1210	0.318	0.751
ChR2 During	8	1210	0.215	0.83
ChR2 During	9	1210	0.135	0.892
ChR2 During	10	1210	0.076	0.939
ChR2 Between	1	1210	0.32	0.749
ChR2 Between	2	1210	0.475	0.634
ChR2 Between	3	1210	0.683	0.495
ChR2 Between	4	1210	0.939	0.348
ChR2 Between	5	1210	1.189	0.235
ChR2 Between	6	1210	1.33	0.185
ChR2 Between	7	1210	1.315	0.189
ChR2 Between	8	1210	1.226	0.22
ChR2 Between	9	1210	1.124	0.261
ChR2 Between	10	1210	1.034	0.302
Arch During	1	1210	-0.196	0.844
Arch During	2	1210	-0.094	0.925
Arch During	3	1210	0.052	0.958
Arch During	4	1210	0.252	0.801
Arch During	5	1210	0.487	0.626
Arch During	6	1210	0.688	0.492
Arch During	7	1210	0.8	0.424
Arch During	8	1210	0.837	0.403
Arch During	9	1210	0.838	0.402
Arch During	10	1210	0.825	0.41
Arch Between	1	1210	0.032	0.974
Arch Between	2	1210	0.077	0.939
Arch Between	3	1210	0.138	0.89
Arch Between	4	1210	0.217	0.828
Arch Between	5	1210	0.301	0.763
Arch Between	6	1210	0.363	0.717
Arch Between	7	1210	0.382	0.702
Arch Between	8	1210	0.373	0.709
Arch Between	9	1210	0.354	0.723
Arch Between	10	1210	0.334	0.738
EYFP	1	1210	0.47	0.639
EYFP	2	1210	0.465	0.642
EYFP	3	1210	0.448	0.655
EYFP	4	1210	0.402	0.688
EYFP	5	1210	0.308	0.758
EYFP	6	1210	0.171	0.864
EYFP	7	1210	0.031	0.975
EYFP	8	1210	-0.078	0.938
EYFP	9	1210	-0.154	0.878
EYFP	10	1210	-0.205	0.837
